# Supplementary material
Source: publisher figshare collection journal article supplement (https://gsajournals.figshare.com/ndownloader/files/21946977)
Supplement: Supplementary file 1 [file 21946977]

EntryID	Pop	FruitID	Gid	Weight	Length	Width	Brix	DM	L	a	b
1	C0	GS1_1.01	GS1_1	573.0	14.0	8.5	13.3	17.9	70.6	32.6	80.7
2	C0	GS1_1.02	GS1_1	242.6	10.5	7.5	10.7	15.5	72.3	26.5	75.3
3	C0	GS1_1.03	GS1_1	466.7	16.0	7.5	12.8	20.4	71.0	32.1	82.7
4	C0	GS1_1.04	GS1_1	373.9	12.0	8.0	12.0	16.0	69.1	31.8	77.5
5	C0	GS1_1.05	GS1_1	316.1	12.5	7.5	13.0	22.7	71.7	30.6	82.5
6	C0	GS1_1.06	GS1_1	443.6	14.0	7.5	12.8	17.6	69.7	34.7	77.6
7	C0	GS1_10.01	GS1_10	723.3	16.5	9.5	12.3	15.3	74.7	24.6	76.0
8	C0	GS1_10.02	GS1_10	725.1	18.0	9.5	9.4	13.7	73.3	23.4	76.7
9	C0	GS1_10.03	GS1_10	676.9	17.0	9.5	11.3	12.6	74.5	24.1	74.3
10	C0	GS1_10.04	GS1_10	823.3	18.5	10.0	10.7	12.3	74.5	24.0	77.1
11	C0	GS1_10.05	GS1_10	675.8	16.0	9.5	11.5	13.7	73.6	24.6	74.9
12	C0	GS1_10.06	GS1_10	951.3	15.5	11.0	10.6	11.4	75.3	23.7	72.6
13	C0	GS1_100.01	GS1_100	624.3	18.0	8.5	10.5	13.3	69.9	31.4	77.4
14	C0	GS1_100.02	GS1_100	524.4	15.0	8.5	11.1	12.3	68.0	32.5	74.3
15	C0	GS1_100.03	GS1_100	711.0	17.0	9.5	12.7	13.9	69.2	31.5	77.8
16	C0	GS1_100.04	GS1_100	929.4	17.5	10.5	13.5	15.2	69.4	33.8	74.0
17	C0	GS1_100.05	GS1_100	593.5	15.0	9.0	13.2	13.7	72.8	28.7	77.1
18	C0	GS1_100.06	GS1_100	763.3	19.0	10.0	10.3	12.7	71.4	28.7	74.9
19	C0	GS1_101.01	GS1_101	928.7	16.0	10.0	13.2	16.5	70.9	31.4	76.6
20	C0	GS1_101.02	GS1_101	605.5	14.5	9.0	12.4	16.1	69.2	30.7	75.6
21	C0	GS1_101.03	GS1_101	1080.2	20.0	10.5	14.1	15.4	70.0	30.2	73.6
22	C0	GS1_101.04	GS1_101	753.5	15.0	10.0	14.1	16.8	69.3	31.1	73.3
23	C0	GS1_101.05	GS1_101	931.3	19.0	11.0	14.0	16.0	68.4	32.8	78.5
24	C0	GS1_101.06	GS1_101	925.2	17.0	10.0	13.8	15.1	71.5	30.9	74.6
25	C0	GS1_102.01	GS1_102	777.4	15.0	10.0	12.8	14.8	73.1	23.5	74.4
26	C0	GS1_102.02	GS1_102	1040.9	17.0	10.0	11.8	16.4	74.9	23.1	79.8
27	C0	GS1_102.03	GS1_102	788.1	15.0	10.5	12.1	14.6	70.8	27.0	79.1
28	C0	GS1_102.04	GS1_102	366.1	13.0	8.0	13.3	20.8	70.2	29.1	78.8
29	C0	GS1_102.05	GS1_102	884.3	17.0	10.5	12.3	14.9	72.9	26.2	80.7
30	C0	GS1_102.06	GS1_102	701.2	16.0	9.5	13.2	16.7	71.4	25.4	80.9
31	C0	GS1_103.01	GS1_103	983.9	16.5	11.5	12.7	18.2	71.8	28.4	72.5
32	C0	GS1_103.02	GS1_103	946.0	17.0	10.5	11.4	13.3	70.2	31.3	75.3
33	C0	GS1_103.03	GS1_103	669.3	17.0	9.0	11.4	14.2	74.4	27.9	73.7
34	C0	GS1_103.04	GS1_103	787.8	16.5	9.5	12.4	15.6	70.0	30.8	74.0
35	C0	GS1_103.05	GS1_103	611.7	15.0	9.0	13.1	14.9	73.6	29.5	74.8
36	C0	GS1_103.06	GS1_103	740.4	16.5	9.0	11.5	15.3	68.9	33.6	74.2
37	C0	GS1_104.01	GS1_104	608.5	17.0	10.0	14.5	16.8	69.6	31.3	74.4
38	C0	GS1_104.02	GS1_104	476.8	14.0	8.5	11.8	14.7	71.7	29.2	71.9
39	C0	GS1_104.03	GS1_104	530.2	15.0	8.5	10.9	12.4	72.5	29.8	71.6
40	C0	GS1_104.04	GS1_104	764.5	17.5	10.0	11.8	13.7	68.0	33.6	67.5
41	C0	GS1_104.05	GS1_104	531.5	14.5	9.5	13.4	16.7	72.9	27.8	73.2
42	C0	GS1_104.06	GS1_104	683.5	18.0	10.0	10.9	11.6	69.4	31.0	72.2
43	C0	GS1_105.01	GS1_105	1001.4	18.0	10.5	12.3	16.1	68.6	28.2	73.7
44	C0	GS1_105.02	GS1_105	982.5	18.0	11.0	11.1	12.2	67.8	28.8	76.8
45	C0	GS1_105.03	GS1_105	930.1	17.0	10.5	12.9	16.7	69.1	27.1	76.6
46	C0	GS1_105.04	GS1_105	987.6	18.5	11.0	13.3	15.5	68.6	28.7	75.5
47	C0	GS1_105.05	GS1_105	868.8	18.5	10.0	13.6	16.3	68.8	31.5	74.1
48	C0	GS1_105.06	GS1_105	1021.5	19.5	10.0	11.7	14.2	69.5	27.9	76.1
49	C0	GS1_106.01	GS1_106	1129.5	17.5	12.0	11.1	13.6	75.0	23.4	75.1
50	C0	GS1_106.02	GS1_106	972.8	17.0	11.0	10.8	13.0	72.5	23.3	75.3
51	C0	GS1_106.03	GS1_106	1092.9	16.0	12.0	8.5	12.3	74.8	23.8	76.4
52	C0	GS1_106.04	GS1_106	1030.6	15.5	11.5	11.1	11.9	76.2	23.2	69.2
53	C0	GS1_107.01	GS1_107	637.9	16.5	9.0	12.6	13.7	72.4	24.4	73.5
54	C0	GS1_107.02	GS1_107	745.2	17.5	10.0	10.4	11.9	72.8	25.5	75.6
55	C0	GS1_107.03	GS1_107	1082.5	18.5	10.5	9.9	10.6	73.3	25.2	72.0
56	C0	GS1_107.04	GS1_107	682.7	17.0	9.0	10.8	13.6	69.9	28.7	79.6
57	C0	GS1_107.05	GS1_107	781.7	15.0	10.5	11.2	11.8	73.1	22.8	73.8
58	C0	GS1_107.06	GS1_107	731.3	18.0	9.5	10.3	11.3	71.6	25.6	75.6
59	C0	GS1_108.01	GS1_108	404.3	13.0	8.5	9.8	14.9	67.4	29.5	76.2
60	C0	GS1_108.02	GS1_108	503.9	14.0	9.0	11.7	13.5	67.2	29.6	76.8
61	C0	GS1_108.03	GS1_108	541.7	13.5	9.0	11.4	15.2	68.9	29.0	78.9
62	C0	GS1_108.04	GS1_108	738.0	14.0	9.5	11.8	15.6	69.4	30.7	78.1
63	C0	GS1_108.05	GS1_108	725.2	16.5	9.0	9.3	14.8	67.6	31.9	74.9
64	C0	GS1_108.06	GS1_108	397.1	12.0	8.0	12.5	14.3	67.4	30.2	75.6
65	C0	GS1_109.01	GS1_109	794.8	17.0	9.0	12.6	16.4	70.4	30.0	74.8
66	C0	GS1_109.02	GS1_109	650.2	16.5	9.0	11.3	13.2	71.7	25.4	73.5
67	C0	GS1_109.03	GS1_109	490.4	15.0	8.0	10.9	12.3	72.6	24.4	73.0
68	C0	GS1_109.04	GS1_109	418.8	13.5	8.5	11.6	13.0	71.8	25.6	76.5
69	C0	GS1_109.05	GS1_109	652.5	16.0	9.5	13.3	14.6	70.9	29.0	73.3
70	C0	GS1_109.06	GS1_109	310.0	12.0	7.5	9.7	11.9	70.6	25.6	75.0
71	C0	GS1_11.01	GS1_11	747.4	17.0	9.5	12.9	15.6	70.5	30.2	78.8
72	C0	GS1_11.02	GS1_11	759.6	17.5	10.0	12.4	15.5	70.4	27.4	77.5
73	C0	GS1_11.03	GS1_11	785.8	21.0	10.0	11.5	14.8	70.6	29.5	78.4
74	C0	GS1_11.04	GS1_11	603.7	18.5	9.0	12.6	17.1	70.8	31.3	80.8
75	C0	GS1_11.05	GS1_11	754.8	17.5	10.5	10.5	15.2	70.2	28.9	78.9
76	C0	GS1_11.06	GS1_11	591.7	16.0	9.0	13.2	16.4	72.6	25.2	78.6
77	C0	GS1_110.01	GS1_110	937.3	16.5	10.5	10.4	13.3	73.2	23.6	76.2
78	C0	GS1_110.02	GS1_110	1237.8	17.5	11.5	11.9	14.1	73.5	24.5	76.4
79	C0	GS1_110.03	GS1_110	824.5	16.0	11.0	11.3	15.8	71.3	25.1	77.0
80	C0	GS1_110.04	GS1_110	1098.5	16.5	11.5	9.1	10.4	75.7	22.4	69.2
81	C0	GS1_110.05	GS1_110	1253.0	18.5	11.0	10.3	12.6	72.8	26.0	79.4
82	C0	GS1_110.06	GS1_110	1230.3	18.5	11.0	12.3	16.2	74.0	25.5	78.1
83	C0	GS1_111.01	GS1_111	1008.7	18.5	10.5	11.2	13.1	76.7	25.8	71.1
84	C0	GS1_111.02	GS1_111	514.6	14.5	9.5	11.8	13.4	75.3	24.9	70.1
85	C0	GS1_111.03	GS1_111	707.2	17.0	9.0	11.4	12.6	78.8	21.0	64.7
86	C0	GS1_111.04	GS1_111	616.7	15.5	9.5	10.3	12.0	76.9	18.9	61.1
87	C0	GS1_111.05	GS1_111	723.3	16.5	9.0	11.2	14.5	79.2	21.0	66.7
88	C0	GS1_111.06	GS1_111	407.1	13.5	8.5	11.1	14.0	76.8	23.1	66.9
89	C0	GS1_112.01	GS1_112	782.5	15.5	10.0	9.9	13.8	71.6	25.3	77.6
90	C0	GS1_112.02	GS1_112	797.3	15.5	10.5	10.6	13.5	71.3	25.1	74.9
91	C0	GS1_112.03	GS1_112	760.9	15.5	9.5	10.3	13.2	69.8	25.1	76.8
92	C0	GS1_112.04	GS1_112	713.5	16.0	9.0	11.5	14.9	68.3	27.8	76.6
93	C0	GS1_112.05	GS1_112	507.1	12.0	8.5	10.8	13.8	71.9	24.7	76.5
94	C0	GS1_112.06	GS1_112	667.4	15.5	9.0	10.8	13.1	69.5	25.0	74.5
95	C0	GS1_113.01	GS1_113	402.0	11.5	8.5	13.2	16.0	70.0	29.0	77.9
96	C0	GS1_113.02	GS1_113	607.7	17.5	9.0	9.6	16.0	66.0	34.3	74.6
97	C0	GS1_113.03	GS1_113	594.4	15.5	9.0	10.8	16.0	72.0	29.8	79.5
98	C0	GS1_113.04	GS1_113	526.4	13.5	9.5	12.7	15.3	71.0	30.2	78.2
99	C0	GS1_113.05	GS1_113	610.0	15.0	9.5	11.7	16.3	72.0	28.8	76.2
100	C0	GS1_113.06	GS1_113	600.5	15.0	9.5	8.9	15.9	70.5	31.9	77.2
101	C0	GS1_114.01	GS1_114	654.7	14.5	9.5	11.9	14.4	68.7	31.0	79.4
102	C0	GS1_114.02	GS1_114	673.1	14.5	9.0	12.1	14.2	69.9	29.1	76.1
103	C0	GS1_114.03	GS1_114	733.8	15.0	9.5	11.9	14.7	68.7	31.4	77.4
104	C0	GS1_114.04	GS1_114	552.6	13.5	9.0	11.4	14.3	70.2	31.8	79.6
105	C0	GS1_114.05	GS1_114	848.2	16.0	9.5	12.0	14.7	68.8	30.5	77.6
106	C0	GS1_114.06	GS1_114	777.2	16.0	9.5	12.0	14.0	69.2	31.5	77.3
107	C0	GS1_115.01	GS1_115	574.8	15.5	8.5	11.2	14.0	71.0	24.0	74.7
108	C0	GS1_115.02	GS1_115	620.9	13.5	9.0	9.1	13.2	73.3	20.1	70.4
109	C0	GS1_115.03	GS1_115	802.8	16.5	10.0	11.0	13.0	73.0	20.9	71.6
110	C0	GS1_116.01	GS1_116	961.4	18.0	10.5	11.3	16.1	69.9	27.2	76.0
111	C0	GS1_116.02	GS1_116	942.6	17.5	10.5	11.9	17.8	72.5	22.9	72.8
112	C0	GS1_116.03	GS1_116	749.2	15.0	9.5	13.1	17.4	73.2	24.8	76.1
113	C0	GS1_116.04	GS1_116	977.3	17.0	11.0	11.5	14.9	68.6	26.7	70.6
114	C0	GS1_116.05	GS1_116	908.1	16.0	10.0	12.2	16.3	69.8	26.5	75.6
115	C0	GS1_116.06	GS1_116	877.9	15.0	11.0	11.5	11.8	71.7	24.4	73.7
116	C0	GS1_117.01	GS1_117	633.8	13.5	9.5	10.1	15.3	73.6	22.3	72.4
117	C0	GS1_117.02	GS1_117	521.4	13.5	8.0	11.1	15.5	71.2	25.5	74.5
118	C0	GS1_117.03	GS1_117	603.6	15.0	9.0	10.2	13.9	69.4	25.3	73.4
119	C0	GS1_117.04	GS1_117	532.0	12.0	9.0	10.9	13.7	73.2	24.4	77.5
120	C0	GS1_117.05	GS1_117	791.0	14.0	10.0	10.9	14.9	71.9	25.6	74.9
121	C0	GS1_117.06	GS1_117	556.0	13.5	8.5	10.8	14.7	73.0	23.1	73.0
122	C0	GS1_118.01	GS1_118	748.7	15.5	10.0	11.4	13.4	72.7	29.4	76.4
123	C0	GS1_118.02	GS1_118	854.5	16.5	10.0	12.9	19.7	74.4	28.2	74.5
124	C0	GS1_118.03	GS1_118	773.4	14.5	10.5	11.4	16.0	72.8	30.2	69.4
125	C0	GS1_118.04	GS1_118	844.6	16.5	10.5	9.5	13.4	70.5	32.0	73.8
126	C0	GS1_118.05	GS1_118	672.8	16.0	9.5	12.9	16.3	69.2	29.1	77.1
127	C0	GS1_118.06	GS1_118	585.5	13.5	9.5	11.8	13.2	71.6	29.9	78.2
128	C0	GS1_119.01	GS1_119	527.7	14.0	9.0	8.9	17.2	72.1	29.3	69.3
129	C0	GS1_119.02	GS1_119	667.7	16.0	10.0	11.7	15.4	71.5	27.8	69.4
130	C0	GS1_119.03	GS1_119	525.0	15.5	8.5	11.2	13.5	71.3	29.7	71.8
131	C0	GS1_119.04	GS1_119	541.1	14.5	9.0	11.8	15.4	70.3	30.8	75.1
132	C0	GS1_119.05	GS1_119	585.7	14.5	9.0	12.1	17.6	73.3	27.8	70.1
133	C0	GS1_119.06	GS1_119	521.2	15.0	9.0	12.1	14.5	70.6	30.0	71.2
134	C0	GS1_12.01	GS1_12	880.9	21.0	10.0	12.8	19.1	71.5	28.2	79.6
135	C0	GS1_12.02	GS1_12	695.1	18.5	9.5	11.8	18.6	73.7	25.7	78.2
136	C0	GS1_12.03	GS1_12	762.3	20.0	9.0	6.1	15.5	71.9	28.9	77.8
137	C0	GS1_12.04	GS1_12	750.8	18.5	9.5	8.0	9.9	68.4	31.1	76.4
138	C0	GS1_12.05	GS1_12	658.9	16.0	9.5	8.8	17.9	72.4	26.9	78.9
139	C0	GS1_12.06	GS1_12	487.7	14.5	9.0	10.3	16.0	71.3	27.3	74.4
140	C0	GS1_120.01	GS1_120	827.5	17.0	10.5	10.7	15.1	74.1	24.5	71.9
141	C0	GS1_120.03	GS1_120	550.9	14.5	9.0	10.6	14.2	73.0	25.2	72.0
142	C0	GS1_120.04	GS1_120	939.2	18.5	11.0	10.7	13.6	74.5	25.1	74.0
143	C0	GS1_120.05	GS1_120	1094.7	19.5	11.0	11.6	13.4	72.8	25.4	72.1
144	C0	GS1_120.06	GS1_120	767.4	15.5	10.0	11.6	14.9	74.2	25.7	70.9
145	C0	GS1_121.01	GS1_121	431.8	16.0	8.0	12.0	14.2	68.9	29.8	77.5
146	C0	GS1_121.02	GS1_121	704.5	14.0	9.5	10.6	13.2	72.8	24.2	75.6
147	C0	GS1_121.03	GS1_121	640.3	14.0	10.0	12.5	13.2	70.7	26.5	76.9
148	C0	GS1_121.04	GS1_121	417.5	14.0	7.5	11.2	15.0	71.4	26.3	77.8
149	C0	GS1_121.05	GS1_121	581.6	13.0	8.5	11.2	15.1	71.7	27.5	81.5
150	C0	GS1_121.06	GS1_121	596.4	13.5	9.0	10.3	11.8	70.0	27.3	76.3
151	C0	GS1_122.01	GS1_122	508.1	15.5	8.0	10.1	13.8	70.2	26.0	76.9
152	C0	GS1_122.02	GS1_122	515.0	13.0	8.0	12.1	18.9	71.4	30.1	81.1
153	C0	GS1_122.03	GS1_122	437.8	12.5	8.0	14.0	19.0	71.0	30.9	77.7
154	C0	GS1_122.04	GS1_122	514.7	11.5	8.0	14.0	20.8	73.3	24.7	76.9
155	C0	GS1_122.06	GS1_122	416.4	14.0	9.0	12.4	14.1	70.8	26.1	70.3
156	C0	GS1_123.01	GS1_123	473.7	14.0	8.5	11.3	15.2	67.8	26.0	74.4
157	C0	GS1_123.02	GS1_123	639.1	17.5	9.5	11.1	13.2	67.3	27.7	74.3
158	C0	GS1_123.03	GS1_123	578.8	16.0	9.0	11.0	13.0	68.7	26.1	75.1
159	C0	GS1_123.04	GS1_123	236.0	11.5	7.0	11.4	14.9	69.7	26.9	75.3
160	C0	GS1_123.05	GS1_123	504.2	14.5	9.0	11.5	14.1	68.2	25.4	75.1
161	C0	GS1_123.06	GS1_123	536.1	14.0	9.5	11.6	14.7	69.2	26.4	76.2
162	C0	GS1_124.01	GS1_124	490.2	14.5	8.5	9.9	12.0	70.1	31.9	72.0
163	C0	GS1_124.02	GS1_124	395.6	13.5	8.5	12.5	14.0	69.6	33.4	66.6
164	C0	GS1_124.03	GS1_124	627.7	15.0	10.0	10.7	12.0	71.2	31.9	70.0
165	C0	GS1_124.04	GS1_124	353.6	12.5	8.5	10.0	11.8	69.0	32.6	67.6
166	C0	GS1_124.05	GS1_124	409.5	13.5	8.0	10.1	11.1	70.5	32.1	72.0
167	C0	GS1_125.01	GS1_125	920.3	17.0	10.5	10.5	12.6	75.2	26.3	77.5
168	C0	GS1_125.02	GS1_125	792.9	16.0	10.0	11.1	13.6	73.9	25.7	79.6
169	C0	GS1_125.03	GS1_125	793.3	17.0	10.5	11.0	14.3	73.8	24.9	75.6
170	C0	GS1_125.04	GS1_125	770.9	16.0	10.0	10.7	16.6	80.5	17.2	78.8
171	C0	GS1_125.05	GS1_125	584.4	14.0	9.5	10.8	19.2	79.0	19.2	74.3
172	C0	GS1_125.06	GS1_125	772.1	16.0	10.5	11.3	13.9	72.0	25.5	78.0
173	C0	GS1_126.01	GS1_126	473.7	15.5	8.5	9.6	11.3	72.0	23.6	73.5
174	C0	GS1_126.02	GS1_126	734.4	15.5	9.5	10.8	14.8	74.8	22.9	77.0
175	C0	GS1_126.03	GS1_126	666.4	15.5	9.0	12.7	18.0	72.9	27.3	76.4
176	C0	GS1_126.04	GS1_126	542.9	15.0	8.5	9.8	12.6	73.5	24.0	79.3
177	C0	GS1_126.05	GS1_126	850.3	15.0	10.5	12.8	21.6	76.9	23.7	81.2
178	C0	GS1_126.06	GS1_126	535.2	15.5	8.0	11.2	14.2	73.0	24.3	74.4
179	C0	GS1_127.01	GS1_127	530.0	14.0	9.5	13.5	17.6	78.5	19.6	75.3
180	C0	GS1_127.02	GS1_127	642.1	17.0	9.5	11.8	13.0	71.6	26.5	77.5
181	C0	GS1_127.03	GS1_127	768.2	15.5	11.0	12.2	15.8	79.8	17.9	75.7
182	C0	GS1_127.04	GS1_127	510.6	15.5	9.0	12.0	14.0	71.9	28.0	76.4
183	C0	GS1_127.05	GS1_127	414.1	13.5	8.5	12.3	15.4	73.3	25.0	76.2
184	C0	GS1_127.06	GS1_127	387.5	12.5	8.0	13.0	19.3	78.2	21.5	83.1
185	C0	GS1_128.01	GS1_128	406.2	14.0	9.0	10.7	12.6	66.8	26.0	74.0
186	C0	GS1_128.02	GS1_128	368.8	15.0	8.0	10.0	12.5	66.4	30.7	73.2
187	C0	GS1_128.03	GS1_128	335.0	14.0	8.0	12.0	17.5	69.6	30.6	75.1
188	C0	GS1_128.04	GS1_128	288.1	14.5	7.5	10.3	13.0	68.4	29.6	76.4
189	C0	GS1_128.05	GS1_128	347.0	14.5	8.5	10.8	12.6	67.0	32.1	74.4
190	C0	GS1_128.06	GS1_128	359.0	15.5	7.5	11.0	14.1	66.7	30.9	75.8
191	C0	GS1_129.01	GS1_129	402.1	13.5	8.5	12.2	14.7	74.2	26.0	80.3
192	C0	GS1_129.02	GS1_129	470.0	13.5	8.5	12.8	14.6	71.8	29.4	77.3
193	C0	GS1_129.03	GS1_129	567.8	16.0	9.0	11.7	13.2	70.1	30.1	78.3
194	C0	GS1_129.04	GS1_129	278.9	12.0	7.5	12.2	14.1	69.6	29.7	75.6
195	C0	GS1_129.05	GS1_129	425.4	11.5	9.0	12.0	12.8	69.5	28.8	76.9
196	C0	GS1_129.06	GS1_129	460.2	13.5	9.0	11.1	13.1	68.4	27.1	74.3
197	C0	GS1_13.01	GS1_13	825.4	17.0	10.5	14.0	16.4	70.3	34.0	66.3
198	C0	GS1_13.02	GS1_13	630.5	15.0	10.5	12.6	15.6	70.3	33.9	66.1
199	C0	GS1_13.03	GS1_13	605.9	16.0	10.0	15.0	17.9	69.9	35.3	67.0
200	C0	GS1_13.04	GS1_13	859.2	17.5	10.5	13.6	16.2	71.4	33.6	65.8
201	C0	GS1_130.01	GS1_130	823.4	17.5	10.0	12.8	15.5	69.1	29.6	77.9
202	C0	GS1_130.02	GS1_130	641.9	15.5	9.5	11.9	13.8	69.0	26.9	76.5
203	C0	GS1_130.03	GS1_130	233.7	12.0	6.5	13.5	19.6	64.7	30.0	75.1
204	C0	GS1_130.04	GS1_130	773.4	16.5	10.0	12.5	15.9	69.1	29.2	75.9
205	C0	GS1_130.05	GS1_130	210.5	11.5	6.0	13.9	20.3	68.5	33.0	81.6
206	C0	GS1_130.06	GS1_130	432.6	13.5	8.0	10.8	15.9	68.5	31.4	76.8
207	C0	GS1_131.01	GS1_131	636.2	16.0	9.0	12.0	15.6	72.0	25.6	74.6
208	C0	GS1_131.02	GS1_131	319.2	11.0	7.5	11.1	16.8	72.0	27.6	76.2
209	C0	GS1_131.03	GS1_131	551.4	14.0	9.0	8.2	10.9	69.9	27.3	73.9
210	C0	GS1_131.04	GS1_131	584.8	16.0	8.5	11.5	13.0	70.5	29.2	76.2
211	C0	GS1_131.05	GS1_131	552.9	15.0	8.0	12.7	14.6	71.8	28.9	78.6
212	C0	GS1_131.06	GS1_131	539.1	15.5	9.0	9.5	11.7	69.0	27.4	75.5
213	C0	GS1_132.01	GS1_132	632.3	14.5	10.0	10.0	12.8	68.9	31.0	77.6
214	C0	GS1_132.02	GS1_132	494.7	14.5	9.5	12.3	16.6	68.6	31.5	77.6
215	C0	GS1_132.03	GS1_132	385.4	13.5	8.5	10.2	18.2	70.0	30.5	79.0
216	C0	GS1_132.04	GS1_132	410.2	12.5	9.0	11.8	15.4	70.0	30.1	80.3
217	C0	GS1_132.05	GS1_132	489.4	14.5	9.0	13.9	19.3	69.5	31.7	81.4
218	C0	GS1_132.06	GS1_132	598.1	15.0	10.5	11.4	14.0	66.1	32.5	78.2
219	C0	GS1_133.01	GS1_133	662.2	17.5	8.5	10.3	14.4	71.3	27.4	78.2
220	C0	GS1_133.02	GS1_133	712.0	18.0	9.0	12.4	17.1	71.8	25.7	77.1
221	C0	GS1_133.03	GS1_133	792.2	19.0	9.0	11.3	16.8	74.4	24.0	73.0
222	C0	GS1_133.04	GS1_133	752.9	16.5	9.0	11.5	16.1	75.1	28.6	70.8
223	C0	GS1_133.05	GS1_133	671.3	17.0	9.0	11.4	15.7	70.9	27.2	78.2
224	C0	GS1_133.06	GS1_133	773.0	19.5	8.5	11.4	14.1	73.1	27.5	74.7
225	C0	GS1_134.01	GS1_134	750.9	18.0	9.0	12.8	16.3	71.9	30.5	78.5
226	C0	GS1_134.02	GS1_134	762.4	15.5	10.5	12.2	16.2	71.9	30.0	75.8
227	C0	GS1_134.03	GS1_134	705.9	17.0	9.0	14.2	18.7	69.3	31.8	81.5
228	C0	GS1_134.04	GS1_134	914.5	18.0	10.5	13.1	19.1	69.9	31.3	78.1
229	C0	GS1_134.05	GS1_134	733.9	18.5	10.0	11.3	15.1	70.3	30.8	77.9
230	C0	GS1_134.06	GS1_134	728.8	14.5	9.5	11.4	11.9	72.4	22.7	72.6
231	C0	GS1_135.01	GS1_135	513.0	15.0	8.5	12.3	17.6	75.2	24.0	79.1
232	C0	GS1_135.02	GS1_135	473.8	13.5	8.5	12.1	16.0	76.5	22.6	74.8
233	C0	GS1_135.03	GS1_135	653.8	16.5	9.0	10.6	14.6	73.4	24.0	78.3
234	C0	GS1_135.04	GS1_135	761.1	17.5	9.0	11.9	13.7	72.4	26.8	74.1
235	C0	GS1_135.05	GS1_135	713.0	18.0	9.0	10.5	13.7	73.8	25.6	79.7
236	C0	GS1_135.06	GS1_135	964.5	18.0	10.5	11.6	13.4	73.8	24.5	74.2
237	C0	GS1_136.01	GS1_136	594.4	16.0	9.0	10.4	11.2	65.3	33.3	74.5
238	C0	GS1_136.02	GS1_136	359.8	12.5	8.0	12.4	15.8	67.3	32.7	75.4
239	C0	GS1_136.03	GS1_136	602.6	15.5	9.5	9.6	10.7	67.3	33.9	77.4
240	C0	GS1_136.04	GS1_136	233.5	12.0	6.0	12.7	15.8	67.3	30.3	74.3
241	C0	GS1_136.05	GS1_136	678.0	17.0	10.0	12.3	14.2	66.6	33.7	76.3
242	C0	GS1_136.06	GS1_136	685.8	16.5	10.0	9.8	11.4	66.6	32.3	76.5
243	C0	GS1_137.01	GS1_137	1011.6	17.5	11.5	11.8	15.7	71.3	24.4	73.3
244	C0	GS1_137.02	GS1_137	757.3	16.5	10.0	12.5	15.1	73.1	23.9	75.2
245	C0	GS1_137.03	GS1_137	616.3	16.0	10.0	12.0	14.7	71.7	23.9	73.1
246	C0	GS1_137.04	GS1_137	982.3	18.0	11.0	10.2	14.1	75.6	25.1	69.0
247	C0	GS1_137.05	GS1_137	1095.4	18.5	12.0	10.6	14.5	70.8	24.1	71.5
248	C0	GS1_137.06	GS1_137	916.8	17.5	10.5	10.7	13.6	73.4	23.7	75.8
249	C0	GS1_138.01	GS1_138	520.2	13.5	9.5	10.0	13.3	69.3	28.5	77.8
250	C0	GS1_138.02	GS1_138	745.1	16.0	9.5	11.0	18.9	70.4	29.0	76.4
251	C0	GS1_138.03	GS1_138	730.4	15.5	10.0	11.6	8.8	71.1	25.8	74.7
252	C0	GS1_138.04	GS1_138	706.9	13.5	10.0	11.0	13.0	71.4	26.9	78.6
253	C0	GS1_138.05	GS1_138	563.7	15.0	9.5	11.7	14.5	69.0	30.1	77.6
254	C0	GS1_138.06	GS1_138	526.7	14.0	9.0	11.5	15.3	68.3	30.3	75.9
255	C0	GS1_139.01	GS1_139	747.2	16.0	10.5	9.2	12.2	69.4	27.5	71.0
256	C0	GS1_139.02	GS1_139	929.9	16.5	11.5	10.6	12.8	71.5	24.7	65.7
257	C0	GS1_139.03	GS1_139	865.2	18.0	10.5	10.2	12.6	68.5	29.3	70.7
258	C0	GS1_139.04	GS1_139	859.5	16.5	11.0	10.6	11.4	70.5	26.4	65.4
259	C0	GS1_139.05	GS1_139	792.2	15.0	11.5	10.9	14.1	69.2	26.3	68.8
260	C0	GS1_139.06	GS1_139	993.2	19.5	10.0	11.4	13.5	68.8	27.1	71.4
261	C0	GS1_14.01	GS1_14	1191.3	19.5	11.5	10.0	13.7	70.6	28.9	74.8
262	C0	GS1_14.02	GS1_14	926.3	18.0	11.0	11.4	14.7	70.6	27.4	75.5
263	C0	GS1_14.03	GS1_14	1088.1	18.0	11.0	11.3	12.4	71.5	28.8	75.4
264	C0	GS1_14.04	GS1_14	524.6	14.0	9.5	12.8	14.5	69.8	30.0	76.5
265	C0	GS1_14.05	GS1_14	906.9	18.0	11.5	11.6	14.0	69.5	31.9	77.1
266	C0	GS1_14.06	GS1_14	1022.8	17.0	11.0	10.5	12.7	69.2	29.4	77.0
267	C0	GS1_140.01	GS1_140	1306.5	20.0	11.5	13.9	15.9	70.8	29.9	79.3
268	C0	GS1_140.02	GS1_140	676.7	17.5	9.5	14.7	18.4	68.3	34.6	78.5
269	C0	GS1_140.03	GS1_140	811.3	18.0	10.0	14.5	14.0	70.7	29.0	77.0
270	C0	GS1_140.04	GS1_140	909.0	18.0	11.0	13.6	17.3	69.6	32.2	77.2
271	C0	GS1_140.05	GS1_140	917.4	18.0	11.0	14.0	17.7	71.5	29.6	82.4
272	C0	GS1_141.01	GS1_141	420.4	14.5	8.5	10.0	14.5	67.8	27.2	77.2
273	C0	GS1_141.02	GS1_141	832.9	15.5	10.5	12.6	15.6	69.3	27.3	75.2
274	C0	GS1_141.03	GS1_141	556.6	14.5	8.5	10.3	13.2	70.8	27.3	75.1
275	C0	GS1_141.04	GS1_141	801.5	16.5	10.0	10.6	14.3	71.9	26.6	79.7
276	C0	GS1_141.05	GS1_141	411.5	13.0	8.0	9.0	12.4	69.7	29.2	76.6
277	C0	GS1_141.06	GS1_141	560.1	14.5	9.0	11.7	15.2	70.2	28.4	80.9
278	C0	GS1_142.01	GS1_142	1026.8	20.5	10.5	11.3	14.6	71.0	29.8	79.2
279	C0	GS1_142.02	GS1_142	1108.1	20.0	10.5	11.9	14.4	70.2	29.5	79.3
280	C0	GS1_142.03	GS1_142	870.4	19.5	11.0	12.1	16.4	69.7	30.7	79.6
281	C0	GS1_142.04	GS1_142	452.4	17.0	7.5	8.0	9.2	70.3	29.1	76.1
282	C0	GS1_142.05	GS1_142	407.7	14.0	7.5	10.6	12.2	68.7	30.2	77.5
283	C0	GS1_142.06	GS1_142	1021.6	18.5	10.0	12.2	14.3	69.3	27.9	76.5
284	C0	GS1_143.01	GS1_143	955.2	16.0	11.0	13.0	14.3	71.7	29.3	78.6
285	C0	GS1_143.02	GS1_143	904.6	17.0	11.0	12.5	15.9	66.7	28.7	74.5
286	C0	GS1_143.03	GS1_143	797.4	16.0	10.5	10.2	12.0	68.8	28.2	75.6
287	C0	GS1_143.04	GS1_143	722.4	14.5	10.5	13.1	14.9	69.5	29.4	76.7
288	C0	GS1_143.05	GS1_143	455.5	11.5	8.5	11.4	18.8	70.6	30.4	81.2
289	C0	GS1_143.06	GS1_143	178.4	9.5	6.5	12.6	16.7	65.0	34.1	75.2
290	C0	GS1_144.01	GS1_144	686.7	15.0	9.5	11.6	16.2	72.8	27.4	74.7
291	C0	GS1_144.02	GS1_144	923.5	18.0	10.5	11.4	14.9	70.8	30.3	77.9
292	C0	GS1_144.03	GS1_144	538.4	14.5	8.5	13.0	19.5	71.1	29.3	76.1
293	C0	GS1_144.04	GS1_144	713.6	17.0	9.5	11.3	15.0	69.6	31.6	78.7
294	C0	GS1_144.05	GS1_144	853.3	17.0	10.0	11.8	16.0	72.0	28.9	81.4
295	C0	GS1_144.06	GS1_144	1033.7	18.0	11.0	13.3	18.0	70.9	30.0	77.0
296	C0	GS1_145.01	GS1_145	788.8	17.5	10.5	11.5	17.0	71.0	31.4	79.5
297	C0	GS1_145.02	GS1_145	608.8	16.0	9.0	11.9	16.4	69.9	31.8	80.4
298	C0	GS1_145.03	GS1_145	927.3	17.5	10.5	11.0	15.5	71.0	32.0	77.2
299	C0	GS1_145.04	GS1_145	562.0	16.0	8.5	9.9	13.0	69.0	32.8	78.1
300	C0	GS1_145.05	GS1_145	661.7	16.5	10.5	10.8	16.3	73.7	27.5	83.9
301	C0	GS1_145.06	GS1_145	528.8	14.5	9.5	10.5	12.6	69.8	33.0	79.3
302	C0	GS1_146.01	GS1_146	768.5	15.5	9.0	9.9	11.9	72.1	25.0	76.6
303	C0	GS1_146.02	GS1_146	711.9	14.5	10.0	10.9	14.5	70.3	32.0	78.3
304	C0	GS1_146.03	GS1_146	832.1	15.5	9.5	10.6	12.2	70.2	25.1	75.4
305	C0	GS1_146.04	GS1_146	652.7	14.0	10.5	9.5	14.5	67.3	29.1	76.8
306	C0	GS1_146.05	GS1_146	1235.8	17.0	11.0	11.1	15.0	71.0	28.5	79.3
307	C0	GS1_146.06	GS1_146	639.7	13.5	10.0	12.0	14.2	69.1	27.8	76.4
308	C0	GS1_147.01	GS1_147	740.3	17.0	10.0	14.0	16.3	70.1	31.6	80.8
309	C0	GS1_147.02	GS1_147	321.1	10.0	8.0	11.4	17.3	75.9	26.2	84.0
310	C0	GS1_147.03	GS1_147	877.8	17.5	10.5	12.3	15.0	70.7	31.2	77.2
311	C0	GS1_147.04	GS1_147	782.8	17.5	9.5	11.5	13.1	69.6	29.5	78.4
312	C0	GS1_147.05	GS1_147	730.6	15.0	10.0	11.6	14.0	73.7	29.1	78.6
313	C0	GS1_147.06	GS1_147	793.1	18.5	9.0	11.3	14.5	71.3	31.0	79.5
314	C0	GS1_148.01	GS1_148	811.6	16.5	10.0	11.3	14.0	70.2	26.2	76.6
315	C0	GS1_148.02	GS1_148	487.0	13.5	8.0	11.3	14.2	68.7	27.5	77.0
316	C0	GS1_148.03	GS1_148	470.1	14.0	8.5	11.5	13.6	69.4	26.0	74.1
317	C0	GS1_148.04	GS1_148	504.8	14.5	8.0	10.8	14.0	69.3	26.0	77.4
318	C0	GS1_148.05	GS1_148	470.2	13.5	8.5	11.3	12.5	70.8	26.9	75.2
319	C0	GS1_148.06	GS1_148	1120.3	15.5	11.0	11.6	13.5	71.0	28.1	79.0
320	C0	GS1_149.01	GS1_149	802.0	14.5	9.0	9.9	12.5	72.6	27.7	79.6
321	C0	GS1_149.02	GS1_149	1083.3	16.5	10.0	12.0	14.7	70.6	30.3	78.7
322	C0	GS1_149.03	GS1_149	603.0	14.0	8.5	11.8	14.8	70.5	29.2	72.2
323	C0	GS1_149.04	GS1_149	561.1	13.5	8.0	13.0	15.7	70.5	31.1	73.5
324	C0	GS1_149.05	GS1_149	559.3	13.0	8.5	11.8	13.6	70.8	31.0	73.6
325	C0	GS1_149.06	GS1_149	438.4	12.0	8.5	13.1	15.8	70.1	28.4	75.4
326	C0	GS1_15.01	GS1_15	765.3	15.5	10.0	12.8	17.3	71.2	29.9	80.1
327	C0	GS1_15.02	GS1_15	589.9	16.0	9.0	14.5	17.0	68.3	34.0	79.8
328	C0	GS1_15.03	GS1_15	608.1	14.5	10.0	12.8	19.3	73.7	25.6	82.8
329	C0	GS1_15.04	GS1_15	779.2	15.5	10.0	13.0	14.9	68.7	31.9	77.9
330	C0	GS1_15.05	GS1_15	781.1	16.0	9.5	13.5	20.5	73.0	29.2	84.2
331	C0	GS1_15.06	GS1_15	549.2	13.5	9.5	12.9	16.3	69.2	28.4	80.5
332	C0	GS1_151.01	GS1_151	833.0	18.0	10.5	12.3	17.1	70.5	29.8	83.0
333	C0	GS1_151.02	GS1_151	860.3	17.0	10.5	12.4	17.1	69.9	29.8	81.9
334	C0	GS1_151.03	GS1_151	1506.3	22.5	12.0	12.0	15.8	73.2	28.8	81.8
335	C0	GS1_151.04	GS1_151	1171.0	20.0	11.5	11.9	14.1	70.0	31.3	80.4
336	C0	GS1_151.05	GS1_151	784.3	16.5	11.0	12.5	19.8	71.9	29.2	80.8
337	C0	GS1_151.06	GS1_151	1058.0	21.5	10.5	8.3	10.1	68.8	31.5	78.2
338	C0	GS1_152.01	GS1_152	764.5	16.0	10.5	12.5	14.8	73.7	28.5	70.3
339	C0	GS1_152.02	GS1_152	670.2	15.0	10.0	9.3	10.7	72.9	27.6	67.7
340	C0	GS1_152.03	GS1_152	586.1	16.0	9.5	10.0	11.8	73.1	27.9	67.6
341	C0	GS1_152.04	GS1_152	532.1	14.0	10.0	11.7	14.5	73.1	27.6	65.3
342	C0	GS1_152.05	GS1_152	411.5	13.0	9.0	12.9	17.1	69.3	30.7	71.9
343	C0	GS1_152.06	GS1_152	267.2	11.5	7.5	11.5	13.9	72.2	28.1	68.1
344	C0	GS1_153.01	GS1_153	787.7	18.0	9.0	11.7	11.5	70.9	28.8	72.5
345	C0	GS1_153.02	GS1_153	1020.6	18.5	10.0	11.8	12.7	72.9	28.8	71.0
346	C0	GS1_153.03	GS1_153	594.2	17.0	9.0	11.2	11.8	71.8	27.3	74.6
347	C0	GS1_153.04	GS1_153	994.2	20.5	10.0	9.9	10.2	72.9	27.5	70.4
348	C0	GS1_153.05	GS1_153	827.2	17.5	10.0	11.5	12.7	73.8	26.7	71.1
349	C0	GS1_153.06	GS1_153	763.0	16.5	9.5	11.2	14.0	75.4	25.8	69.0
350	C0	GS1_154.01	GS1_154	975.0	21.0	10.5	7.5	10.5	70.4	29.0	79.9
351	C0	GS1_154.02	GS1_154	652.6	18.0	9.5	9.1	11.1	68.8	29.5	77.2
352	C0	GS1_154.03	GS1_154	1080.8	20.5	11.0	9.1	9.8	70.4	28.5	78.0
353	C0	GS1_154.04	GS1_154	1284.9	21.5	11.5	9.7	12.0	74.3	27.0	81.6
354	C0	GS1_154.05	GS1_154	393.3	16.0	8.0	11.2	15.6	70.8	25.4	77.4
355	C0	GS1_154.06	GS1_154	811.3	17.5	10.5	10.7	12.8	73.0	24.7	73.9
356	C0	GS1_155.01	GS1_155	828.4	18.0	10.0	14.0	17.0	71.7	27.1	74.2
357	C0	GS1_155.02	GS1_155	666.7	14.5	9.0	13.1	16.5	71.1	27.6	71.4
358	C0	GS1_155.03	GS1_155	629.1	16.5	9.0	13.4	15.9	71.7	29.7	75.7
359	C0	GS1_155.04	GS1_155	567.4	16.0	8.5	13.8	18.9	71.2	29.5	72.5
360	C0	GS1_155.05	GS1_155	476.3	16.0	8.0	11.2	13.5	70.4	30.4	71.7
361	C0	GS1_155.06	GS1_155	588.4	17.5	8.5	12.2	14.7	70.0	30.5	76.4
362	C0	GS1_156.01	GS1_156	810.7	19.0	10.5	11.8	13.7	71.4	28.7	77.1
363	C0	GS1_156.02	GS1_156	223.2	11.0	7.0	9.7	11.7	70.6	32.0	78.2
364	C0	GS1_156.03	GS1_156	437.3	14.5	9.0	12.2	13.1	70.7	26.7	73.5
365	C0	GS1_156.04	GS1_156	512.8	15.5	9.0	12.6	17.1	71.9	26.8	74.9
366	C0	GS1_156.05	GS1_156	345.7	14.0	8.0	12.6	15.6	70.0	29.0	72.2
367	C0	GS1_156.06	GS1_156	614.1	16.5	9.5	13.1	17.0	71.2	28.0	76.6
368	C0	GS1_157.01	GS1_157	414.2	14.5	8.5	11.8	14.4	71.6	25.3	73.9
369	C0	GS1_157.02	GS1_157	1023.4	17.5	10.5	11.0	16.3	71.9	26.5	77.2
370	C0	GS1_157.03	GS1_157	437.9	13.0	8.5	11.4	15.4	73.6	24.8	72.5
371	C0	GS1_157.04	GS1_157	613.1	15.0	8.5	10.8	14.2	72.0	27.5	76.0
372	C0	GS1_157.05	GS1_157	344.7	12.0	8.0	11.8	13.5	74.1	24.8	72.5
373	C0	GS1_157.06	GS1_157	474.3	13.5	8.5	10.7	14.0	74.0	24.2	73.4
374	C0	GS1_158.01	GS1_158	1024.7	21.0	11.5	11.3	13.3	69.2	28.4	75.5
375	C0	GS1_158.02	GS1_158	841.0	20.5	10.5	13.0	14.8	73.5	25.7	73.8
376	C0	GS1_158.03	GS1_158	845.1	22.0	9.5	11.8	15.1	72.8	25.4	73.7
377	C0	GS1_158.04	GS1_158	1117.8	22.5	11.0	10.8	12.7	72.4	25.7	73.2
378	C0	GS1_158.05	GS1_158	1011.8	22.0	10.5	10.7	13.1	72.7	24.6	73.7
379	C0	GS1_158.06	GS1_158	619.3	19.0	9.5	13.5	18.3	71.9	26.8	81.1
380	C0	GS1_159.01	GS1_159	592.0	15.5	9.0	9.2	12.4	71.8	28.5	75.3
381	C0	GS1_159.02	GS1_159	585.7	17.0	8.0	11.2	13.4	70.3	30.3	74.8
382	C0	GS1_159.03	GS1_159	485.0	15.0	8.0	11.8	13.5	68.7	31.2	75.4
383	C0	GS1_159.04	GS1_159	555.5	13.5	9.0	13.1	14.7	73.2	28.2	76.3
384	C0	GS1_159.05	GS1_159	403.5	14.0	7.5	13.4	19.0	70.3	30.8	77.6
385	C0	GS1_159.06	GS1_159	356.1	12.0	8.0	10.2	13.1	69.3	28.6	75.5
386	C0	GS1_16.01	GS1_16	729.5	16.0	10.0	12.4	15.7	70.7	29.4	77.7
387	C0	GS1_16.02	GS1_16	645.3	15.0	9.5	11.8	17.2	71.0	30.0	78.8
388	C0	GS1_16.03	GS1_16	644.4	15.0	9.5	12.6	15.4	70.5	30.0	78.8
389	C0	GS1_16.04	GS1_16	456.2	12.5	8.0	11.7	17.7	74.8	26.2	76.5
390	C0	GS1_16.05	GS1_16	537.2	15.0	8.5	12.8	19.5	74.6	24.6	79.4
391	C0	GS1_16.06	GS1_16	571.6	15.5	10.0	13.8	16.8	66.5	33.9	79.2
392	C0	GS1_160.1	GS1_160	724.3	16.0	9.5	10.1	12.2	72.4	25.9	76.8
393	C0	GS1_160.2	GS1_160	525.1	15.5	9.0	10.5	13.1	73.5	24.8	77.8
394	C0	GS1_160.3	GS1_160	547.1	15.0	9.5	9.5	11.5	71.2	25.2	76.1
395	C0	GS1_160.4	GS1_160	465.7	14.5	8.5	11.8	14.9	71.5	25.3	76.6
396	C0	GS1_160.5	GS1_160	690.6	18.5	9.5	11.7	17.1	70.6	29.2	78.2
397	C0	GS1_160.6	GS1_160	510.5	16.0	8.5	10.8	14.3	71.2	27.7	77.7
398	C0	GS1_161.01	GS1_161	561.8	19.5	8.5	9.1	10.0	72.1	28.5	74.6
399	C0	GS1_161.02	GS1_161	354.0	15.5	7.5	13.5	15.3	73.1	27.6	72.0
400	C0	GS1_161.03	GS1_161	659.1	20.0	8.5	13.5	16.2	72.8	28.2	74.8
401	C0	GS1_161.04	GS1_161	266.4	15.0	6.5	12.8	14.7	71.0	28.3	74.6
402	C0	GS1_161.05	GS1_161	615.1	17.0	9.5	11.2	11.2	70.6	27.5	68.8
403	C0	GS1_161.06	GS1_161	690.1	20.0	9.5	10.1	11.0	71.5	27.5	72.1
404	C0	GS1_162.01	GS1_162	852.1	19.5	10.5	9.0	11.1	68.7	28.9	75.7
405	C0	GS1_162.02	GS1_162	610.3	18.0	8.5	13.8	16.0	69.2	30.7	77.1
406	C0	GS1_162.03	GS1_162	628.5	18.5	9.0	10.0	13.0	73.4	25.5	70.3
407	C0	GS1_162.04	GS1_162	525.9	17.0	8.5	10.9	15.7	72.1	30.6	72.6
408	C0	GS1_162.05	GS1_162	397.0	14.0	7.5	13.2	15.2	74.0	26.6	70.9
409	C0	GS1_163.01	GS1_163	602.2	15.0	9.5	11.6	15.5	71.8	30.1	69.6
410	C0	GS1_163.02	GS1_163	396.3	12.5	8.5	12.7	17.1	71.0	31.1	70.7
411	C0	GS1_163.03	GS1_163	359.6	10.5	9.0	12.8	17.6	71.6	29.6	74.1
412	C0	GS1_163.04	GS1_163	543.9	14.5	9.0	12.6	15.0	73.5	27.4	65.3
413	C0	GS1_163.05	GS1_163	579.6	15.5	9.0	11.4	16.0	71.5	31.6	66.6
414	C0	GS1_163.06	GS1_163	464.1	13.5	8.5	12.7	16.0	71.9	30.3	68.3
415	C0	GS1_164.01	GS1_164	565.9	13.5	9.5	12.2	15.6	73.6	26.8	75.4
416	C0	GS1_164.02	GS1_164	614.6	17.5	9.0	11.7	13.9	70.5	31.3	81.0
417	C0	GS1_164.03	GS1_164	655.0	15.5	9.5	11.7	17.9	72.3	27.1	80.5
418	C0	GS1_164.04	GS1_164	409.6	15.0	7.5	12.2	18.5	71.4	31.3	79.8
419	C0	GS1_164.05	GS1_164	577.5	15.5	9.5	12.1	16.8	72.9	27.5	80.6
420	C0	GS1_164.06	GS1_164	367.4	12.5	8.5	11.4	15.4	75.1	23.0	79.9
421	C0	GS1_165.01	GS1_165	515.1	15.0	8.0	13.9	21.4	73.9	26.9	77.5
422	C0	GS1_165.02	GS1_165	922.1	18.5	11.0	13.0	17.9	75.7	24.6	76.5
423	C0	GS1_165.03	GS1_165	602.8	15.0	9.5	11.0	15.9	75.6	25.1	73.8
424	C0	GS1_165.04	GS1_165	594.4	16.0	9.0	10.8	13.5	77.1	25.6	70.0
425	C0	GS1_165.05	GS1_165	486.0	14.0	8.0	10.8	13.8	76.5	26.0	69.8
426	C0	GS1_165.06	GS1_165	711.8	18.5	8.0	14.2	20.7	74.6	27.6	79.8
427	C0	GS1_166.01	GS1_166	538.7	15.5	9.0	12.0	16.8	70.3	31.2	81.4
428	C0	GS1_166.02	GS1_166	762.9	14.5	9.5	11.6	21.7	76.4	25.4	82.7
429	C0	GS1_166.03	GS1_166	674.3	17.0	10.0	12.6	14.9	71.4	29.4	76.8
430	C0	GS1_166.04	GS1_166	729.0	17.0	10.0	12.0	13.1	72.2	28.4	78.1
431	C0	GS1_166.05	GS1_166	490.8	15.0	8.5	9.4	15.8	70.3	30.0	79.5
432	C0	GS1_166.06	GS1_166	791.9	17.0	10.5	12.4	14.5	69.7	30.3	74.2
433	C0	GS1_167.01	GS1_167	1424.1	21.0	11.5	11.4	17.1	71.3	28.2	73.2
434	C0	GS1_167.02	GS1_167	667.2	16.0	9.0	12.9	16.5	73.9	29.1	75.2
435	C0	GS1_167.03	GS1_167	1197.5	18.5	11.5	12.7	15.7	71.2	30.6	79.2
436	C0	GS1_167.04	GS1_167	732.8	17.0	8.5	13.1	17.5	71.8	30.4	75.7
437	C0	GS1_167.05	GS1_167	830.9	17.5	9.0	13.4	15.5	71.7	28.2	72.2
438	C0	GS1_167.06	GS1_167	597.1	17.0	8.5	11.9	18.0	72.3	28.6	80.8
439	C0	GS1_168.01	GS1_168	794.1	15.5	10.0	10.8	16.2	70.6	30.1	78.8
440	C0	GS1_168.02	GS1_168	490.4	14.5	9.0	13.2	17.6	71.0	30.8	82.0
441	C0	GS1_168.03	GS1_168	473.1	12.5	9.0	13.7	19.2	70.5	28.8	80.9
442	C0	GS1_168.04	GS1_168	475.5	13.0	9.0	12.6	16.7	70.6	29.0	81.8
443	C0	GS1_168.05	GS1_168	624.6	13.5	10.5	13.3	17.8	71.1	27.2	78.6
444	C0	GS1_168.06	GS1_168	714.4	14.5	10.0	10.5	12.2	72.1	27.4	73.1
445	C0	GS1_169.01	GS1_169	781.8	19.0	10.0	9.7	12.2	73.4	22.8	74.9
446	C0	GS1_169.02	GS1_169	582.8	17.0	9.0	12.1	13.5	71.4	25.0	73.8
447	C0	GS1_169.03	GS1_169	612.8	17.5	9.0	13.2	19.7	73.4	24.0	73.5
448	C0	GS1_169.04	GS1_169	638.8	19.0	9.0	8.2	11.0	68.6	26.2	73.9
449	C0	GS1_169.05	GS1_169	580.3	17.5	9.0	13.3	19.2	73.1	25.1	77.2
450	C0	GS1_169.06	GS1_169	783.1	18.0	10.5	7.9	9.3	71.1	24.1	73.6
451	C0	GS1_17.01	GS1_17	758.8	18.5	9.0	10.1	13.3	70.9	28.9	79.5
452	C0	GS1_17.02	GS1_17	676.5	15.0	9.5	12.1	15.1	71.2	28.3	78.5
453	C0	GS1_17.03	GS1_17	598.5	16.0	8.0	10.1	15.1	70.6	28.3	75.2
454	C0	GS1_17.04	GS1_17	637.7	19.5	9.0	10.7	15.0	68.7	31.6	75.7
455	C0	GS1_17.05	GS1_17	630.9	18.0	9.0	11.7	15.0	71.3	28.2	74.6
456	C0	GS1_17.06	GS1_17	577.5	16.0	9.0	10.8	14.1	69.2	30.2	75.9
457	C0	GS1_170.01	GS1_170	1067.8	17.5	10.0	11.6	13.7	73.1	23.4	72.8
458	C0	GS1_170.01	GS1_170	1028.2	17.5	10.5	11.1	13.6	73.5	22.4	66.6
459	C0	GS1_170.02	GS1_170	715.5	14.5	10.0	10.9	13.4	71.8	23.3	75.1
460	C0	GS1_170.02	GS1_170	811.2	16.0	10.5	11.5	14.4	72.5	24.2	74.0
461	C0	GS1_170.03	GS1_170	654.2	14.0	9.5	10.9	14.6	74.1	23.6	73.8
462	C0	GS1_170.03	GS1_170	788.3	16.5	10.0	12.1	13.3	69.9	26.2	73.7
463	C0	GS1_170.04	GS1_170	663.2	16.0	9.5	11.9	17.7	71.6	25.7	79.5
464	C0	GS1_170.04	GS1_170	1047.6	17.0	11.0	11.8	14.2	72.9	25.2	74.9
465	C0	GS1_170.05	GS1_170	647.8	16.0	8.5	11.7	13.0	70.2	24.2	72.3
466	C0	GS1_170.05	GS1_170	1301.0	19.5	12.0	9.9	10.8	73.8	21.8	64.3
467	C0	GS1_170.06	GS1_170	787.2	16.0	10.0	11.1	14.4	71.4	25.7	77.6
468	C0	GS1_170.06	GS1_170	894.0	17.0	10.5	12.8	15.5	71.9	25.4	75.8
469	C0	GS1_171.01	GS1_171	467.0	14.0	8.0	12.0	17.6	72.3	27.1	76.7
470	C0	GS1_171.01	GS1_171	582.7	14.5	9.5	13.2	15.4	69.8	28.8	74.4
471	C0	GS1_171.02	GS1_171	407.4	12.5	8.5	11.9	16.3	69.0	27.4	76.8
472	C0	GS1_171.02	GS1_171	495.4	14.5	8.5	12.6	15.7	68.8	28.9	76.1
473	C0	GS1_171.03	GS1_171	528.7	13.5	9.5	10.2	14.6	71.7	25.5	71.4
474	C0	GS1_171.03	GS1_171	696.9	14.5	9.5	12.5	16.7	71.7	27.6	76.5
475	C0	GS1_171.04	GS1_171	380.1	12.5	7.5	13.4	19.5	72.6	26.6	68.2
476	C0	GS1_171.04	GS1_171	473.0	14.0	8.5	13.0	17.5	66.7	27.9	74.3
477	C0	GS1_171.05	GS1_171	576.4	14.5	8.5	13.0	15.1	71.2	29.9	77.0
478	C0	GS1_171.05	GS1_171	600.2	14.5	9.0	11.5	14.6	72.1	27.8	74.4
479	C0	GS1_171.06	GS1_171	496.5	15.0	8.0	12.7	15.3	71.9	27.7	71.6
480	C0	GS1_171.06	GS1_171	293.6	13.5	7.0	11.5	14.6	68.9	29.8	76.2
481	C0	GS1_172.01	GS1_172	466.1	15.5	9.0	12.9	22.9	73.4	27.0	82.6
482	C0	GS1_172.02	GS1_172	602.7	15.0	9.0	11.2	16.7	72.2	26.8	80.8
483	C0	GS1_172.04	GS1_172	507.7	13.5	9.0	13.3	21.7	74.4	25.4	81.6
484	C0	GS1_172.05	GS1_172	786.9	17.0	9.5	7.7	15.0	71.2	29.0	80.5
485	C0	GS1_172.06	GS1_172	850.7	17.5	10.0	11.7	13.8	71.8	29.2	79.4
486	C0	GS1_173.01	GS1_173	408.4	16.0	8.0	14.3	22.3	72.5	30.7	79.1
487	C0	GS1_173.02	GS1_173	466.2	14.0	8.5	11.6	15.3	73.2	28.1	74.9
488	C0	GS1_173.03	GS1_173	661.6	17.0	10.0	12.2	15.1	71.1	28.1	76.9
489	C0	GS1_173.04	GS1_173	439.3	14.5	9.0	12.7	13.8	71.1	27.4	78.7
490	C0	GS1_173.05	GS1_173	505.5	13.5	9.0	12.3	16.3	72.2	27.4	79.9
491	C0	GS1_173.06	GS1_173	621.5	16.5	9.5	11.3	17.3	73.1	25.5	80.2
492	C0	GS1_174.01	GS1_174	610.1	15.5	9.5	15.0	19.0	72.4	30.7	77.0
493	C0	GS1_174.02	GS1_174	855.6	16.5	10.5	12.2	16.7	70.4	27.7	81.4
494	C0	GS1_174.03	GS1_174	838.4	15.0	11.0	10.8	16.2	72.8	28.1	77.2
495	C0	GS1_174.04	GS1_174	816.7	16.5	10.0	13.0	18.4	72.9	27.7	82.7
496	C0	GS1_174.05	GS1_174	733.5	13.5	11.0	12.2	17.5	73.0	27.0	83.2
497	C0	GS1_175.01	GS1_175	294.5	12.0	7.5	11.4	18.1	71.9	27.1	73.3
498	C0	GS1_175.02	GS1_175	461.4	14.5	8.0	10.0	14.9	72.1	27.3	70.9
499	C0	GS1_175.03	GS1_175	459.0	13.5	8.5	10.7	17.5	72.6	26.4	72.2
500	C0	GS1_175.04	GS1_175	732.2	14.5	10.5	11.2	17.5	73.6	24.7	74.2
501	C0	GS1_175.05	GS1_175	638.9	15.0	9.0	10.8	17.5	75.4	22.2	68.0
502	C0	GS1_175.06	GS1_175	606.5	15.0	9.0	10.7	16.1	73.9	23.9	70.7
503	C0	GS1_176.01	GS1_176	503.9	14.0	8.5	11.8	17.2	73.1	23.6	78.1
504	C0	GS1_176.02	GS1_176	534.0	12.5	9.0	9.9	15.8	70.2	24.9	81.2
505	C0	GS1_176.03	GS1_176	658.7	14.5	9.5	9.6	14.7	71.8	25.1	79.8
506	C0	GS1_176.04	GS1_176	622.1	14.0	9.0	10.4	13.8	72.5	24.5	76.7
507	C0	GS1_176.05	GS1_176	540.4	13.0	8.5	13.0	15.4	71.8	23.9	73.8
508	C0	GS1_176.06	GS1_176	557.5	14.5	8.0	12.1	14.5	69.6	25.8	78.6
509	C0	GS1_177.01	GS1_177	805.1	16.0	9.5	11.5	18.0	70.5	30.2	81.4
510	C0	GS1_177.02	GS1_177	574.7	14.0	9.0	11.6	15.5	73.2	24.6	79.0
511	C0	GS1_177.03	GS1_177	933.1	16.0	10.0	11.1	13.2	71.4	28.4	79.5
512	C0	GS1_177.04	GS1_177	242.1	11.5	6.0	12.1	19.8	73.8	30.0	78.3
513	C0	GS1_177.05	GS1_177	575.0	15.0	8.5	11.4	16.5	73.0	28.5	78.7
514	C0	GS1_177.06	GS1_177	578.0	12.0	9.0	14.2	16.8	73.5	27.1	81.5
515	C0	GS1_178.01	GS1_178	749.2	17.0	10.0	12.6	14.6	70.8	26.8	80.8
516	C0	GS1_178.02	GS1_178	659.4	17.0	9.5	10.7	17.1	71.0	27.6	82.4
517	C0	GS1_178.03	GS1_178	578.5	15.0	9.5	11.0	15.4	71.5	26.6	82.9
518	C0	GS1_178.04	GS1_178	841.1	18.0	10.0	6.2	11.9	71.8	25.9	78.1
519	C0	GS1_178.05	GS1_178	525.8	15.5	9.0	12.4	15.2	67.7	29.5	79.0
520	C0	GS1_178.06	GS1_178	604.2	15.0	9.0	10.6	12.2	69.7	29.2	79.6
521	C0	GS1_179.01	GS1_179	704.7	16.5	9.5	12.3	15.0	69.8	31.9	79.5
522	C0	GS1_179.02	GS1_179	441.0	14.0	8.0	14.5	17.6	70.3	29.8	78.3
523	C0	GS1_179.03	GS1_179	814.8	16.0	9.5	13.1	15.3	69.2	32.0	79.4
524	C0	GS1_179.04	GS1_179	710.5	16.5	9.0	14.2	18.5	68.7	32.2	78.2
525	C0	GS1_179.05	GS1_179	572.8	16.0	8.5	13.3	20.7	69.3	31.0	79.9
526	C0	GS1_179.06	GS1_179	747.4	17.5	10.0	13.8	22.0	70.6	29.5	79.6
527	C0	GS1_18.01	GS1_18	535.6	14.5	9.0	12.8	17.4	70.0	30.0	74.9
528	C0	GS1_18.02	GS1_18	645.4	15.5	9.0	12.2	15.6	70.3	28.8	74.3
529	C0	GS1_18.03	GS1_18	576.3	14.0	9.0	10.9	14.9	70.9	30.9	74.6
530	C0	GS1_18.04	GS1_18	938.3	18.0	10.5	9.7	14.4	71.2	29.5	79.1
531	C0	GS1_18.05	GS1_18	548.9	14.5	9.0	13.4	19.4	72.2	27.7	79.3
532	C0	GS1_18.06	GS1_18	550.5	15.0	8.0	13.2	19.2	71.7	27.5	80.5
533	C0	GS1_180.1	GS1_180	867.5	17.5	9.5	10.3	14.2	73.7	27.2	74.4
534	C0	GS1_180.2	GS1_180	801.9	15.0	10.0	10.0	12.3	71.8	21.8	73.2
535	C0	GS1_180.3	GS1_180	728.8	15.5	10.0	10.3	12.5	71.6	28.3	77.1
536	C0	GS1_180.4	GS1_180	553.6	14.5	9.0	10.8	14.2	73.2	27.4	75.1
537	C0	GS1_180.5	GS1_180	590.7	15.0	9.0	11.1	12.8	73.9	26.8	78.6
538	C0	GS1_180.6	GS1_180	678.5	15.5	9.0	10.8	12.4	70.5	29.6	75.8
539	C0	GS1_181.01	GS1_181	806.2	17.5	9.5	10.9	14.2	71.6	28.9	75.2
540	C0	GS1_181.02	GS1_181	547.0	15.0	8.5	11.7	15.1	70.1	30.3	76.8
541	C0	GS1_181.03	GS1_181	506.3	15.5	9.0	12.0	15.4	69.9	29.6	76.3
542	C0	GS1_181.04	GS1_181	666.9	16.5	9.0	11.5	14.9	70.5	30.5	76.7
543	C0	GS1_181.05	GS1_181	655.2	15.5	9.0	11.9	14.1	72.4	27.4	76.3
544	C0	GS1_181.06	GS1_181	510.0	14.0	9.0	13.2	15.6	70.2	31.9	74.6
545	C0	GS1_182.01	GS1_182	1376.9	17.0	12.0	11.2	13.1	73.1	24.7	73.0
546	C0	GS1_182.02	GS1_182	1061.1	17.0	10.0	11.4	14.3	73.4	24.1	72.8
547	C0	GS1_182.03	GS1_182	546.7	14.0	9.0	12.8	13.0	71.8	26.1	73.9
548	C0	GS1_182.04	GS1_182	1390.0	21.0	11.0	10.4	11.6	71.6	26.3	76.0
549	C0	GS1_182.05	GS1_182	869.1	16.0	10.0	10.9	13.4	75.9	24.0	75.2
550	C0	GS1_182.06	GS1_182	723.5	15.5	10.5	12.5	14.6	71.6	27.8	76.9
551	C0	GS1_183.01	GS1_183	712.4	18.0	10.0	10.2	11.3	68.9	30.4	76.6
552	C0	GS1_183.02	GS1_183	870.7	19.0	10.5	9.6	13.1	71.7	30.6	80.9
553	C0	GS1_183.03	GS1_183	708.4	17.0	9.5	10.1	13.9	70.1	30.6	79.4
554	C0	GS1_183.04	GS1_183	597.5	16.5	9.5	7.6	9.5	68.8	31.6	78.1
555	C0	GS1_183.05	GS1_183	767.8	17.5	10.0	8.3	9.7	69.6	30.8	77.9
556	C0	GS1_184.01	GS1_184	974.5	16.0	11.5	10.7	12.4	72.4	28.7	79.4
557	C0	GS1_184.02	GS1_184	862.3	16.0	10.0	12.5	13.9	72.1	30.7	79.5
558	C0	GS1_184.03	GS1_184	832.6	16.0	10.5	10.5	17.4	78.5	22.1	86.2
559	C0	GS1_184.04	GS1_184	912.4	15.0	11.0	10.6	18.8	76.5	23.4	83.3
560	C0	GS1_184.05	GS1_184	976.8	17.0	11.0	12.5	13.3	72.0	28.8	80.5
561	C0	GS1_184.06	GS1_184	1051.0	19.0	10.5	11.0	13.2	66.4	33.2	78.3
562	C0	GS1_185.01	GS1_185	672.0	17.0	10.0	10.9	13.9	72.7	28.3	76.5
563	C0	GS1_185.02	GS1_185	535.6	13.0	9.5	9.0	16.3	73.6	27.2	68.2
564	C0	GS1_185.03	GS1_185	584.5	18.0	9.0	10.5	15.2	74.5	24.3	76.3
565	C0	GS1_185.04	GS1_185	505.2	15.5	9.0	11.5	15.2	70.5	30.4	72.2
566	C0	GS1_185.05	GS1_185	577.2	15.0	9.5	10.8	15.6	72.4	28.0	73.6
567	C0	GS1_185.06	GS1_185	529.0	16.5	8.0	13.2	14.9	69.5	33.4	73.0
568	C0	GS1_186.01	GS1_186	708.3	15.5	10.0	10.6	12.1	74.4	25.6	67.1
569	C0	GS1_186.01	GS1_186	1102.2	19.0	11.5	12.7	17.5	69.9	33.0	76.7
570	C0	GS1_186.02	GS1_186	560.7	15.0	9.0	13.6	15.2	72.3	26.9	66.0
571	C0	GS1_186.02	GS1_186	679.1	16.5	9.5	12.7	16.2	70.8	30.7	78.1
572	C0	GS1_186.03	GS1_186	605.9	14.5	9.5	10.7	14.0	73.9	22.6	64.4
573	C0	GS1_186.03	GS1_186	527.0	14.0	8.0	12.3	17.7	70.2	34.2	78.3
574	C0	GS1_186.04	GS1_186	589.0	16.5	10.0	10.0	13.5	70.6	23.6	70.2
575	C0	GS1_186.04	GS1_186	722.8	15.5	9.0	13.2	16.2	68.4	31.8	77.3
576	C0	GS1_186.05	GS1_186	527.8	15.5	9.0	11.0	16.6	77.0	22.9	68.0
577	C0	GS1_186.06	GS1_186	805.2	18.5	9.5	12.1	14.3	72.0	27.5	69.6
578	C0	GS1_187.01	GS1_187	765.1	16.5	10.0	12.9	14.0	72.0	26.6	75.5
579	C0	GS1_187.02	GS1_187	653.1	21.5	8.5	13.9	19.4	71.0	27.8	81.1
580	C0	GS1_187.03	GS1_187	543.6	16.5	9.5	12.5	20.6	73.8	24.7	81.2
581	C0	GS1_187.04	GS1_187	548.4	15.5	9.0	12.7	17.2	70.0	29.4	78.5
582	C0	GS1_187.05	GS1_187	352.5	16.0	8.0	10.8	15.5	72.4	23.6	78.1
583	C0	GS1_187.06	GS1_187	465.4	16.5	8.5	11.0	12.8	70.9	26.6	75.6
584	C0	GS1_188.01	GS1_188	357.5	16.0	7.0	9.6	11.4	67.0	32.2	76.1
585	C0	GS1_188.02	GS1_188	1058.0	22.0	10.5	12.9	16.1	69.4	31.3	78.5
586	C0	GS1_188.03	GS1_188	568.0	19.5	9.0	10.7	12.6	64.4	30.6	74.1
587	C0	GS1_188.04	GS1_188	865.1	20.5	10.0	12.9	15.6	72.2	29.8	80.5
588	C0	GS1_189.01	GS1_189	679.4	17.0	9.5	11.3	14.5	70.4	28.0	77.3
589	C0	GS1_189.02	GS1_189	1076.6	21.0	10.5	10.8	14.7	71.0	28.3	79.4
590	C0	GS1_189.03	GS1_189	796.2	17.0	9.5	9.1	10.2	72.4	26.6	75.3
591	C0	GS1_189.04	GS1_189	577.3	16.0	8.0	10.6	14.6	70.1	30.4	77.7
592	C0	GS1_189.05	GS1_189	663.9	17.5	9.0	10.9	12.6	69.9	29.4	74.5
593	C0	GS1_189.06	GS1_189	803.3	17.0	9.0	10.2	12.7	71.5	28.8	77.2
594	C0	GS1_19.01	GS1_19	595.4	16.0	9.0	12.5	15.3	69.9	31.0	79.8
595	C0	GS1_19.02	GS1_19	682.4	15.5	9.0	10.4	15.8	73.2	27.9	78.0
596	C0	GS1_19.03	GS1_19	891.9	17.0	10.0	9.5	16.6	71.6	29.4	80.0
597	C0	GS1_19.04	GS1_19	576.0	14.5	9.0	13.8	16.6	70.6	30.1	78.3
598	C0	GS1_19.05	GS1_19	839.1	17.5	9.5	8.6	13.3	69.1	33.2	78.1
599	C0	GS1_19.06	GS1_19	872.3	16.0	10.0	12.4	15.0	70.7	29.7	80.4
600	C0	GS1_190.01	GS1_190	512.3	14.0	8.0	12.3	17.4	71.8	26.9	77.5
601	C0	GS1_190.02	GS1_190	594.2	14.5	9.0	10.8	13.3	72.7	24.2	73.7
602	C0	GS1_190.03	GS1_190	676.6	14.5	9.0	11.8	17.7	72.4	26.6	76.5
603	C0	GS1_190.04	GS1_190	514.5	13.0	8.5	12.8	17.1	72.0	26.6	76.9
604	C0	GS1_190.05	GS1_190	619.6	15.0	9.0	11.6	16.9	72.2	25.9	74.7
605	C0	GS1_190.06	GS1_190	689.5	15.5	9.5	11.4	14.4	71.9	26.5	76.6
606	C0	GS1_191.02	GS1_191	398.5	16.5	8.0	9.4	12.8	68.9	33.5	77.1
607	C0	GS1_192.01	GS1_192	721.2	18.5	9.0	10.8	13.4	72.6	27.2	81.5
608	C0	GS1_192.02	GS1_192	329.7	13.5	7.0	10.5	14.5	76.5	22.4	74.1
609	C0	GS1_192.03	GS1_192	1061.4	19.0	10.5	11.2	15.2	75.2	22.8	80.8
610	C0	GS1_192.04	GS1_192	824.7	14.5	10.0	9.7	12.9	72.1	28.6	77.5
611	C0	GS1_192.05	GS1_192	791.4	15.5	10.5	10.7	15.1	74.3	24.2	79.7
612	C0	GS1_192.06	GS1_192	667.4	16.0	10.0	11.4	12.7	75.8	23.0	76.9
613	C0	GS1_193.01	GS1_193	625.7	16.0	9.0	9.9	12.0	74.0	24.6	71.5
614	C0	GS1_193.02	GS1_193	734.8	16.0	9.5	9.8	11.5	75.0	24.1	74.1
615	C0	GS1_193.03	GS1_193	747.7	17.0	9.0	10.7	12.5	72.9	27.4	75.4
616	C0	GS1_193.04	GS1_193	729.4	18.0	9.5	9.8	10.3	73.6	25.2	75.6
617	C0	GS1_193.05	GS1_193	436.8	15.5	8.0	11.4	13.6	71.6	27.3	75.0
618	C0	GS1_193.06	GS1_193	616.7	16.0	9.0	9.8	12.1	73.1	26.0	79.2
619	C0	GS1_194.01	GS1_194	582.3	14.0	9.5	10.9	16.2	74.6	27.3	77.7
620	C0	GS1_194.02	GS1_194	969.4	17.0	10.0	11.7	14.8	71.6	29.2	76.4
621	C0	GS1_194.03	GS1_194	581.2	16.0	8.5	11.0	15.0	69.4	28.9	76.5
622	C0	GS1_194.04	GS1_194	460.8	14.0	8.5	11.0	16.0	71.3	29.5	79.0
623	C0	GS1_194.05	GS1_194	682.5	15.5	9.5	10.6	13.5	72.6	27.0	77.1
624	C0	GS1_194.06	GS1_194	660.8	14.5	9.5	10.9	12.3	72.5	27.2	75.1
625	C0	GS1_195.01	GS1_195	535.1	13.5	8.0	13.3	17.8	68.2	31.3	80.6
626	C0	GS1_195.02	GS1_195	530.7	12.5	9.0	15.0	19.2	67.8	32.9	80.9
627	C0	GS1_195.03	GS1_195	693.6	14.0	9.0	13.4	18.4	69.5	29.5	76.5
628	C0	GS1_195.04	GS1_195	878.1	16.0	9.5	12.1	15.3	67.6	33.3	78.6
629	C0	GS1_195.05	GS1_195	550.5	14.5	9.0	13.7	17.7	66.9	33.3	78.8
630	C0	GS1_195.06	GS1_195	462.0	14.5	8.5	13.4	17.9	64.2	35.5	74.4
631	C0	GS1_196.01	GS1_196	653.1	14.5	9.5	12.4	15.4	69.9	30.5	77.4
632	C0	GS1_196.02	GS1_196	420.3	13.0	8.0	8.7	9.8	68.7	32.0	75.2
633	C0	GS1_196.03	GS1_196	579.3	15.0	9.0	12.2	15.3	69.7	31.2	77.5
634	C0	GS1_196.04	GS1_196	503.2	13.0	8.5	9.1	10.7	68.5	32.3	76.9
635	C0	GS1_196.05	GS1_196	637.5	14.5	9.0	9.0	9.8	69.5	29.5	73.8
636	C0	GS1_196.06	GS1_196	457.2	14.0	8.0	7.9	9.6	69.0	32.4	75.9
637	C0	GS1_197.01	GS1_197	698.6	15.0	9.5	13.9	18.2	71.4	33.8	81.4
638	C0	GS1_197.02	GS1_197	853.6	16.0	10.0	10.8	15.2	74.8	25.8	82.7
639	C0	GS1_197.03	GS1_197	470.3	14.5	8.0	14.6	23.5	72.9	31.4	80.7
640	C0	GS1_197.04	GS1_197	915.2	16.0	10.5	11.8	14.3	77.3	24.5	80.8
641	C0	GS1_197.05	GS1_197	803.5	16.0	8.5	13.9	16.0	69.9	30.8	80.6
642	C0	GS1_197.06	GS1_197	590.4	14.0	8.5	11.1	16.0	71.0	29.3	79.2
643	C0	GS1_198.01	GS1_198	610.0	16.0	9.5	11.8	18.6	72.9	27.8	74.4
644	C0	GS1_198.02	GS1_198	635.1	16.0	10.0	11.3	18.2	73.9	27.4	72.7
645	C0	GS1_198.03	GS1_198	855.4	18.5	9.0	12.4	16.4	71.9	28.9	72.7
646	C0	GS1_198.04	GS1_198	787.1	19.0	10.0	14.2	19.9	69.7	31.2	75.7
647	C0	GS1_198.05	GS1_198	483.2	16.0	9.5	11.5	18.3	69.0	28.8	75.9
648	C0	GS1_199.01	GS1_199	835.0	17.0	9.0	12.4	17.5	72.1	31.0	75.5
649	C0	GS1_199.02	GS1_199	1038.7	17.0	10.5	11.7	17.4	69.8	29.6	72.9
650	C0	GS1_199.03	GS1_199	797.2	17.5	9.0	14.6	18.3	70.1	31.1	75.8
651	C0	GS1_199.04	GS1_199	738.8	17.0	9.0	11.2	17.8	70.3	31.7	76.1
652	C0	GS1_199.05	GS1_199	813.9	20.0	9.5	12.2	14.5	70.5	30.3	77.1
653	C0	GS1_199.06	GS1_199	663.2	17.0	9.0	12.8	14.7	70.1	32.0	69.3
654	C0	GS1_2.01	GS1_2	983.9	16.5	11.0	10.7	15.4	72.6	25.7	77.3
655	C0	GS1_2.02	GS1_2	1048.4	15.5	11.5	12.0	15.5	72.5	25.9	79.8
656	C0	GS1_2.03	GS1_2	908.9	15.5	11.0	11.0	15.1	73.2	26.3	75.4
657	C0	GS1_2.04	GS1_2	795.6	16.0	10.0	12.4	15.2	72.4	25.4	74.5
658	C0	GS1_2.05	GS1_2	760.7	13.5	11.0	12.8	19.4	72.4	27.1	80.0
659	C0	GS1_2.06	GS1_2	980.6	17.0	11.0	12.0	15.0	70.2	29.4	79.2
660	C0	GS1_20.01	GS1_20	777.8	18.5	10.0	11.7	16.5	74.2	26.7	75.6
661	C0	GS1_20.02	GS1_20	639.0	17.0	10.0	11.2	16.4	72.9	24.1	75.9
662	C0	GS1_20.03	GS1_20	933.4	18.0	10.5	12.6	16.3	74.9	25.0	74.6
663	C0	GS1_20.04	GS1_20	655.0	16.5	9.5	14.4	19.4	71.0	29.3	77.6
664	C0	GS1_20.05	GS1_20	923.4	19.5	10.0	12.1	18.4	73.4	27.3	79.7
665	C0	GS1_20.06	GS1_20	750.9	18.0	9.5	12.8	17.1	69.7	29.8	76.3
666	C0	GS1_200.01	GS1_200	836.8	18.0	10.5	12.7	20.0	73.0	27.0	76.8
667	C0	GS1_200.02	GS1_200	1210.2	21.5	10.5	11.8	17.9	73.9	26.7	76.2
668	C0	GS1_200.03	GS1_200	1382.1	20.0	12.0	11.5	18.4	71.2	28.3	77.7
669	C0	GS1_200.04	GS1_200	1065.6	19.5	11.0	10.8	15.7	71.7	28.7	80.1
670	C0	GS1_200.05	GS1_200	1184.1	19.5	13.0	11.1	15.8	73.5	26.3	79.8
671	C0	GS1_200.06	GS1_200	981.5	20.0	11.5	11.6	16.3	72.8	27.6	80.3
672	C0	GS1_201.01	GS1_201	502.7	13.0	8.5	9.2	11.5	73.4	23.5	73.5
673	C0	GS1_201.02	GS1_201	709.5	16.5	9.0	10.2	13.8	72.8	25.4	77.5
674	C0	GS1_201.03	GS1_201	648.7	14.0	8.5	9.9	13.3	73.5	24.5	74.5
675	C0	GS1_201.04	GS1_201	516.4	14.0	8.5	9.3	12.0	73.6	20.8	70.2
676	C0	GS1_201.05	GS1_201	660.1	16.5	8.5	9.9	12.0	74.2	23.8	68.3
677	C0	GS1_201.06	GS1_201	444.8	13.5	8.0	10.0	11.2	72.7	21.5	68.6
678	C0	GS1_202.01	GS1_202	651.4	16.0	10.0	12.0	13.4	70.7	23.6	71.5
679	C0	GS1_202.02	GS1_202	664.8	13.5	10.0	10.8	13.4	72.9	23.3	71.5
680	C0	GS1_202.03	GS1_202	861.1	15.0	10.5	11.0	12.7	71.5	21.8	72.9
681	C0	GS1_202.04	GS1_202	960.9	16.0	10.5	11.2	15.0	71.9	23.7	75.6
682	C0	GS1_202.05	GS1_202	1481.5	19.5	12.0	10.4	12.6	71.2	27.9	74.7
683	C0	GS1_202.06	GS1_202	458.2	11.5	9.5	12.0	13.6	70.6	25.1	76.7
684	C0	GS1_203.01	GS1_203	686.8	16.5	9.0	14.2	16.6	67.9	32.9	78.2
685	C0	GS1_203.02	GS1_203	462.6	12.5	9.0	13.2	14.7	73.1	22.6	74.1
686	C0	GS1_203.03	GS1_203	446.6	12.0	9.0	11.5	16.2	72.4	22.9	77.4
687	C0	GS1_203.04	GS1_203	718.4	15.5	10.0	9.8	14.7	70.9	22.8	78.4
688	C0	GS1_203.05	GS1_203	863.0	15.5	10.5	10.0	12.8	72.9	23.9	75.7
689	C0	GS1_203.06	GS1_203	750.5	14.5	10.0	10.2	13.1	72.5	24.9	79.1
690	C0	GS1_204.01	GS1_204	387.4	14.0	8.0	11.7	14.5	71.4	25.2	70.4
691	C0	GS1_204.02	GS1_204	1267.2	20.5	12.0	9.5	11.5	70.7	27.0	73.7
692	C0	GS1_204.03	GS1_204	788.8	19.5	10.0	12.5	13.8	73.5	24.3	75.4
693	C0	GS1_204.04	GS1_204	538.7	15.5	9.0	10.2	11.4	74.9	22.6	65.5
694	C0	GS1_205.01	GS1_205	379.0	11.5	8.0	13.0	15.4	66.1	32.3	75.5
695	C0	GS1_205.02	GS1_205	594.4	15.5	8.5	11.9	13.6	64.9	35.1	75.9
696	C0	GS1_205.03	GS1_205	770.3	13.5	10.0	12.0	13.4	68.5	30.5	76.8
697	C0	GS1_205.04	GS1_205	325.5	11.5	7.5	12.7	13.6	66.1	34.6	76.2
698	C0	GS1_205.05	GS1_205	489.4	12.5	9.0	13.4	14.8	69.3	32.4	78.3
699	C0	GS1_205.06	GS1_205	779.6	15.0	10.5	12.4	15.9	67.5	30.6	77.0
700	C0	GS1_206.01	GS1_206	452.2	15.0	9.0	13.0	14.8	69.7	29.2	77.4
701	C0	GS1_206.02	GS1_206	609.8	15.5	9.5	11.8	15.1	69.3	30.0	75.0
702	C0	GS1_206.03	GS1_206	669.0	15.5	10.0	11.4	14.1	71.5	28.1	75.0
703	C0	GS1_206.04	GS1_206	663.8	15.5	10.0	10.4	12.4	68.7	29.4	75.4
704	C0	GS1_206.05	GS1_206	420.2	12.0	8.5	10.5	12.2	70.5	30.2	76.5
705	C0	GS1_206.06	GS1_206	806.9	18.0	10.5	11.6	13.7	69.4	30.4	75.3
706	C0	GS1_207.01	GS1_207	617.3	16.5	9.5	11.4	13.3	70.5	26.4	79.4
707	C0	GS1_207.02	GS1_207	667.2	18.0	9.0	10.9	13.5	67.6	27.7	76.2
708	C0	GS1_207.03	GS1_207	585.6	14.0	9.0	10.7	12.0	70.6	24.3	76.2
709	C0	GS1_207.04	GS1_207	715.2	17.5	9.5	10.6	13.9	70.3	24.9	74.3
710	C0	GS1_207.05	GS1_207	758.0	16.5	10.5	10.7	14.2	68.0	22.6	71.1
711	C0	GS1_207.06	GS1_207	728.3	17.0	9.5	10.4	12.3	70.6	24.6	75.4
712	C0	GS1_208.01	GS1_208	848.0	16.0	10.0	8.9	11.1	70.4	30.1	80.4
713	C0	GS1_208.02	GS1_208	522.0	12.5	9.0	10.0	15.0	72.9	25.7	82.3
714	C0	GS1_208.03	GS1_208	326.7	10.0	7.5	10.1	12.5	68.5	32.4	80.0
715	C0	GS1_208.04	GS1_208	884.0	16.0	10.0	10.0	15.2	71.7	29.1	81.6
716	C0	GS1_208.05	GS1_208	557.6	14.0	9.5	11.0	13.6	70.9	28.2	81.4
717	C0	GS1_208.06	GS1_208	636.7	14.0	9.0	11.2	15.9	73.1	26.7	84.4
718	C0	GS1_209.01	GS1_209	758.7	17.0	10.5	10.9	13.3	70.7	30.5	79.0
719	C0	GS1_209.02	GS1_209	891.6	16.5	11.0	11.4	14.3	72.7	29.1	73.7
720	C0	GS1_209.03	GS1_209	776.6	19.5	9.5	11.8	15.5	71.5	28.5	76.5
721	C0	GS1_209.04	GS1_209	751.9	18.0	9.5	10.2	12.3	71.5	31.1	78.6
722	C0	GS1_209.05	GS1_209	851.2	18.5	10.5	11.5	13.6	69.0	31.0	79.8
723	C0	GS1_209.06	GS1_209	503.6	17.5	8.5	10.7	12.9	70.4	30.3	78.6
724	C0	GS1_21.01	GS1_21	1078.3	18.0	11.0	12.2	10.7	75.9	21.7	67.5
725	C0	GS1_21.02	GS1_21	1096.4	18.5	10.5	11.4	14.1	74.5	22.8	73.7
726	C0	GS1_21.03	GS1_21	954.6	18.5	10.0	11.3	13.8	74.3	23.4	69.9
727	C0	GS1_21.04	GS1_21	916.0	18.0	10.5	9.9	13.8	73.7	23.8	70.7
728	C0	GS1_21.05	GS1_21	636.6	15.5	9.5	11.4	14.2	73.0	24.9	73.0
729	C0	GS1_21.06	GS1_21	1001.7	18.0	11.0	11.8	15.6	73.8	23.1	69.8
730	C0	GS1_210.01	GS1_210	480.0	14.0	9.0	13.2	16.1	70.2	32.3	74.8
731	C0	GS1_210.02	GS1_210	801.6	17.0	10.0	11.1	16.5	70.1	29.1	78.9
732	C0	GS1_210.03	GS1_210	711.0	16.5	10.0	11.9	15.0	68.8	29.2	76.3
733	C0	GS1_210.04	GS1_210	940.6	18.5	10.5	10.1	14.4	73.3	29.9	80.3
734	C0	GS1_210.05	GS1_210	812.5	16.5	10.5	11.4	14.1	71.6	28.4	76.2
735	C0	GS1_210.06	GS1_210	719.9	17.0	10.5	12.3	14.6	69.5	29.9	78.8
736	C0	GS1_211.01	GS1_211	208.7	13.0	5.5	11.6	15.6	67.8	33.4	76.1
737	C0	GS1_211.02	GS1_211	276.0	13.0	7.0	11.1	15.9	69.5	28.5	77.5
738	C0	GS1_211.03	GS1_211	386.6	15.0	8.0	12.0	14.7	67.6	28.3	75.5
739	C0	GS1_211.04	GS1_211	515.0	16.5	8.5	12.0	14.5	68.4	29.8	77.0
740	C0	GS1_211.05	GS1_211	317.1	13.0	7.0	12.0	15.6	71.1	26.1	78.7
741	C0	GS1_211.06	GS1_211	204.1	12.0	5.5	12.7	16.4	72.0	26.1	76.3
742	C0	GS1_212.01	GS1_212	511.4	15.0	9.0	9.0	11.7	77.9	19.4	64.6
743	C0	GS1_212.02	GS1_212	684.7	17.0	9.5	11.1	14.8	77.0	22.3	68.4
744	C0	GS1_212.03	GS1_212	361.2	14.5	8.5	11.1	15.6	76.9	23.4	71.8
745	C0	GS1_212.04	GS1_212	270.2	13.5	7.0	13.8	16.9	73.8	25.0	77.4
746	C0	GS1_212.05	GS1_212	488.8	14.5	8.5	9.5	16.9	72.2	25.9	77.7
747	C0	GS1_212.06	GS1_212	715.4	16.0	10.0	10.4	13.0	76.5	21.3	67.5
748	C0	GS1_22.01	GS1_22	482.7	14.5	8.5	7.5	7.9	73.0	26.7	72.8
749	C0	GS1_22.02	GS1_22	554.8	15.5	9.0	9.9	14.3	70.3	28.9	76.0
750	C0	GS1_22.03	GS1_22	775.8	16.0	10.0	10.5	12.9	74.5	27.0	69.6
751	C0	GS1_22.04	GS1_22	737.8	17.5	9.5	10.2	11.9	75.2	24.3	68.4
752	C0	GS1_22.05	GS1_22	452.7	15.0	8.0	9.9	15.8	72.8	28.9	73.1
753	C0	GS1_22.06	GS1_22	756.3	17.0	10.0	10.1	11.3	75.4	24.5	67.4
754	C0	GS1_23.01	GS1_23	943.4	17.5	10.0	11.7	14.3	75.2	27.8	76.0
755	C0	GS1_23.02	GS1_23	941.9	17.0	11.0	10.5	14.4	74.1	27.8	72.7
756	C0	GS1_23.03	GS1_23	908.8	18.0	11.0	8.2	9.5	71.6	29.7	77.1
757	C0	GS1_23.04	GS1_23	751.6	17.0	10.0	11.0	12.4	73.1	28.4	73.6
758	C0	GS1_23.05	GS1_23	1008.8	17.5	11.0	10.2	12.8	73.9	27.4	74.0
759	C0	GS1_23.06	GS1_23	664.2	15.0	10.5	11.1	16.0	73.9	24.3	75.4
760	C0	GS1_24.01	GS1_24	1654.4	20.5	12.0	10.0	15.8	70.3	29.0	81.1
761	C0	GS1_24.02	GS1_24	1047.9	18.0	11.0	10.2	15.8	74.9	23.9	82.7
762	C0	GS1_24.03	GS1_24	1110.2	16.0	12.0	9.8	14.6	74.7	25.5	84.0
763	C0	GS1_24.04	GS1_24	1524.8	19.0	11.0	14.8	16.2	69.6	24.5	73.3
764	C0	GS1_24.05	GS1_24	1169.2	16.0	11.5	14.1	14.6	72.4	24.3	76.9
765	C0	GS1_24.06	GS1_24	1159.6	17.0	11.5	12.8	13.9	74.3	24.5	82.3
766	C0	GS1_25.01	GS1_25	946.4	18.5	10.5	11.0	13.0	76.8	23.7	71.0
767	C0	GS1_25.02	GS1_25	789.7	17.0	10.0	8.8	9.8	75.4	24.4	72.0
768	C0	GS1_25.03	GS1_25	729.3	17.5	10.0	11.6	14.4	73.8	25.3	76.3
769	C0	GS1_25.04	GS1_25	695.9	18.0	9.5	9.9	13.2	72.5	27.1	74.1
770	C0	GS1_25.05	GS1_25	719.5	18.0	9.5	12.6	15.7	74.8	25.2	74.3
771	C0	GS1_25.06	GS1_25	741.0	17.5	10.0	12.8	15.3	76.0	24.6	75.7
772	C0	GS1_26.01	GS1_26	707.8	15.0	9.5	13.4	17.2	71.4	28.0	74.3
773	C0	GS1_26.02	GS1_26	592.2	14.0	10.0	13.0	15.7	71.0	30.4	75.8
774	C0	GS1_26.03	GS1_26	548.1	14.5	8.5	13.8	17.8	73.2	27.3	72.7
775	C0	GS1_26.04	GS1_26	580.8	14.0	9.5	13.1	16.4	73.1	28.2	72.1
776	C0	GS1_26.05	GS1_26	671.3	16.0	9.0	13.0	15.9	73.2	27.9	71.2
777	C0	GS1_26.06	GS1_26	894.8	16.5	10.0	13.6	17.6	72.4	26.7	72.7
778	C0	GS1_27.01	GS1_27	607.3	17.0	9.5	14.3	17.5	73.6	27.4	73.6
779	C0	GS1_27.02	GS1_27	998.5	21.5	10.5	12.5	14.2	73.7	24.7	75.6
780	C0	GS1_27.03	GS1_27	663.7	17.5	10.5	9.2	14.7	72.7	26.8	80.0
781	C0	GS1_27.04	GS1_27	699.5	18.5	9.5	11.7	14.6	73.3	25.3	74.9
782	C0	GS1_27.05	GS1_27	891.7	20.0	10.5	11.0	15.0	73.2	28.4	77.0
783	C0	GS1_27.06	GS1_27	900.6	20.0	11.0	11.3	13.8	71.7	26.2	76.2
784	C0	GS1_28.01	GS1_28	666.9	14.5	10.0	16.1	19.3	68.0	32.8	78.0
785	C0	GS1_28.02	GS1_28	597.1	13.0	10.0	13.9	20.4	68.7	32.5	77.6
786	C0	GS1_28.03	GS1_28	690.3	13.0	10.0	15.3	19.2	69.5	31.7	78.4
787	C0	GS1_29.01	GS1_29	743.3	14.5	10.0	11.8	13.7	70.5	26.5	76.6
788	C0	GS1_29.02	GS1_29	698.0	13.5	10.0	10.7	16.3	70.9	26.9	78.0
789	C0	GS1_29.03	GS1_29	795.8	14.0	10.5	12.7	15.5	68.8	28.4	78.0
790	C0	GS1_29.04	GS1_29	589.1	13.0	9.5	13.4	17.2	70.6	28.5	80.2
791	C0	GS1_29.05	GS1_29	676.5	13.0	10.0	8.8	14.7	71.6	27.8	78.6
792	C0	GS1_29.06	GS1_29	668.5	13.0	9.5	10.6	16.0	70.8	26.4	77.0
793	C0	GS1_3.01	GS1_3	724.9	17.0	9.5	11.3	14.5	68.0	28.1	77.0
794	C0	GS1_3.02	GS1_3	577.9	16.0	8.0	11.9	16.6	71.7	26.6	78.1
795	C0	GS1_3.03	GS1_3	469.5	14.0	8.5	12.2	14.2	68.6	30.3	76.9
796	C0	GS1_3.04	GS1_3	709.9	18.5	9.5	12.3	16.3	67.9	32.3	77.3
797	C0	GS1_3.05	GS1_3	620.6	17.5	9.0	13.2	20.8	71.6	27.6	78.2
798	C0	GS1_3.06	GS1_3	411.4	13.0	8.5	12.0	15.9	73.9	28.0	75.9
799	C0	GS1_30.01	GS1_30	1090.3	20.0	11.0	11.4	15.4	67.2	27.5	75.0
800	C0	GS1_30.02	GS1_30	879.0	18.5	10.5	7.5	15.7	69.3	26.8	78.0
801	C0	GS1_30.03	GS1_30	810.5	16.5	10.5	9.4	12.9	71.2	28.1	77.5
802	C0	GS1_30.04	GS1_30	791.8	18.0	9.5	11.4	15.8	68.6	28.9	78.2
803	C0	GS1_30.05	GS1_30	873.8	17.0	10.5	10.3	13.8	70.1	27.7	77.6
804	C0	GS1_30.06	GS1_30	945.2	19.0	10.0	11.1	14.5	69.0	29.3	77.4
805	C0	GS1_31.01	GS1_31	607.8	15.5	9.5	8.8	18.9	73.7	27.4	76.6
806	C0	GS1_31.02	GS1_31	295.7	12.5	8.5	11.1	18.7	73.4	26.1	83.2
807	C0	GS1_31.03	GS1_31	432.3	16.0	8.5	11.7	13.8	69.6	29.3	77.9
808	C0	GS1_31.04	GS1_31	680.8	16.5	9.5	12.4	16.3	72.0	28.4	80.0
809	C0	GS1_31.05	GS1_31	458.5	14.5	8.5	10.8	13.8	69.0	30.5	79.3
810	C0	GS1_31.06	GS1_31	439.7	16.0	8.0	9.4	11.3	67.7	31.5	77.6
811	C0	GS1_32.01	GS1_32	840.6	16.0	10.0	12.1	15.3	71.8	30.6	76.5
812	C0	GS1_32.02	GS1_32	589.6	15.5	9.0	12.7	14.8	68.6	33.0	74.3
813	C0	GS1_32.03	GS1_32	713.1	16.0	9.5	11.7	13.0	72.1	33.0	77.0
814	C0	GS1_32.04	GS1_32	640.6	17.0	9.0	11.2	14.9	70.9	30.0	78.5
815	C0	GS1_32.05	GS1_32	639.8	17.5	9.5	8.8	14.8	71.7	33.8	74.8
816	C0	GS1_32.06	GS1_32	564.7	17.0	8.5	11.6	14.1	71.8	31.6	74.2
817	C0	GS1_33.01	GS1_33	624.5	15.5	9.0	13.2	16.4	68.8	30.2	78.7
818	C0	GS1_33.02	GS1_33	751.5	13.5	10.5	12.0	14.7	70.3	30.2	79.4
819	C0	GS1_33.03	GS1_33	720.3	15.5	10.5	13.0	16.1	68.9	31.4	78.9
820	C0	GS1_33.04	GS1_33	483.1	14.0	8.5	11.3	14.2	68.2	30.9	79.5
821	C0	GS1_33.05	GS1_33	1202.0	18.5	11.5	12.2	14.7	70.1	30.4	80.7
822	C0	GS1_33.06	GS1_33	918.5	17.5	10.0	11.3	14.4	70.3	29.5	79.1
823	C0	GS1_34.01	GS1_34	794.1	15.0	11.5	12.0	16.3	69.0	29.6	76.5
824	C0	GS1_34.02	GS1_34	701.7	16.5	10.0	11.4	15.1	67.6	31.1	79.1
825	C0	GS1_34.03	GS1_34	983.4	19.0	10.5	12.4	14.3	67.2	31.7	74.3
826	C0	GS1_34.04	GS1_34	549.1	15.0	9.0	13.4	19.9	69.7	30.8	78.5
827	C0	GS1_34.05	GS1_34	950.6	16.0	10.5	11.8	12.4	69.3	32.1	74.6
828	C0	GS1_34.06	GS1_34	761.8	16.5	10.5	10.8	14.6	70.6	30.0	79.0
829	C0	GS1_35.01	GS1_35	534.1	14.5	9.0	11.1	14.1	73.8	21.4	70.3
830	C0	GS1_35.02	GS1_35	515.2	16.0	8.0	10.5	12.7	71.6	27.9	76.2
831	C0	GS1_35.03	GS1_35	652.4	15.5	9.0	9.7	11.3	73.5	25.2	73.7
832	C0	GS1_35.04	GS1_35	694.9	15.5	9.5	10.5	13.4	75.5	20.7	70.1
833	C0	GS1_35.05	GS1_35	668.5	17.0	9.0	8.9	11.3	72.7	24.6	75.8
834	C0	GS1_35.06	GS1_35	651.9	14.5	10.0	12.7	14.8	73.7	25.1	75.2
835	C0	GS1_36.01	GS1_36	549.1	13.0	8.5	12.9	14.6	73.8	23.9	75.0
836	C0	GS1_36.02	GS1_36	788.8	14.5	10.5	11.8	13.0	74.0	24.0	73.2
837	C0	GS1_36.03	GS1_36	688.2	15.0	9.5	12.2	14.7	72.8	25.5	77.0
838	C0	GS1_36.04	GS1_36	506.8	14.0	8.5	11.7	14.6	73.3	26.2	77.0
839	C0	GS1_36.05	GS1_36	556.2	13.5	8.5	11.3	14.4	72.8	25.9	75.9
840	C0	GS1_36.06	GS1_36	543.7	11.0	9.0	10.3	12.8	72.5	26.1	77.6
841	C0	GS1_37.01	GS1_37	547.6	13.0	8.5	12.8	14.9	69.1	30.0	77.3
842	C0	GS1_37.02	GS1_37	535.9	13.0	8.5	10.0	11.9	67.3	33.6	76.4
843	C0	GS1_37.03	GS1_37	549.0	15.0	9.0	12.4	15.5	67.1	30.5	76.9
844	C0	GS1_37.04	GS1_37	580.0	14.0	9.0	10.0	12.7	67.9	28.2	75.2
845	C0	GS1_37.05	GS1_37	538.4	14.5	9.0	11.8	13.6	67.4	30.1	75.2
846	C0	GS1_37.06	GS1_37	602.5	13.0	8.5	13.1	18.0	68.6	31.1	80.8
847	C0	GS1_38.01	GS1_38	786.0	14.5	10.5	11.6	17.2	72.7	26.0	77.7
848	C0	GS1_38.02	GS1_38	848.5	15.5	11.0	11.9	16.9	70.6	27.6	79.1
849	C0	GS1_38.03	GS1_38	957.9	14.0	11.5	12.0	23.6	73.2	26.1	82.6
850	C0	GS1_38.04	GS1_38	381.4	11.0	8.5	10.0	17.6	78.9	17.2	82.5
851	C0	GS1_38.05	GS1_38	847.6	15.5	11.0	10.9	15.4	71.7	27.0	77.5
852	C0	GS1_38.06	GS1_38	839.8	15.0	11.0	11.6	16.7	71.4	27.0	79.7
853	C0	GS1_39.01	GS1_39	404.7	16.0	8.0	12.6	15.8	68.1	32.5	75.2
854	C0	GS1_39.02	GS1_39	431.8	16.5	8.0	14.7	24.0	72.0	29.5	75.4
855	C0	GS1_39.03	GS1_39	443.8	16.0	9.0	13.4	20.0	71.4	29.0	72.8
856	C0	GS1_39.04	GS1_39	365.1	13.5	8.0	14.8	24.9	70.9	31.8	74.5
857	C0	GS1_39.05	GS1_39	497.2	17.0	8.5	10.0	12.6	71.2	27.5	72.6
858	C0	GS1_39.06	GS1_39	315.4	13.5	7.5	12.3	17.9	68.5	30.9	76.7
859	C0	GS1_4.01	GS1_4	633.4	14.5	9.0	12.2	18.2	74.2	27.2	84.5
860	C0	GS1_4.02	GS1_4	546.6	14.5	8.0	11.6	16.6	75.4	26.4	83.0
861	C0	GS1_4.03	GS1_4	835.8	16.0	10.0	7.8	11.7	73.5	25.4	79.6
862	C0	GS1_4.04	GS1_4	870.9	16.5	10.5	11.8	14.4	73.8	25.3	80.0
863	C0	GS1_4.05	GS1_4	823.1	14.0	11.0	11.2	14.4	73.4	26.4	79.2
864	C0	GS1_4.06	GS1_4	649.6	15.0	9.5	10.5	13.5	71.9	25.4	77.7
865	C0	GS1_40.01	GS1_40	377.2	13.5	7.5	10.3	16.4	67.2	32.2	77.6
866	C0	GS1_40.02	GS1_40	731.3	15.0	10.0	13.1	15.5	69.6	31.1	78.4
867	C0	GS1_40.03	GS1_40	458.6	13.5	8.5	13.6	18.1	70.0	31.2	79.5
868	C0	GS1_40.05	GS1_40	396.2	12.5	8.0	14.0	21.5	73.6	29.1	79.6
869	C0	GS1_40.06	GS1_40	420.4	14.0	8.5	13.7	17.4	66.7	33.3	78.0
870	C0	GS1_41.01	GS1_41	512.5	13.5	8.5	12.5	16.5	70.7	26.8	78.3
871	C0	GS1_41.01	GS1_41	558.8	12.0	9.5	11.8	15.4	70.4	28.2	80.5
872	C0	GS1_41.02	GS1_41	391.5	12.0	8.5	12.0	15.4	75.1	21.4	78.5
873	C0	GS1_41.02	GS1_41	472.3	14.0	8.5	11.3	16.0	68.2	29.0	78.4
874	C0	GS1_41.03	GS1_41	367.8	11.5	8.5	11.5	15.5	77.6	18.8	74.0
875	C0	GS1_41.03	GS1_41	808.0	15.0	10.5	11.8	15.3	71.6	26.7	77.7
876	C0	GS1_41.05	GS1_41	485.2	12.0	9.0	11.6	15.7	72.5	26.3	81.0
877	C0	GS1_41.05	GS1_41	581.4	15.0	9.5	13.0	15.8	65.9	29.4	76.2
878	C0	GS1_43.02	GS1_43	887.4	18.5	10.0	14.0	17.5	71.1	28.8	79.0
879	C0	GS1_43.02	GS1_43	901.1	18.5	10.0	13.2	16.9	70.7	28.3	76.3
880	C0	GS1_43.03	GS1_43	967.6	18.5	9.5	14.5	19.1	71.5	30.7	76.3
881	C0	GS1_43.03	GS1_43	966.9	16.5	10.0	12.9	14.7	72.6	28.2	74.9
882	C0	GS1_43.04	GS1_43	587.4	14.5	9.0	13.4	14.6	71.3	31.3	74.1
883	C0	GS1_43.04	GS1_43	558.8	13.0	8.5	12.3	17.0	70.6	30.8	79.1
884	C0	GS1_43.05	GS1_43	584.8	15.5	8.5	13.3	15.3	70.3	27.6	72.7
885	C0	GS1_43.06	GS1_43	982.9	18.5	10.5	11.8	14.5	71.6	28.0	77.0
886	C0	GS1_44.01	GS1_44	805.6	17.5	10.5	12.6	14.6	72.4	30.1	81.2
887	C0	GS1_44.02	GS1_44	791.6	17.5	10.0	12.8	15.1	71.4	30.7	77.9
888	C0	GS1_44.03	GS1_44	808.5	17.5	11.0	10.8	13.4	73.7	26.1	74.4
889	C0	GS1_44.04	GS1_44	923.9	18.5	10.5	11.1	11.7	69.0	30.8	78.3
890	C0	GS1_44.05	GS1_44	703.6	17.0	9.5	11.9	14.2	72.6	27.7	79.7
891	C0	GS1_44.06	GS1_44	684.3	17.0	9.5	9.8	18.2	71.8	29.7	77.0
892	C0	GS1_45.01	GS1_45	688.6	18.0	9.5	12.2	18.1	72.6	26.9	78.5
893	C0	GS1_45.02	GS1_45	471.7	15.5	8.0	12.8	20.8	72.1	28.3	76.6
894	C0	GS1_45.03	GS1_45	733.9	19.5	9.5	11.7	16.0	72.5	28.2	76.4
895	C0	GS1_45.04	GS1_45	752.9	16.0	10.5	11.6	14.9	70.6	29.0	76.2
896	C0	GS1_45.05	GS1_45	527.7	17.0	8.5	12.2	20.5	70.8	27.8	79.2
897	C0	GS1_45.06	GS1_45	932.5	20.0	10.5	9.7	12.9	72.4	26.5	76.0
898	C0	GS1_46.01	GS1_46	525.3	16.0	10.0	11.1	14.4	70.2	30.6	80.5
899	C0	GS1_46.02	GS1_46	618.7	15.5	9.5	9.5	11.0	72.0	27.9	75.4
900	C0	GS1_46.03	GS1_46	793.4	16.5	10.0	11.4	13.7	71.8	28.9	80.0
901	C0	GS1_46.04	GS1_46	631.6	16.5	9.5	10.6	15.2	70.5	33.6	77.9
902	C0	GS1_46.05	GS1_46	745.0	16.0	10.0	11.3	14.9	72.2	26.7	77.2
903	C0	GS1_46.06	GS1_46	560.3	15.0	9.0	11.5	14.0	72.0	30.0	80.8
904	C0	GS1_47.01	GS1_47	436.1	12.0	8.5	11.5	14.3	71.6	28.7	80.1
905	C0	GS1_47.02	GS1_47	367.1	12.5	8.0	10.0	13.0	71.4	27.5	80.9
906	C0	GS1_47.03	GS1_47	362.7	12.5	8.0	9.6	16.5	70.9	28.9	79.8
907	C0	GS1_47.04	GS1_47	646.7	15.5	9.0	11.0	14.2	71.6	28.1	78.8
908	C0	GS1_47.05	GS1_47	770.1	15.0	10.0	11.7	13.9	72.8	26.2	77.0
909	C0	GS1_47.06	GS1_47	618.7	15.5	9.0	11.9	14.2	71.5	27.6	81.1
910	C0	GS1_48.01	GS1_48	738.6	16.0	10.5	11.3	16.3	72.9	24.1	75.9
911	C0	GS1_48.02	GS1_48	578.4	16.5	9.5	12.5	20.3	70.3	27.5	78.8
912	C0	GS1_48.03	GS1_48	669.0	17.0	10.0	12.7	16.4	73.8	25.3	73.4
913	C0	GS1_48.04	GS1_48	651.9	16.5	10.5	11.4	15.8	72.6	23.8	74.1
914	C0	GS1_48.05	GS1_48	907.0	19.0	11.5	9.7	12.8	73.8	23.7	72.8
915	C0	GS1_48.06	GS1_48	1183.2	23.0	12.0	9.7	15.3	71.2	25.7	73.7
916	C0	GS1_49.01	GS1_49	525.5	14.0	9.0	10.8	13.9	67.4	26.5	76.1
917	C0	GS1_49.02	GS1_49	738.4	17.0	10.5	11.8	15.0	68.7	27.2	77.7
918	C0	GS1_49.03	GS1_49	951.5	17.5	11.5	11.0	14.2	70.0	29.0	78.3
919	C0	GS1_49.04	GS1_49	802.5	17.5	10.5	11.6	15.6	68.6	28.0	78.3
920	C0	GS1_49.05	GS1_49	751.5	15.0	11.0	12.1	15.4	68.2	26.3	76.0
921	C0	GS1_49.06	GS1_49	731.1	15.5	10.5	11.7	15.7	69.7	25.7	77.7
922	C0	GS1_5.01	GS1_5	1045.5	17.5	11.0	11.4	19.6	73.9	25.0	82.8
923	C0	GS1_5.02	GS1_5	966.4	18.0	10.0	13.3	20.2	69.6	25.9	72.5
924	C0	GS1_5.03	GS1_5	1114.0	20.5	9.5	10.2	14.4	73.8	28.3	78.9
925	C0	GS1_5.04	GS1_5	519.1	15.0	8.5	12.8	15.6	70.5	28.5	73.0
926	C0	GS1_5.05	GS1_5	857.5	18.5	9.5	11.0	15.5	71.0	27.7	76.6
927	C0	GS1_5.06	GS1_5	593.5	16.5	9.0	11.4	14.0	67.8	30.2	76.8
928	C0	GS1_50.01	GS1_50	594.2	16.0	9.0	12.6	14.1	70.1	30.8	77.6
929	C0	GS1_50.02	GS1_50	538.5	15.5	9.0	11.0	12.5	68.8	32.3	78.1
930	C0	GS1_50.03	GS1_50	397.1	14.5	8.0	11.5	14.9	69.9	32.0	79.6
931	C0	GS1_50.04	GS1_50	557.3	16.5	9.0	10.9	15.5	67.3	35.9	76.9
932	C0	GS1_50.05	GS1_50	578.8	16.0	9.0	10.9	12.0	71.1	31.3	78.3
933	C0	GS1_50.06	GS1_50	282.0	12.5	7.5	13.5	19.6	68.9	31.4	78.3
934	C0	GS1_51.01	GS1_51	709.4	17.0	10.0	11.5	15.1	71.7	26.3	79.4
935	C0	GS1_51.02	GS1_51	668.6	15.5	10.0	11.4	17.6	72.6	28.4	80.8
936	C0	GS1_51.03	GS1_51	639.1	17.0	9.0	11.9	17.4	71.9	29.0	83.5
937	C0	GS1_51.04	GS1_51	440.0	14.5	9.0	11.6	16.1	68.8	31.2	77.0
938	C0	GS1_51.05	GS1_51	466.5	15.0	8.5	11.4	17.2	66.9	30.2	75.9
939	C0	GS1_51.06	GS1_51	697.9	16.5	9.5	10.3	16.2	70.7	27.9	82.5
940	C0	GS1_52.01	GS1_52	864.3	15.0	11.0	12.2	16.1	72.5	27.5	73.8
941	C0	GS1_52.02	GS1_52	875.6	16.5	10.5	12.8	15.7	71.2	28.6	78.6
942	C0	GS1_52.03	GS1_52	909.3	17.5	10.5	12.0	18.8	71.3	29.1	80.5
943	C0	GS1_52.04	GS1_52	849.1	16.5	10.5	11.9	15.1	71.2	29.0	76.5
944	C0	GS1_52.05	GS1_52	707.3	17.0	10.5	5.1	6.5	84.5	14.6	52.5
945	C0	GS1_52.06	GS1_52	809.9	17.5	10.5	12.0	15.3	69.0	32.6	79.7
946	C0	GS1_53.01	GS1_53	518.1	15.0	9.0	10.7	16.0	71.8	29.7	81.2
947	C0	GS1_53.02	GS1_53	713.7	17.5	9.0	11.6	14.5	71.0	29.6	78.8
948	C0	GS1_53.03	GS1_53	946.2	16.0	10.0	11.1	13.2	73.7	26.8	77.1
949	C0	GS1_53.04	GS1_53	983.7	19.0	10.0	11.8	16.1	73.3	28.2	79.5
950	C0	GS1_53.05	GS1_53	751.2	18.0	9.5	12.4	16.9	71.2	28.5	80.7
951	C0	GS1_53.06	GS1_53	882.8	17.0	10.0	11.0	17.6	74.7	28.2	79.0
952	C0	GS1_54.01	GS1_54	987.1	17.5	11.0	13.0	17.5	71.9	28.8	81.2
953	C0	GS1_54.02	GS1_54	663.7	16.0	9.0	12.8	15.6	70.3	30.7	79.2
954	C0	GS1_54.03	GS1_54	861.4	17.0	10.5	15.2	22.7	74.3	26.9	83.6
955	C0	GS1_54.04	GS1_54	462.4	14.5	8.5	12.4	14.7	68.4	28.5	74.8
956	C0	GS1_54.05	GS1_54	478.4	15.0	9.0	12.4	15.6	67.9	30.0	77.0
957	C0	GS1_54.06	GS1_54	842.2	17.5	9.0	10.1	14.7	72.5	30.1	76.3
958	C0	GS1_55.01	GS1_55	280.0	11.0	8.0	10.9	14.3	73.6	23.8	69.5
959	C0	GS1_55.02	GS1_55	487.4	14.0	9.5	8.9	11.2	72.0	27.9	73.7
960	C0	GS1_55.03	GS1_55	547.0	16.0	9.5	11.7	15.0	70.9	28.1	76.3
961	C0	GS1_55.04	GS1_55	388.6	14.5	8.5	11.1	13.3	72.1	30.6	76.1
962	C0	GS1_55.05	GS1_55	426.9	13.5	9.0	12.4	16.3	72.4	26.0	73.3
963	C0	GS1_55.06	GS1_55	511.8	16.0	9.0	10.3	13.7	73.2	26.5	73.5
964	C0	GS1_56.01	GS1_56	670.7	14.5	9.5	13.9	16.3	70.3	30.8	78.8
965	C0	GS1_56.02	GS1_56	758.3	14.5	10.5	14.7	16.1	70.5	30.4	79.9
966	C0	GS1_56.03	GS1_56	729.7	13.0	10.5	11.4	14.1	71.7	30.5	78.8
967	C0	GS1_56.04	GS1_56	714.2	15.5	10.0	13.5	16.4	71.5	30.7	75.9
968	C0	GS1_56.05	GS1_56	449.7	13.5	8.5	13.9	20.1	68.3	32.9	77.8
969	C0	GS1_56.06	GS1_56	582.4	13.5	9.5	13.1	19.4	70.1	31.0	80.9
970	C0	GS1_57.01	GS1_57	812.9	18.0	10.0	12.5	15.2	69.2	33.3	79.4
971	C0	GS1_57.02	GS1_57	957.1	19.5	9.5	12.7	17.1	67.8	33.8	78.8
972	C0	GS1_57.03	GS1_57	1018.4	19.0	10.0	8.8	13.4	68.8	33.0	76.9
973	C0	GS1_57.04	GS1_57	749.4	17.0	9.0	14.2	21.1	71.9	30.5	80.3
974	C0	GS1_57.05	GS1_57	813.8	17.5	9.5	12.7	16.2	68.1	34.4	77.9
975	C0	GS1_58.01	GS1_58	647.6	15.0	8.0	14.2	17.6	70.3	31.6	77.1
976	C0	GS1_58.02	GS1_58	662.6	17.0	8.0	13.5	16.0	68.4	33.2	77.5
977	C0	GS1_58.03	GS1_58	606.8	15.5	8.0	14.2	18.8	69.1	32.5	78.1
978	C0	GS1_58.04	GS1_58	597.4	16.0	8.5	13.1	15.8	69.7	30.2	76.3
979	C0	GS1_58.05	GS1_58	528.8	14.0	8.0	13.0	15.6	71.6	30.1	73.8
980	C0	GS1_58.06	GS1_58	630.9	16.5	8.0	12.4	16.5	70.8	31.3	77.7
981	C0	GS1_59.01	GS1_59	707.7	16.0	9.5	11.7	13.0	72.2	31.7	71.5
982	C0	GS1_59.02	GS1_59	375.6	13.0	8.0	13.6	20.2	71.5	31.6	77.6
983	C0	GS1_59.03	GS1_59	704.3	15.5	9.0	11.4	13.9	70.4	32.9	71.0
984	C0	GS1_59.04	GS1_59	539.4	15.5	9.0	11.0	15.0	69.9	34.3	67.8
985	C0	GS1_59.05	GS1_59	729.6	17.0	9.5	10.7	12.3	68.6	34.5	72.2
986	C0	GS1_59.06	GS1_59	511.0	15.0	9.0	9.4	11.5	67.8	32.8	72.3
987	C0	GS1_6.01	GS1_6	755.7	16.5	9.5	11.0	13.4	74.1	24.0	70.7
988	C0	GS1_6.02	GS1_6	850.6	18.0	10.0	10.0	12.7	72.2	26.3	75.7
989	C0	GS1_6.03	GS1_6	790.7	17.0	9.5	11.8	16.5	72.8	26.5	72.3
990	C0	GS1_6.04	GS1_6	769.5	17.5	10.0	10.1	14.4	73.1	25.2	70.7
991	C0	GS1_6.05	GS1_6	822.1	17.5	9.5	11.0	16.3	72.8	27.0	76.5
992	C0	GS1_6.06	GS1_6	678.1	15.5	9.0	12.5	19.7	76.3	22.5	77.0
993	C0	GS1_60.01	GS1_60	761.2	18.5	9.5	12.4	14.0	72.3	29.4	77.0
994	C0	GS1_60.02	GS1_60	909.6	20.0	10.0	13.3	13.8	72.8	27.9	77.0
995	C0	GS1_60.03	GS1_60	934.7	18.5	10.5	9.0	11.2	74.2	27.6	73.3
996	C0	GS1_60.04	GS1_60	874.2	20.0	10.5	11.6	12.3	71.8	29.0	75.1
997	C0	GS1_60.05	GS1_60	634.6	17.5	9.0	12.8	14.8	72.5	29.5	75.7
998	C0	GS1_60.06	GS1_60	769.2	18.5	10.0	11.8	12.1	73.3	26.3	74.1
999	C0	GS1_61.01	GS1_61	1303.0	20.5	10.5	11.1	16.9	71.0	28.6	72.6
1000	C0	GS1_61.02	GS1_61	901.4	18.5	9.5	11.2	15.3	70.9	28.9	72.9
1001	C0	GS1_61.03	GS1_61	1050.4	17.0	11.0	11.8	13.1	70.9	27.6	72.0
1002	C0	GS1_61.04	GS1_61	964.5	16.5	9.5	12.8	15.8	73.3	26.8	69.6
1003	C0	GS1_61.05	GS1_61	987.6	16.5	10.5	11.6	12.6	74.5	24.9	66.8
1004	C0	GS1_61.06	GS1_61	765.9	15.0	10.0	14.2	18.3	72.4	28.7	66.5
1005	C0	GS1_62.01	GS1_62	858.8	18.5	10.0	11.3	12.8	72.8	27.5	76.9
1006	C0	GS1_62.02	GS1_62	840.9	18.0	10.0	9.5	13.8	73.1	28.3	79.1
1007	C0	GS1_62.03	GS1_62	870.6	18.0	9.5	11.2	13.5	72.1	28.7	77.3
1008	C0	GS1_62.04	GS1_62	864.8	17.5	10.5	12.7	17.1	72.1	27.4	78.6
1009	C0	GS1_62.05	GS1_62	725.5	16.0	9.5	11.3	13.3	71.9	30.4	78.3
1010	C0	GS1_62.06	GS1_62	802.2	16.5	10.0	11.7	18.2	74.3	25.8	76.4
1011	C0	GS1_63.01	GS1_63	1158.4	19.0	11.0	10.1	14.3	73.7	27.6	77.0
1012	C0	GS1_63.02	GS1_63	890.9	18.0	10.0	12.6	16.5	71.8	28.1	78.1
1013	C0	GS1_63.03	GS1_63	944.1	17.0	10.5	13.0	17.6	74.1	24.8	73.6
1014	C0	GS1_63.04	GS1_63	927.6	18.0	10.0	11.0	15.5	69.5	27.6	77.1
1015	C0	GS1_63.05	GS1_63	1179.2	18.0	11.0	11.9	15.0	73.0	26.7	76.4
1016	C0	GS1_63.06	GS1_63	1350.1	19.0	11.5	11.3	15.6	74.9	24.3	73.7
1017	C0	GS1_64.01	GS1_64	1304.9	21.0	11.5	11.2	14.6	72.2	29.9	81.3
1018	C0	GS1_64.02	GS1_64	1409.1	20.0	11.0	11.4	13.3	74.0	29.1	77.8
1019	C0	GS1_64.03	GS1_64	932.2	18.0	10.5	12.9	15.9	73.2	25.9	80.9
1020	C0	GS1_64.04	GS1_64	1327.0	19.0	11.0	12.0	16.7	72.9	27.2	76.8
1021	C0	GS1_64.05	GS1_64	1312.0	22.0	11.5	12.5	14.8	71.4	28.4	78.9
1022	C0	GS1_64.06	GS1_64	1092.7	17.5	11.0	8.0	16.6	73.6	29.3	79.3
1023	C0	GS1_65.01	GS1_65	434.5	13.0	8.5	10.9	12.4	73.3	24.9	72.4
1024	C0	GS1_65.02	GS1_65	548.2	17.5	8.0	11.2	13.1	72.2	26.8	70.4
1025	C0	GS1_65.03	GS1_65	768.6	17.0	9.0	10.5	12.0	74.0	25.2	67.6
1026	C0	GS1_65.04	GS1_65	671.6	15.5	9.0	10.2	12.2	74.5	24.6	71.5
1027	C0	GS1_65.05	GS1_65	620.7	16.0	8.5	10.7	11.6	72.2	26.9	74.4
1028	C0	GS1_65.06	GS1_65	623.7	14.5	9.5	10.6	12.1	73.1	22.9	68.3
1029	C0	GS1_66.01	GS1_66	427.4	16.5	7.5	11.4	14.2	68.2	28.9	73.1
1030	C0	GS1_66.02	GS1_66	887.5	20.5	9.5	11.6	13.8	71.5	25.1	72.1
1031	C0	GS1_66.03	GS1_66	996.4	17.5	11.0	14.5	17.2	71.3	28.2	77.9
1032	C0	GS1_66.04	GS1_66	1060.3	21.5	10.0	12.6	15.1	69.9	28.2	73.3
1033	C0	GS1_66.05	GS1_66	802.8	17.0	10.0	12.0	14.9	73.8	25.2	78.6
1034	C0	GS1_66.06	GS1_66	842.3	18.5	9.0	13.1	16.4	71.8	27.4	74.1
1035	C0	GS1_67.01	GS1_67	808.3	14.5	11.0	12.4	14.1	71.3	29.5	79.9
1036	C0	GS1_67.02	GS1_67	644.3	13.5	9.5	13.2	14.6	70.6	31.1	80.7
1037	C0	GS1_67.03	GS1_67	991.9	15.5	11.0	13.0	14.5	69.7	31.0	78.5
1038	C0	GS1_67.04	GS1_67	1157.3	15.0	12.5	12.3	13.9	72.3	28.1	77.7
1039	C0	GS1_67.05	GS1_67	1007.1	14.0	11.5	11.1	14.3	70.9	29.4	78.8
1040	C0	GS1_67.06	GS1_67	880.1	14.0	11.0	11.8	13.6	72.0	28.5	78.1
1041	C0	GS1_68.01	GS1_68	402.0	13.5	8.0	12.1	17.6	68.3	29.9	77.9
1042	C0	GS1_68.02	GS1_68	661.4	17.0	9.0	13.4	16.8	69.8	29.5	79.9
1043	C0	GS1_68.03	GS1_68	685.0	15.5	9.0	12.3	14.3	70.2	28.8	74.5
1044	C0	GS1_68.04	GS1_68	850.7	16.5	9.5	10.6	14.3	69.9	29.4	79.0
1045	C0	GS1_68.05	GS1_68	879.8	18.0	10.0	12.2	15.2	69.0	29.0	77.7
1046	C0	GS1_69.01	GS1_69	782.5	17.5	10.0	13.8	16.8	67.7	33.1	76.7
1047	C0	GS1_69.02	GS1_69	830.5	20.0	9.5	13.9	16.9	69.2	32.7	78.3
1048	C0	GS1_69.03	GS1_69	1320.2	22.5	10.5	13.9	16.7	67.3	33.5	77.8
1049	C0	GS1_69.04	GS1_69	703.0	17.5	9.0	12.6	16.8	67.0	33.5	78.2
1050	C0	GS1_69.05	GS1_69	557.0	17.0	8.5	14.2	17.5	64.5	36.0	75.7
1051	C0	GS1_69.06	GS1_69	809.8	16.0	10.0	14.5	18.2	66.1	34.3	76.4
1052	C0	GS1_7.04	GS1_7	576.0	15.0	9.0	11.4	15.3	70.2	28.3	77.4
1053	C0	GS1_7.05	GS1_7	629.4	15.0	9.0	13.0	21.0	75.0	24.0	83.7
1054	C0	GS1_7.06	GS1_7	778.3	14.5	9.5	13.3	13.9	70.7	30.8	80.4
1055	C0	GS1_70.01	GS1_70	853.3	16.0	10.0	11.2	13.5	73.3	26.0	76.7
1056	C0	GS1_70.02	GS1_70	640.7	16.0	9.5	11.1	14.7	71.6	25.0	75.2
1057	C0	GS1_70.03	GS1_70	1155.3	19.0	10.5	10.1	12.0	74.1	27.2	79.0
1058	C0	GS1_70.04	GS1_70	823.3	15.5	10.0	9.9	14.3	73.3	25.9	74.9
1059	C0	GS1_70.05	GS1_70	785.3	16.5	9.5	11.8	15.1	71.7	26.0	80.3
1060	C0	GS1_70.06	GS1_70	996.2	16.5	11.5	10.3	12.6	71.2	27.7	78.8
1061	C0	GS1_71.01	GS1_71	598.6	17.0	10.0	13.0	15.4	73.5	29.1	76.2
1062	C0	GS1_71.02	GS1_71	632.6	16.0	9.0	13.9	17.1	73.9	29.0	74.6
1063	C0	GS1_71.03	GS1_71	431.2	16.0	8.0	12.7	17.9	70.7	31.1	79.2
1064	C0	GS1_71.04	GS1_71	593.7	17.5	8.5	13.9	17.4	75.1	27.9	72.5
1065	C0	GS1_71.05	GS1_71	489.5	16.0	8.0	14.3	17.2	73.5	28.9	72.9
1066	C0	GS1_71.06	GS1_71	500.9	17.0	8.0	13.6	15.6	72.0	30.3	73.6
1067	C0	GS1_72.01	GS1_72	600.8	17.5	9.0	15.1	20.5	69.9	34.5	74.0
1068	C0	GS1_72.02	GS1_72	397.3	15.0	9.0	13.8	17.0	70.0	33.3	77.0
1069	C0	GS1_72.03	GS1_72	684.8	17.5	9.0	5.6	6.2	68.6	32.0	76.3
1070	C0	GS1_72.04	GS1_72	428.0	14.5	8.5	14.9	18.1	74.9	20.3	61.9
1071	C0	GS1_72.05	GS1_72	641.2	17.5	9.5	9.1	18.7	67.5	34.0	76.1
1072	C0	GS1_72.06	GS1_72	923.2	18.0	10.5	15.2	17.0	68.2	34.2	75.3
1073	C0	GS1_73.01	GS1_73	1045.9	21.0	11.5	11.8	13.4	75.2	24.0	76.0
1074	C0	GS1_73.02	GS1_73	558.7	15.0	8.5	11.4	13.3	76.2	21.3	72.9
1075	C0	GS1_73.03	GS1_73	824.9	19.0	10.5	8.9	10.0	70.8	27.2	78.1
1076	C0	GS1_73.04	GS1_73	979.1	18.5	10.5	11.3	14.2	74.0	27.1	80.7
1077	C0	GS1_73.05	GS1_73	788.5	17.0	10.0	9.2	12.1	73.4	26.7	80.0
1078	C0	GS1_73.06	GS1_73	685.3	16.0	9.5	11.7	13.3	75.9	21.4	74.2
1079	C0	GS1_74.01	GS1_74	934.9	19.5	10.5	10.9	13.4	72.3	29.2	73.2
1080	C0	GS1_74.02	GS1_74	598.4	17.5	9.5	10.0	12.4	70.0	30.8	76.3
1081	C0	GS1_74.03	GS1_74	781.5	17.5	10.5	10.8	13.7	71.4	27.3	71.9
1082	C0	GS1_74.04	GS1_74	809.3	17.0	10.5	10.9	12.4	70.8	30.3	74.3
1083	C0	GS1_74.05	GS1_74	1042.6	20.0	11.0	10.5	10.8	70.8	28.8	71.7
1084	C0	GS1_75.01	GS1_75	404.2	14.5	8.0	11.2	13.8	70.0	30.5	76.4
1085	C0	GS1_75.02	GS1_75	466.0	13.5	9.0	12.9	20.2	71.9	30.5	82.2
1086	C0	GS1_75.03	GS1_75	642.9	15.0	9.5	11.8	15.8	70.1	31.4	81.2
1087	C0	GS1_75.04	GS1_75	695.9	15.5	9.0	11.5	16.5	72.4	30.0	82.4
1088	C0	GS1_75.05	GS1_75	742.0	17.0	10.0	12.1	14.2	71.4	30.9	81.3
1089	C0	GS1_75.06	GS1_75	705.4	16.5	10.0	11.3	14.7	70.8	30.0	78.7
1090	C0	GS1_76.01	GS1_76	770.5	15.5	9.0	10.6	12.7	76.7	24.8	64.4
1091	C0	GS1_76.02	GS1_76	420.7	12.5	8.0	11.0	17.2	73.2	29.3	79.0
1092	C0	GS1_76.03	GS1_76	530.7	13.5	8.5	13.5	14.8	73.7	27.3	68.1
1093	C0	GS1_76.04	GS1_76	606.1	12.5	9.0	12.6	17.9	75.0	26.9	72.0
1094	C0	GS1_76.05	GS1_76	503.9	13.5	8.0	10.9	14.4	73.0	29.7	73.3
1095	C0	GS1_76.06	GS1_76	666.3	15.0	9.0	12.1	14.2	73.3	27.3	68.4
1096	C0	GS1_77.01	GS1_77	1446.5	20.5	11.0	11.2	14.6	72.3	26.3	80.1
1097	C0	GS1_77.02	GS1_77	1192.5	17.5	11.5	12.0	15.4	72.4	27.3	82.2
1098	C0	GS1_77.03	GS1_77	970.6	18.5	10.5	14.2	17.3	71.8	28.0	79.1
1099	C0	GS1_77.04	GS1_77	795.6	17.5	9.0	12.0	15.8	69.6	31.0	80.0
1100	C0	GS1_77.05	GS1_77	1184.7	19.5	10.5	12.3	14.6	72.0	27.6	81.4
1101	C0	GS1_77.06	GS1_77	1037.7	16.5	11.0	11.8	16.4	72.5	26.6	80.3
1102	C0	GS1_78.01	GS1_78	563.4	15.5	9.5	11.4	14.3	68.6	28.8	77.3
1103	C0	GS1_78.02	GS1_78	883.1	18.5	10.5	10.6	13.3	70.2	28.3	75.8
1104	C0	GS1_78.03	GS1_78	545.4	15.0	9.5	12.1	19.2	68.1	31.8	76.9
1105	C0	GS1_78.04	GS1_78	775.1	18.5	9.5	12.2	15.7	68.8	31.0	78.1
1106	C0	GS1_78.05	GS1_78	633.7	17.5	9.5	11.0	13.4	68.6	29.7	76.3
1107	C0	GS1_78.06	GS1_78	973.6	18.0	11.0	11.3	13.5	70.0	28.9	77.4
1108	C0	GS1_79.01	GS1_79	782.9	18.5	10.0	12.8	16.0	72.3	27.5	76.7
1109	C0	GS1_79.02	GS1_79	456.2	16.0	8.5	10.4	12.0	68.1	32.4	77.7
1110	C0	GS1_79.03	GS1_79	233.8	18.0	8.5	14.0	15.3	69.3	32.4	77.4
1111	C0	GS1_79.04	GS1_79	531.9	16.0	9.5	13.6	18.2	71.5	29.1	80.7
1112	C0	GS1_79.05	GS1_79	497.7	17.5	8.5	13.8	14.2	66.8	33.1	75.4
1113	C0	GS1_79.06	GS1_79	726.0	19.0	9.5	12.5	16.3	70.3	30.6	78.8
1114	C0	GS1_8.01	GS1_8	808.7	16.5	10.5	11.4	18.1	73.8	26.9	74.2
1115	C0	GS1_8.01	GS1_8	751.8	16.0	9.0	10.6	14.1	73.6	26.1	71.4
1116	C0	GS1_8.02	GS1_8	1139.6	19.0	10.5	11.7	14.1	75.8	25.3	70.0
1117	C0	GS1_8.02	GS1_8	1333.1	18.5	12.5	10.7	12.3	75.0	25.3	72.1
1118	C0	GS1_8.03	GS1_8	868.9	16.0	11.0	11.2	18.1	75.8	24.4	71.5
1119	C0	GS1_8.04	GS1_8	1245.4	21.0	11.5	9.9	10.6	72.8	27.8	74.5
1120	C0	GS1_8.05	GS1_8	1001.0	19.5	11.0	10.5	13.5	73.1	26.9	74.5
1121	C0	GS1_8.06	GS1_8	1053.1	20.5	11.5	10.5	14.6	74.1	25.5	72.2
1122	C0	GS1_80.01	GS1_80	617.5	17.5	9.0	11.9	16.9	72.3	29.0	78.7
1123	C0	GS1_80.02	GS1_80	884.5	20.0	10.5	9.3	11.3	70.2	29.5	77.1
1124	C0	GS1_80.03	GS1_80	624.8	18.5	9.0	10.9	16.2	73.6	26.8	76.6
1125	C0	GS1_80.04	GS1_80	744.0	16.0	10.0	11.5	16.0	73.6	30.0	76.4
1126	C0	GS1_80.05	GS1_80	408.8	14.0	8.0	10.7	19.3	74.2	25.6	82.3
1127	C0	GS1_80.06	GS1_80	611.9	17.0	8.0	10.7	13.1	73.9	29.0	75.4
1128	C0	GS1_81.01	GS1_81	1007.7	16.5	10.0	11.6	12.6	69.8	28.4	72.8
1129	C0	GS1_81.02	GS1_81	725.7	15.0	9.5	9.8	13.8	70.6	25.9	74.4
1130	C0	GS1_81.03	GS1_81	869.3	16.0	10.5	10.0	13.6	71.1	27.3	76.3
1131	C0	GS1_81.04	GS1_81	804.2	15.5	10.0	11.6	13.8	69.5	29.1	76.3
1132	C0	GS1_81.05	GS1_81	635.0	13.5	9.5	12.1	14.8	68.3	28.1	72.3
1133	C0	GS1_81.06	GS1_81	592.1	13.5	9.5	11.8	15.2	70.7	28.1	75.8
1134	C0	GS1_82.01	GS1_82	627.6	19.0	8.5	12.1	18.0	73.1	24.6	78.2
1135	C0	GS1_82.02	GS1_82	527.6	17.0	8.0	13.1	15.5	72.7	26.6	74.3
1136	C0	GS1_82.03	GS1_82	764.2	19.5	10.0	9.6	13.9	71.1	25.5	76.0
1137	C0	GS1_82.04	GS1_82	470.4	14.0	9.0	11.5	16.3	72.6	23.7	77.6
1138	C0	GS1_82.05	GS1_82	713.1	19.5	8.5	13.1	17.5	74.2	24.1	75.6
1139	C0	GS1_82.06	GS1_82	661.6	17.5	9.5	12.2	18.0	74.1	22.5	76.8
1140	C0	GS1_83.01	GS1_83	555.9	14.5	9.0	12.4	19.0	70.7	29.5	79.0
1141	C0	GS1_83.02	GS1_83	585.0	14.5	9.5	11.7	14.3	71.9	30.1	75.8
1142	C0	GS1_83.03	GS1_83	600.3	15.0	9.5	11.8	14.3	69.1	30.4	75.0
1143	C0	GS1_83.04	GS1_83	243.8	10.5	7.0	12.7	18.9	71.5	29.3	80.1
1144	C0	GS1_83.05	GS1_83	605.1	16.5	9.5	11.8	14.6	69.1	32.2	75.5
1145	C0	GS1_83.06	GS1_83	635.2	15.5	9.0	11.2	13.1	70.6	31.1	76.0
1146	C0	GS1_84.01	GS1_84	949.0	18.5	10.0	9.9	15.2	75.0	21.2	72.2
1147	C0	GS1_84.01	GS1_84	938.9	20.0	9.5	12.2	15.4	72.7	24.4	75.3
1148	C0	GS1_84.02	GS1_84	1005.7	19.0	10.0	13.2	14.4	70.9	24.8	77.4
1149	C0	GS1_84.02	GS1_84	709.1	17.0	9.0	10.3	13.3	72.3	24.1	76.0
1150	C0	GS1_84.03	GS1_84	965.5	18.0	11.0	12.9	15.7	71.9	24.4	72.4
1151	C0	GS1_84.03	GS1_84	748.9	17.5	9.5	13.0	17.1	73.2	25.9	77.7
1152	C0	GS1_84.04	GS1_84	735.2	17.5	9.5	12.3	18.0	73.6	22.3	78.2
1153	C0	GS1_84.04	GS1_84	831.9	18.0	9.5	13.6	19.1	73.8	25.2	77.4
1154	C0	GS1_84.05	GS1_84	777.6	18.0	10.0	12.5	14.8	68.5	24.3	74.6
1155	C0	GS1_84.05	GS1_84	882.9	17.5	9.5	13.4	16.1	72.9	25.6	78.8
1156	C0	GS1_84.06	GS1_84	512.8	16.0	8.5	12.3	19.8	73.9	23.7	79.7
1157	C0	GS1_84.06	GS1_84	1018.2	18.5	10.5	14.0	16.4	73.5	25.8	76.7
1158	C0	GS1_86.01	GS1_86	618.6	14.5	9.0	11.7	17.7	74.5	25.1	77.6
1159	C0	GS1_86.02	GS1_86	715.5	14.0	10.0	11.6	14.2	73.6	25.2	76.8
1160	C0	GS1_86.03	GS1_86	606.0	14.0	8.5	12.1	18.7	72.5	26.1	80.6
1161	C0	GS1_86.04	GS1_86	450.2	14.0	8.5	12.2	18.6	71.7	27.0	80.1
1162	C0	GS1_87.01	GS1_87	592.0	15.5	8.5	11.4	16.0	72.0	28.5	79.0
1163	C0	GS1_87.02	GS1_87	625.3	16.5	9.0	11.9	18.5	73.2	29.7	80.0
1164	C0	GS1_87.03	GS1_87	721.3	18.0	8.5	10.6	16.6	72.1	31.9	75.4
1165	C0	GS1_87.04	GS1_87	688.1	15.5	9.0	12.4	16.2	73.6	27.9	79.4
1166	C0	GS1_87.05	GS1_87	480.2	14.0	8.0	13.3	15.7	73.0	30.0	80.1
1167	C0	GS1_87.06	GS1_87	802.1	18.0	9.5	11.8	14.9	72.5	30.5	79.9
1168	C0	GS1_88.01	GS1_88	655.0	15.5	10.0	10.7	14.1	69.8	29.2	80.6
1169	C0	GS1_88.02	GS1_88	741.3	15.5	10.5	10.1	12.7	70.5	28.0	79.5
1170	C0	GS1_88.03	GS1_88	688.5	17.5	9.5	11.0	13.9	68.9	31.0	79.3
1171	C0	GS1_88.04	GS1_88	548.7	15.5	9.5	11.5	13.9	66.6	30.2	76.2
1172	C0	GS1_88.05	GS1_88	532.2	16.5	8.5	11.1	13.8	70.3	29.1	78.6
1173	C0	GS1_88.06	GS1_88	773.8	16.0	10.0	10.7	14.3	69.5	29.7	78.2
1174	C0	GS1_89.01	GS1_89	745.8	14.5	9.5	14.0	20.7	69.0	30.5	73.4
1175	C0	GS1_89.02	GS1_89	784.9	15.0	9.5	13.6	15.7	73.2	28.7	72.7
1176	C0	GS1_89.03	GS1_89	714.9	15.0	9.5	13.3	16.4	71.5	29.8	75.0
1177	C0	GS1_89.04	GS1_89	699.4	15.0	8.5	13.0	16.6	71.4	28.8	74.8
1178	C0	GS1_89.05	GS1_89	826.9	15.0	9.5	13.4	16.7	70.3	30.4	78.3
1179	C0	GS1_89.06	GS1_89	785.0	17.0	8.5	13.0	18.6	73.4	27.3	70.6
1180	C0	GS1_9.01	GS1_9	585.1	15.0	9.0	15.0	19.1	65.6	37.4	76.3
1181	C0	GS1_9.02	GS1_9	659.5	16.0	9.0	14.5	17.9	68.1	35.2	78.7
1182	C0	GS1_9.03	GS1_9	368.2	14.0	8.0	14.2	18.7	68.9	33.6	79.9
1183	C0	GS1_9.04	GS1_9	782.2	15.5	10.0	12.3	15.3	69.8	31.5	75.9
1184	C0	GS1_9.05	GS1_9	408.1	15.0	8.0	14.0	18.3	66.8	35.4	77.6
1185	C0	GS1_9.06	GS1_9	494.8	12.0	9.0	13.0	17.2	70.2	29.5	78.2
1186	C0	GS1_90.01	GS1_90	1018.2	14.5	11.0	12.0	16.6	69.3	27.1	75.4
1187	C0	GS1_90.02	GS1_90	845.4	15.0	10.0	13.3	15.5	68.7	26.3	75.4
1188	C0	GS1_90.03	GS1_90	905.8	15.5	10.0	11.9	14.0	66.9	27.8	73.4
1189	C0	GS1_90.04	GS1_90	1365.1	17.5	11.0	12.1	14.6	68.8	26.3	72.5
1190	C0	GS1_90.05	GS1_90	889.3	15.0	10.0	10.8	14.5	69.9	26.5	75.3
1191	C0	GS1_90.06	GS1_90	998.1	15.0	10.5	13.3	13.2	68.2	28.6	75.5
1192	C0	GS1_91.01	GS1_91	322.3	12.5	8.0	13.7	16.1	67.9	33.0	79.3
1193	C0	GS1_91.02	GS1_91	570.7	14.0	9.0	12.3	15.7	71.8	28.3	77.5
1194	C0	GS1_91.03	GS1_91	412.5	14.5	8.0	13.6	16.4	70.8	29.4	77.1
1195	C0	GS1_91.04	GS1_91	582.5	14.0	9.0	12.4	15.8	70.9	30.5	79.6
1196	C0	GS1_91.05	GS1_91	433.9	12.5	8.5	13.8	16.9	72.5	28.7	77.5
1197	C0	GS1_91.06	GS1_91	502.7	14.5	8.5	13.9	16.7	70.4	31.9	77.6
1198	C0	GS1_92.01	GS1_92	874.3	15.5	9.5	12.7	15.5	73.5	26.7	74.1
1199	C0	GS1_92.02	GS1_92	828.0	15.0	9.5	13.0	16.4	72.5	26.8	77.4
1200	C0	GS1_92.03	GS1_92	615.5	14.5	9.0	13.0	17.7	71.9	27.8	75.4
1201	C0	GS1_92.04	GS1_92	770.9	14.5	10.0	12.8	15.5	73.0	26.8	76.6
1202	C0	GS1_92.05	GS1_92	741.9	16.0	9.0	13.8	17.5	72.8	26.9	77.4
1203	C0	GS1_92.06	GS1_92	834.4	16.0		11.8	14.7	74.2	27.1	78.7
1204	C0	GS1_93.01	GS1_93	1034.9	19.5	10.0	13.8	16.8	71.8	29.9	76.2
1205	C0	GS1_93.02	GS1_93	1076.7	18.5	11.0	13.2	16.1	71.0	27.6	73.9
1206	C0	GS1_93.03	GS1_93	703.2	17.0	10.5	13.3	17.1	70.2	29.4	76.8
1207	C0	GS1_93.04	GS1_93	940.0	18.5	12.0	11.3	13.6	77.4	25.5	68.2
1208	C0	GS1_93.05	GS1_93	714.3	17.0	10.0	12.6	15.6	71.3	28.8	75.3
1209	C0	GS1_93.06	GS1_93	1232.2	20.0	11.0	13.1	17.0	72.4	27.9	75.5
1210	C0	GS1_94.01	GS1_94	1319.0	17.0	12.0	12.7	14.5	70.8	28.4	75.1
1211	C0	GS1_94.02	GS1_94	897.4	15.0	11.0	12.2	14.2	71.7	28.0	71.2
1212	C0	GS1_94.03	GS1_94	932.4	15.5	10.5	11.5	15.4	71.6	28.5	74.9
1213	C0	GS1_94.04	GS1_94	1322.4	20.5	12.5	12.3	14.9	71.1	28.7	78.3
1214	C0	GS1_94.05	GS1_94	811.5	15.5	10.0	12.6	14.8	69.4	29.5	73.5
1215	C0	GS1_94.06	GS1_94	851.5	14.0	10.0	11.5	15.5	69.4	30.2	76.0
1216	C0	GS1_95.02	GS1_95	612.9	17.5	9.5	10.5	13.4	68.8	30.6	77.9
1217	C0	GS1_95.04	GS1_95	675.0	18.0	10.0	10.5	13.9	71.8	27.5	76.8
1218	C0	GS1_95.05	GS1_95	596.0	18.5	9.0	11.6	13.7	68.3	29.1	74.2
1219	C0	GS1_95.06	GS1_95	408.0	15.5	8.5	11.7	13.5	67.4	28.5	76.0
1220	C0	GS1_96.01	GS1_96	925.3	20.5	10.0	11.6	15.1	70.5	32.0	80.7
1221	C0	GS1_96.02	GS1_96	845.9	20.0	10.5	11.8	16.2	71.2	28.5	79.5
1222	C0	GS1_96.03	GS1_96	675.4	19.0	10.5	13.6	16.8	69.1	32.0	77.2
1223	C0	GS1_96.04	GS1_96	666.5	19.0	10.0	12.8	16.4	70.8	28.7	78.0
1224	C0	GS1_96.05	GS1_96	869.9	19.0	10.5	12.9	19.1	74.2	27.0	76.2
1225	C0	GS1_96.06	GS1_96	749.7	20.5	9.5	12.7	17.9	70.0	30.2	76.5
1226	C0	GS1_97.01	GS1_97	1313.0	18.0	11.0	13.8	15.9	72.1	29.6	76.1
1227	C0	GS1_97.02	GS1_97	433.9	13.0	7.5	13.6	17.0	67.7	32.1	74.7
1228	C0	GS1_97.03	GS1_97	806.8	15.5	9.0	13.6	17.8	70.7	30.7	78.7
1229	C0	GS1_97.04	GS1_97	981.0	17.0	10.5	12.1	15.0	73.5	28.0	78.5
1230	C0	GS1_97.05	GS1_97	986.5	17.5	9.5	13.2	16.4	71.6	28.1	80.0
1231	C0	GS1_97.06	GS1_97	893.3	17.5	9.5	14.2	17.7	71.0	30.4	75.2
1232	C0	GS1_98.01	GS1_98	824.9	15.5	10.0	14.1	17.5	69.1	31.8	78.4
1233	C0	GS1_98.02	GS1_98	883.2	16.0	10.0	12.7	14.5	70.6	29.1	77.3
1234	C0	GS1_98.03	GS1_98	1000.4	16.0	10.5	12.4	15.6	70.0	30.4	79.1
1235	C0	GS1_98.04	GS1_98	645.8	13.5	9.0	11.9	16.5	71.8	27.2	74.1
1236	C0	GS1_98.05	GS1_98	737.0	14.0	9.5	10.1	14.8	70.6	30.0	78.1
1237	C0	GS1_98.06	GS1_98	751.0	14.5	9.0	13.8	16.6	72.1	28.0	74.9
1238	C0	GS1_99.01	GS1_99	770.7	15.5	10.5	12.8	17.8	74.5	24.5	75.4
1239	C0	GS1_99.02	GS1_99	926.5	15.0	11.0	12.3	14.9	73.2	26.7	75.5
1240	C0	GS1_99.03	GS1_99	844.2	16.0	10.0	11.5	15.6	73.1	27.7	73.8
1241	C0	GS1_99.04	GS1_99	879.3	16.5	10.5	12.0	15.7	74.1	27.8	77.0
1242	C0	GS1_99.05	GS1_99	690.3	12.5	10.0	9.3	15.3	74.0	26.1	76.1
1243	C0	GS1_99.06	GS1_99	671.7	13.5	9.5	10.6	14.5	75.2	25.9	74.3
1244	C2	GS3.1_9.01	GS3.1_9	1046.8	16.0	10.5	10.5	14.0	64.9	26.3	71.4
1245	C2	GS3.1_9.02	GS3.1_9	940.6	15.5	10.0	10.3	14.7	63.8	24.0	69.9
1246	C2	GS3.1_9.03	GS3.1_9	849.0	14.5	9.5	11.3	15.0	64.7	24.7	68.4
1247	C2	GS3.1_9.04	GS3.1_9	818.3	15.5	9.5	10.7	15.6	63.6	21.3	68.4
1248	C2	GS3.1_174.01	GS3.1_174	727.0	17.0	9.5	11.0	16.2	63.1	23.4	73.3
1249	C2	GS3.1_174.02	GS3.1_174	849.4	18.0	10.5	10.8	12.2	63.4	23.3	71.5
1250	C2	GS3.1_174.03	GS3.1_174	874.9	17.0	10.0	10.0	14.8	63.2	24.6	72.2
1251	C2	GS3.1_174.04	GS3.1_174	595.6	17.0	9.5	11.1	15.5	62.3	24.9	72.7
1252	C2	GS3.1_174.05	GS3.1_174	726.3	17.0	9.0	10.5	14.2	63.4	24.2	74.1
1253	C2	GS3.1_41.01	GS3.1_41	870.6	15.0	10.5	9.7	11.4	66.0	23.5	66.8
1254	C2	GS3.1_41.02	GS3.1_41	982.7	16.5	11.0	8.6	10.5	65.7	23.7	70.3
1255	C2	GS3.1_41.03	GS3.1_41	1094.3	17.5	11.0	9.4	11.1	67.5	23.4	68.1
1256	C2	GS3.1_41.04	GS3.1_41	835.4	14.5	10.5	9.1	10.8	67.2	22.4	66.6
1257	C2	GS3.1_120.01	GS3.1_120	840.9	17.5	9.5	13.3	15.9	65.1	21.1	62.8
1258	C2	GS3.1_120.02	GS3.1_120	936.8	18.5	10.0	11.4	16.2	66.5	20.8	69.0
1259	C2	GS3.1_120.03	GS3.1_120	1039.6	19.0	11.0	11.7	15.8	63.8	24.5	71.4
1260	C2	GS3.1_120.04	GS3.1_120	627.3	15.0	9.0	12.4	15.3	65.7	22.9	70.2
1261	C2	GS3.1_120.05	GS3.1_120	865.5	16.5	9.5	11.3	18.7	67.4	23.8	74.2
1262	C2	GS3.1_120.06	GS3.1_120	1028.5	20.5	10.5	8.7	16.0	63.0	23.8	71.5
1263	C2	GS3.1_65.01	GS3.1_65	585.6	15.0	9.0	7.3	10.3	70.5	18.8	64.4
1264	C2	GS3.1_65.02	GS3.1_65	574.4	16.0	8.5	10.0	14.2	68.7	17.8	65.4
1265	C2	GS3.1_65.03	GS3.1_65	513.9	14.0	8.0	10.5	15.6	69.6	18.6	68.1
1266	C2	GS3.1_65.04	GS3.1_65	713.7	16.0	9.0	9.2	12.1	70.2	16.3	64.2
1267	C2	GS3.1_65.05	GS3.1_65	548.5	15.0	9.0	10.0	15.4	68.5	17.0	66.8
1268	C2	GS3.1_65.06	GS3.1_65	568.8	14.0	8.5	12.3	15.6	68.4	20.3	67.8
1269	C2	GS3.1_122.01	GS3.1_122	653.8	13.5	9.0	12.1	14.4	66.8	24.1	72.8
1270	C2	GS3.1_122.02	GS3.1_122	781.6	14.0	10.0	10.5	13.0	65.7	24.2	73.8
1271	C2	GS3.1_122.03	GS3.1_122	603.9	13.5	9.0	11.2	12.8	66.4	21.0	69.3
1272	C2	GS3.1_122.04	GS3.1_122	764.3	12.0	10.0	11.6	15.9	66.9	21.1	70.5
1273	C2	GS3.1_122.05	GS3.1_122	855.8	14.0	10.0	11.0	16.1	66.5	24.3	74.2
1274	C2	GS3.1_122.06	GS3.1_122	803.3	15.5	9.5	10.3	14.8	64.8	21.7	68.8
1275	C2	GS3.1_4.01	GS3.1_4	732.4	15.5	8.5	11.7	15.0	63.9	27.0	74.6
1276	C2	GS3.1_4.02	GS3.1_4	704.7	15.0	9.5	12.0	13.3	62.2	26.5	73.9
1277	C2	GS3.1_4.03	GS3.1_4	849.2	15.5	9.5	12.9	15.6	66.5	25.2	72.2
1278	C2	GS3.1_4.04	GS3.1_4	879.1	15.5	9.5	11.4	13.4	65.0	24.7	73.2
1279	C2	GS3.1_4.05	GS3.1_4	726.7	15.0	9.0	11.2	14.0	63.0	25.2	74.2
1280	C2	GS3.1_4.06	GS3.1_4	883.9	16.0	10.0	10.6	13.6	64.1	25.2	73.6
1281	C2	GS3.1_136.01	GS3.1_136	849.4	15.0	10.5	10.2	12.1	67.8	23.6	67.2
1282	C2	GS3.1_136.02	GS3.1_136	900.4	14.0	10.5	10.6	12.8	68.9	22.6	70.0
1283	C2	GS3.1_136.03	GS3.1_136	942.9	14.0	10.5	10.3	10.9	70.4	21.7	62.6
1284	C2	GS3.1_136.04	GS3.1_136	682.1	13.5	10.0	12.1	14.0	68.3	22.7	63.9
1285	C2	GS3.1_136.05	GS3.1_136	853.1	14.5	9.5	10.8	12.7	67.5	22.3	67.9
1286	C2	GS3.1_136.06	GS3.1_136	688.6	13.0	10.0	10.3	11.8	68.2	21.9	61.2
1287	C2	GS3.1_42.01	GS3.1_42	850.9	14.0	10.5	11.0	14.5	68.3	21.2	67.0
1288	C2	GS3.1_42.02	GS3.1_42	1097.1	15.5	11.0	10.4	13.6	67.0	21.9	71.6
1289	C2	GS3.1_42.03	GS3.1_42	1250.4	15.5	11.0	11.4	12.4	65.5	22.8	71.2
1290	C2	GS3.1_42.04	GS3.1_42	1213.1	15.5	11.0	12.1	14.5	65.5	24.0	70.3
1291	C2	GS3.1_42.05	GS3.1_42	926.7	15.0	10.5	10.1	12.8	67.4	21.9	74.5
1292	C2	GS3.1_42.06	GS3.1_42	743.5	13.0	10.5	10.2	13.2	68.4	18.4	67.3
1293	C2	GS3.1_139.01	GS3.1_139	471.7	13.5	9.0	10.8	12.1	67.3	20.3	70.1
1294	C2	GS3.1_139.02	GS3.1_139	752.8	17.0	9.5	11.1	12.7	67.5	20.6	70.2
1295	C2	GS3.1_139.03	GS3.1_139	665.6	15.0	8.5	10.9	12.7	68.1	20.2	67.5
1296	C2	GS3.1_139.04	GS3.1_139	814.8	18.5	10.0	11.1	11.9	69.4	20.5	69.2
1297	C2	GS3.1_139.05	GS3.1_139	607.7	15.0	9.0	11.6	12.8	66.1	21.6	70.9
1298	C2	GS3.1_182.01	GS3.1_182	827.3	16.5	10.0	9.9	14.4	67.8	23.0	74.6
1299	C2	GS3.1_182.02	GS3.1_182	1111.2	16.5	11.5	7.6	14.6	66.2	23.1	72.5
1300	C2	GS3.1_182.03	GS3.1_182	896.7	15.5	11.0	10.9	16.1	67.1	20.6	73.1
1301	C2	GS3.1_182.04	GS3.1_182	927.0	16.0	10.5	12.4	18.9	67.3	23.9	74.8
1302	C2	GS3.1_182.05	GS3.1_182	835.1	16.5	10.5	8.3	12.4	65.3	21.0	71.8
1303	C2	GS3.1_182.06	GS3.1_182	883.6	16.0	10.5	9.7	13.8	67.4	21.8	72.9
1304	C2	GS3.1_63.01	GS3.1_63	1085.6	19.5	10.5	11.2	15.2	66.2	22.1	70.9
1305	C2	GS3.1_63.02	GS3.1_63	1005.0	19.0	10.5	10.8	14.5	67.2	24.2	73.3
1306	C2	GS3.1_63.03	GS3.1_63	1012.6	18.5	11.0	10.1	17.5	68.8	22.0	76.4
1307	C2	GS3.1_63.04	GS3.1_63	1160.7	18.5	11.0	10.4	17.0	71.1	19.2	72.1
1308	C2	GS3.1_63.05	GS3.1_63	556.3	16.5	9.5	11.5	19.2	70.2	22.0	72.9
1309	C2	GS3.1_63.06	GS3.1_63	981.6	20.5	10.0	10.4	15.7	67.4	23.4	75.8
1310	C2	GS3.1_47.01	GS3.1_47	900.1	16.0	9.5	9.4	11.0	69.0	18.6	61.1
1311	C2	GS3.1_47.02	GS3.1_47	733.7	16.0	10.0	8.8	10.9	68.0	18.8	60.1
1312	C2	GS3.1_47.03	GS3.1_47	819.2	16.0	9.5	9.7	11.2	68.3	17.6	60.3
1313	C2	GS3.1_6.01	GS3.1_6	772.4	17.5	9.0	10.4	11.2	65.8	23.4	68.0
1314	C2	GS3.1_6.02	GS3.1_6	877.0	18.0	10.0	9.9	11.9	65.2	22.7	68.5
1315	C2	GS3.1_6.03	GS3.1_6	1035.0	20.0	10.5	10.5	12.5	64.2	24.5	70.3
1316	C2	GS3.1_6.04	GS3.1_6	1294.6	19.0	11.0	8.7	9.9	66.4	22.2	65.9
1317	C2	GS3.1_6.05	GS3.1_6	1167.3	18.5	10.5	10.3	11.4	64.5	24.0	71.0
1318	C2	GS3.1_6.06	GS3.1_6	724.4	15.0	9.5	9.5	12.0	66.0	23.7	67.9
1319	C2	GS3.1_148.01	GS3.1_148	471.2	16.0	8.5	7.0	7.3	71.4	17.2	52.6
1320	C2	GS3.1_148.02	GS3.1_148	565.3	15.0	9.5	8.5	8.7	67.1	20.6	66.6
1321	C2	GS3.1_148.03	GS3.1_148	441.4	14.5	8.0	7.2	8.3	67.1	21.9	62.4
1322	C2	GS3.1_148.04	GS3.1_148	577.4	17.0	9.0	6.4	7.1	70.7	17.4	56.1
1323	C2	GS3.1_148.05	GS3.1_148	747.5	16.5	9.5	6.7	7.8	70.3	17.8	62.3
1324	C2	GS3.1_148.06	GS3.1_148	391.4	13.5	8.0	6.7	7.1	70.8	18.1	55.3
1325	C2	GS3.1_99.01	GS3.1_99	813.1	13.5	10.5	11.0	13.1	66.8	23.2	77.1
1326	C2	GS3.1_99.02	GS3.1_99	964.8	14.5	10.0	12.7	15.5	66.3	23.5	75.2
1327	C2	GS3.1_99.03	GS3.1_99	828.1	12.5	10.5	9.7	12.9	68.2	22.9	76.1
1328	C2	GS3.1_99.04	GS3.1_99	933.6	13.5	10.5	10.5	12.8	67.3	22.0	75.3
1329	C2	GS3.1_134.01	GS3.1_134	820.1	15.5	9.0	10.5	12.8	65.7	21.7	75.2
1330	C2	GS3.1_134.02	GS3.1_134	976.3	15.5	10.5	10.6	12.3	67.5	21.3	72.0
1331	C2	GS3.1_134.03	GS3.1_134	1222.8	18.0	11.0	10.9	14.3	66.0	19.8	73.5
1332	C2	GS3.1_134.04	GS3.1_134	787.5	16.0	10.0	11.5	15.0	65.9	21.1	71.8
1333	C2	GS3.1_39.01	GS3.1_39	769.3	14.0	10.5	9.6	10.6	67.3	22.0	68.0
1334	C2	GS3.1_39.02	GS3.1_39	849.3	16.0	10.0	8.8	8.5	68.7	21.8	65.9
1335	C2	GS3.1_39.03	GS3.1_39	623.0	17.0	9.0	10.1	11.1	64.7	24.0	71.4
1336	C2	GS3.1_39.04	GS3.1_39	535.9	13.5	8.0	11.7	12.5	63.0	27.1	72.5
1337	C2	GS3.1_38.01	GS3.1_38	1444.9	17.5	11.5	12.3	14.8	67.7	24.4	74.0
1338	C2	GS3.1_38.02	GS3.1_38	870.1	15.5	10.0	12.4	14.1	67.6	22.1	74.3
1339	C2	GS3.1_38.03	GS3.1_38	825.6	14.0	10.5	12.1	14.3	69.8	21.1	73.5
1340	C2	GS3.1_38.04	GS3.1_38	608.7	12.5	9.5	12.4	15.7	69.7	20.3	73.9
1341	C2	GS3.1_43.03	GS3.1_43	653.2	15.5	9.0	9.5	10.5	66.1	22.8	69.9
1342	C2	GS3.1_43.02	GS3.1_43	976.3	19.0	10.0	9.8	10.2	66.6	23.7	68.5
1343	C2	GS3.1_43.01	GS3.1_43	978.8	18.5	9.5	10.7	11.2	66.4	23.4	66.3
1344	C2	GS3.1_127.01	GS3.1_127	900.5	18.0	10.5	11.9	15.4	65.3	25.3	69.7
1345	C2	GS3.1_127.02	GS3.1_127	850.3	16.5	10.5	11.5	13.6	67.0	22.5	67.6
1346	C2	GS3.1_127.03	GS3.1_127	1186.2	18.0	11.5	11.1	13.4	69.6	23.0	69.7
1347	C2	GS3.1_112.01	GS3.1_112	750.3	15.0	9.5	9.9	14.2	67.9	21.4	71.8
1348	C2	GS3.1_112.02	GS3.1_112	808.0	14.5	9.5	11.6	12.5	69.1	20.8	64.9
1349	C2	GS3.1_112.03	GS3.1_112	707.2	14.5	10.0	9.4	13.1	68.4	17.6	65.5
1350	C2	GS3.1_112.04	GS3.1_112	723.7	14.0	9.0	11.7	14.7	68.5	19.9	66.8
1351	C2	GS3.1_112.05	GS3.1_112	514.3	15.0	8.5	11.9	14.9	65.6	23.6	71.6
1352	C2	GS3.1_112.06	GS3.1_112	768.9	15.0	9.0	11.0	12.3	67.9	21.5	67.7
1353	C2	GS3.1_90.01	GS3.1_90	672.8	15.0	10.0	10.1	14.0	67.2	20.3	65.3
1354	C2	GS3.1_90.02	GS3.1_90	585.2	15.5	9.0	9.2	13.5	69.3	21.4	65.3
1355	C2	GS3.1_36.01	GS3.1_36	632.9	14.5	9.5	12.1	17.9	62.5	24.5	71.0
1356	C2	GS3.1_36.02	GS3.1_36	800.4	14.5	10.5	12.0	16.5	63.4	22.0	69.5
1357	C2	GS3.1_36.03	GS3.1_36	795.5	14.5	9.5	11.4	14.1	63.8	25.6	68.8
1358	C2	GS3.1_36.04	GS3.1_36	691.4	14.5	9.0	12.7	16.9	63.9	25.7	72.6
1359	C2	GS3.1_36.05	GS3.1_36	798.9	14.5	9.5	11.9	14.2	61.8	24.5	69.5
1360	C2	GS3.1_36.06	GS3.1_36	897.0	15.0	11.0	11.6	15.6	65.3	24.5	72.0
1361	C2	GS3.1_1.01	GS3.1_1	962.3	21.0	10.0	9.7	10.7	64.0	24.3	72.4
1362	C2	GS3.1_1.02	GS3.1_1	621.9	19.0	9.0	10.8	14.3	66.0	24.7	73.1
1363	C2	GS3.1_1.03	GS3.1_1	719.0	16.5	9.0	9.2	11.6	65.5	23.7	72.4
1364	C2	GS3.1_1.04	GS3.1_1	928.2	19.0	10.0	9.7	12.0	66.2	22.6	69.3
1365	C2	GS3.1_3.01	GS3.1_3	983.9	15.5	11.0	9.7	14.0	68.1	20.8	70.8
1366	C2	GS3.1_3.02	GS3.1_3	739.8	14.5	10.0	8.4	11.4	70.1	19.4	66.4
1367	C2	GS3.1_3.03	GS3.1_3	826.6	15.5	10.5	10.2	12.3	68.7	18.3	65.4
1368	C2	GS3.1_3.04	GS3.1_3	554.2	13.5	8.5	10.1	12.4	66.9	20.6	70.5
1369	C2	GS3.1_3.05	GS3.1_3	857.3	16.0	10.0	9.5	10.5	68.0	19.6	68.4
1370	C2	GS3.1_3.06	GS3.1_3	735.9	16.5	9.5	10.0	11.6	69.5	18.6	63.3
1371	C2	GS3.1_113.01	GS3.1_113	970.9	16.5	11.0	10.7	14.1	65.7	22.9	70.3
1372	C2	GS3.1_113.02	GS3.1_113	1100.1	16.0	11.5	10.9	15.8	68.9	22.3	73.5
1373	C2	GS3.1_113.03	GS3.1_113	707.5	16.0	9.5	11.7	12.5	67.0	23.5	70.8
1374	C2	GS3.1_113.04	GS3.1_113	728.0	15.0	10.0	11.5	16.6	70.5	20.5	68.2
1375	C2	GS3.1_113.05	GS3.1_113	624.9	14.5	9.0	10.9	14.9	66.8	22.9	68.7
1376	C2	GS3.1_113.06	GS3.1_113	576.0	14.0	9.5	11.4	14.9	69.0	21.5	66.4
1377	C2	GS3.1_95.01	GS3.1_95	678.6	15.5	9.0	10.6	12.5	70.2	18.7	66.4
1378	C2	GS3.1_95.02	GS3.1_95	1088.6	17.5	11.0	10.6	11.7	69.2	18.0	65.5
1379	C2	GS3.1_145.01	GS3.1_145	975.1	15.5	10.5	8.8	9.1	70.3	20.2	63.3
1380	C2	GS3.1_145.02	GS3.1_145	566.0	13.0	9.0	10.9	13.8	67.3	21.5	68.9
1381	C2	GS3.1_145.03	GS3.1_145	611.8	15.0	9.0	8.4	10.6	67.4	22.2	69.7
1382	C2	GS3.1_145.04	GS3.1_145	704.1	16.0	9.5	11.5	15.3	65.8	22.2	72.5
1383	C2	GS3.1_145.05	GS3.1_145	422.9	12.5	8.5	10.2	12.3	67.3	20.3	69.7
1384	C2	GS3.1_145.06	GS3.1_145	681.6	14.5	10.0	10.0	10.3	66.2	21.7	65.8
1385	C2	GS3.1_88.01	GS3.1_88	861.7	16.0	11.0	11.7	15.8	64.3	23.0	73.9
1386	C2	GS3.1_88.02	GS3.1_88	1275.7	16.5	11.5	10.9	14.6	66.7	22.5	73.7
1387	C2	GS3.1_88.03	GS3.1_88	623.0	14.0	9.5	11.3	15.3	60.8	21.8	69.7
1388	C2	GS3.1_88.04	GS3.1_88	839.0	14.5	10.5	11.5	14.7	64.5	23.4	69.7
1389	C2	GS3.1_88.05	GS3.1_88	709.3	14.5	9.5	11.8	15.8	65.7	21.3	71.2
1390	C2	GS3.1_88.06	GS3.1_88	889.5	15.0	11.0	11.0	16.5	65.5	23.3	73.5
1391	C2	GS3.1_37.01	GS3.1_37	1379.2	18.0	12.0	9.8	11.3	66.3	23.7	71.5
1392	C2	GS3.1_37.02	GS3.1_37	1229.2	18.5	12.0	9.9	12.1	66.9	22.7	73.4
1393	C2	GS3.1_37.03	GS3.1_37	1276.2	18.0	12.0	10.2	13.1	67.2	22.0	74.4
1394	C2	GS3.1_94.01	GS3.1_94	734.2	16.5	10.0	10.9	12.0	69.9	21.2	63.0
1395	C2	GS3.1_94.02	GS3.1_94	606.7	15.0	9.0	9.8	10.5	69.5	21.8	62.3
1396	C2	GS3.1_94.03	GS3.1_94	434.7	14.0	8.5	10.3	11.7	65.5	24.4	68.2
1397	C2	GS3.1_45.01	GS3.1_45	1112.8	17.5	10.5	12.9	16.5	69.1	24.0	71.0
1398	C2	GS3.1_45.02	GS3.1_45	1061.1	16.0	11.0	11.7	13.8	64.4	26.5	74.3
1399	C2	GS3.1_45.03	GS3.1_45	897.0	15.5	10.0	13.7	15.6	68.2	24.5	68.6
1400	C2	GS3.1_45.04	GS3.1_45	885.9	15.5	9.5	12.1	17.0	67.8	22.5	69.6
1401	C2	GS3.1_45.05	GS3.1_45	936.6	16.0	9.5	12.5	15.6	67.1	22.3	65.1
1402	C2	GS3.1_149.01	GS3.1_149	894.5	18.5	10.0	12.5	17.6	66.1	24.9	72.1
1403	C2	GS3.1_149.02	GS3.1_149	584.9	18.5	9.0	13.1	15.3	61.7	28.3	73.7
1404	C2	GS3.1_149.03	GS3.1_149	929.2	19.0	10.5	12.0	16.5	65.9	27.0	74.0
1405	C2	GS3.1_149.04	GS3.1_149	912.2	19.0	9.5	11.2	16.6	65.7	24.7	76.0
1406	C2	GS3.1_149.05	GS3.1_149	737.6	18.0	9.0	12.0	17.1	65.1	26.4	75.2
1407	C2	GS3.1_149.06	GS3.1_149	1020.8	19.5	10.5	12.0	15.6	65.1	26.0	74.1
1408	C2	GS3.1_54.01	GS3.1_54	737.7	12.5	10.0	11.1	15.0	68.9	19.9	73.4
1409	C2	GS3.1_54.02	GS3.1_54	574.6	13.0	9.0	12.3	13.6	67.1	21.3	73.0
1410	C2	GS3.1_54.03	GS3.1_54	589.9	12.0	10.0	11.0	11.3	67.4	20.6	67.7
1411	C2	GS3.1_54.05	GS3.1_54	637.2	14.0	7.5	11.7	12.8	67.5	20.1	67.2
1412	C2	GS3.1_54.06	GS3.1_54	645.0	12.5	9.0	10.9	14.9	67.9	21.1	75.8
1413	C2	GS3.1_13.01	GS3.1_13	750.8	14.5	9.5	10.8	12.7	65.3	23.9	69.3
1414	C2	GS3.1_13.02	GS3.1_13	980.7	15.5	9.5	12.5	15.1	65.1	23.7	73.3
1415	C2	GS3.1_13.03	GS3.1_13	776.3	14.0	10.5	12.5	15.4	67.1	26.2	68.0
1416	C2	GS3.1_13.04	GS3.1_13	600.6	12.5	9.5	13.4	18.5	66.6	25.0	71.9
1417	C2	GS3.1_13.05	GS3.1_13	918.7	15.5	10.0	12.9	15.5	67.1	26.5	66.3
1418	C2	GS3.1_13.06	GS3.1_13	600.4	13.5	8.5	13.8	15.2	66.9	25.2	67.5
1419	C2	GS3.1_190.1	GS3.1_190	987.0	16.0	10.5	11.6	15.8	64.4	25.2	74.4
1420	C2	GS3.1_190.2	GS3.1_190	761.4	16.5	10.0	11.6	15.4	66.8	24.2	76.1
1421	C2	GS3.1_190.3	GS3.1_190	1391.8	18.0	11.0	11.2	14.8	69.6	24.7	78.2
1422	C2	GS3.1_190.4	GS3.1_190	1116.5	18.0	11.0	11.8	15.5	65.4	27.0	76.1
1423	C2	GS3.1_12.01	GS3.1_12	380.9	14.5	7.0	7.8	9.4	65.4	27.0	63.3
1424	C2	GS3.1_12.02	GS3.1_12	421.2	13.5	8.5	9.5	11.1	68.2	25.6	60.3
1425	C2	GS3.1_12.03	GS3.1_12	583.0	15.5	8.5	9.2	10.1	67.1	26.0	65.4
1426	C2	GS3.1_12.04	GS3.1_12	430.1	13.0	8.5	8.4	10.1	68.1	24.7	64.1
1427	C2	GS3.1_101.01	GS3.1_101	1030.3	16.0	11.0	10.4	11.1	70.4	20.0	71.9
1428	C2	GS3.1_101.02	GS3.1_101	700.3	15.0	9.5	9.7	12.0	68.9	20.2	74.9
1429	C2	GS3.1_101.03	GS3.1_101	869.3	16.5	9.5	10.3	11.5	67.6	22.0	73.3
1430	C2	GS3.1_101.04	GS3.1_101	847.6	14.5	10.0	10.9	13.5	68.9	20.6	75.1
1431	C2	GS3.1_101.05	GS3.1_101	745.1	15.5	9.5	11.0	13.3	68.3	21.7	76.8
1432	C2	GS3.1_101.06	GS3.1_101	1013.5	16.5	11.0	8.7	11.3	70.4	19.6	71.8
1433	C2	GS3.1_2.01	GS3.1_2	1110.9	17.5	11.0	10.5	12.7	64.3	24.0	73.7
1434	C2	GS3.1_2.02	GS3.1_2	1055.3	16.5	10.5	12.1	13.4	66.5	22.6	73.8
1435	C2	GS3.1_2.03	GS3.1_2	848.3	13.5	10.5	12.1	15.3	65.2	22.8	74.0
1436	C2	GS3.1_2.04	GS3.1_2	723.7	14.0	10.0	11.0	14.5	62.2	22.6	67.8
1437	C2	GS3.1_2.05	GS3.1_2	1011.9	14.5	10.5	10.7	13.3	65.9	23.4	74.0
1438	C2	GS3.1_2.06	GS3.1_2	727.2	15.0	9.5	11.8	14.6	63.7	21.8	70.7
1439	C2	GS3.1_186.01	GS3.1_186	1046.7	16.5	11.0	9.4	10.4	71.1	20.5	67.5
1440	C2	GS3.1_186.02	GS3.1_186	881.4	15.5	10.5	9.2	10.0	68.9	22.3	70.2
1441	C2	GS3.1_186.03	GS3.1_186	975.1	14.0	11.5	10.1	13.1	68.3	23.5	72.5
1442	C2	GS3.1_186.04	GS3.1_186	909.4	16.0	10.5	9.9	12.7	66.7	26.0	68.7
1443	C2	GS3.1_186.05	GS3.1_186	868.9	16.5	11.0	11.3	11.8	68.0	20.9	69.9
1444	C2	GS3.1_186.06	GS3.1_186	786.2	16.0	9.5	10.3	11.8	68.6	23.1	71.1
1445	C2	GS3.1_188.01	GS3.1_188	1031.3	18.5	10.5	9.5	10.5	63.8	21.0	66.9
1446	C2	GS3.1_188.02	GS3.1_188	856.6	16.0	10.5	10.1	12.0	64.8	22.9	69.6
1447	C2	GS3.1_188.03	GS3.1_188	741.2	14.5	9.5	10.7	12.8	66.3	25.7	70.9
1448	C2	GS3.1_188.04	GS3.1_188	660.2	16.0	9.5	10.3	11.3	65.6	23.6	70.7
1449	C2	GS3.1_188.05	GS3.1_188	1009.6	16.5	10.5	8.5	10.5	66.6	19.7	68.9
1450	C2	GS3.1_188.06	GS3.1_188	777.2	15.5	9.5	8.9	9.9	70.6	19.4	62.1
1451	C2	GS3.1_184.01	GS3.1_184	981.0	21.0	10.0	12.4	13.5	62.2	25.3	64.1
1452	C2	GS3.1_184.02	GS3.1_184	1213.2	24.0	10.0	12.2	14.5	65.2	25.6	68.5
1453	C2	GS3.1_184.03	GS3.1_184	767.7	17.5	9.5	12.7	13.9	64.2	24.7	64.5
1454	C2	GS3.1_184.04	GS3.1_184	1160.4	22.0	10.5	11.3	14.9	67.3	25.3	66.4
1455	C2	GS3.1_184.05	GS3.1_184	976.7	21.0	10.0	12.0	16.4	63.1	25.6	71.0
1456	C2	GS3.1_184.06	GS3.1_184	778.4	19.5	9.5	13.2	14.3	64.9	27.3	69.3
1457	C2	GS3.1_104.01	GS3.1_104	884.9	15.5	10.0	12.2	15.1	65.0	24.7	71.0
1458	C2	GS3.1_104.02	GS3.1_104	679.1	15.5	9.0	12.4	16.4	66.9	25.7	79.9
1459	C2	GS3.1_104.03	GS3.1_104	864.8	15.5	9.0	15.6	13.3	65.8	24.0	74.4
1460	C2	GS3.1_104.04	GS3.1_104	942.6	15.5	10.5	11.3	18.0	68.6	21.6	75.4
1461	C2	GS3.1_104.05	GS3.1_104	1002.2	17.0	10.0	11.1	13.6	65.3	25.2	73.6
1462	C2	GS3.1_104.06	GS3.1_104	807.1	15.0	9.5	13.3		65.4	23.6	75.9
1463	C2	GS3.1_110.01	GS3.1_110	827.0	14.5	10.0	11.5	13.8	63.5	26.2	72.9
1464	C2	GS3.1_110.02	GS3.1_110	775.3	12.5	10.5	13.6	17.2	67.1	24.9	73.3
1465	C2	GS3.1_110.03	GS3.1_110	938.3	16.0	10.5	11.7	15.6	64.9	22.1	73.0
1466	C2	GS3.1_110.04	GS3.1_110	706.9	14.0	9.5	11.9	15.1	65.7	22.0	69.4
1467	C2	GS3.1_110.05	GS3.1_110	925.2	14.0	11.0	11.1	13.3	65.8	21.6	71.9
1468	C2	GS3.1_110.06	GS3.1_110	880.2	14.5	10.0	11.8	15.6	67.2	21.7	71.2
1469	C2	GS3.1_49.01	GS3.1_49	643.7	13.0	10.5	10.0	11.6	71.3	17.8	64.9
1470	C2	GS3.1_49.02	GS3.1_49	826.5	15.5	9.5	9.6	10.0	71.0	18.3	62.0
1471	C2	GS3.1_49.03	GS3.1_49	759.2	15.0	10.5	9.5	10.1	71.4	19.4	61.6
1472	C2	GS3.1_49.04	GS3.1_49	568.6	14.0	9.5	4.4	10.5	66.0	23.6	71.2
1473	C2	GS3.1_180.01	GS3.1_180	883.2	19.5	10.5	10.8	12.6	64.3	23.5	69.2
1474	C2	GS3.1_180.02	GS3.1_180	846.6	20.0	10.0	11.2	14.2	62.4	26.7	71.9
1475	C2	GS3.1_180.03	GS3.1_180	1174.5	20.0	11.5	11.9	17.2	63.7	24.7	73.3
1476	C2	GS3.1_180.04	GS3.1_180	786.3	18.0	10.0	11.6	15.7	64.1	24.1	71.8
1477	C2	GS3.1_180.05	GS3.1_180	921.3	20.0	10.5	11.1	15.3	64.9	23.7	72.1
1478	C2	GS3.1_180.06	GS3.1_180	996.2	22.0	10.5	11.5	13.6	63.7	24.0	64.2
1479	C2	GS3.1_167.01	GS3.1_167	963.4	15.5	11.0	10.2	12.3	65.2	24.3	72.0
1480	C2	GS3.1_167.02	GS3.1_167	819.8	15.5	10.5	11.0	13.2	65.0	24.4	72.3
1481	C2	GS3.1_167.03	GS3.1_167	796.6	16.0	10.5	10.0	12.5	63.8	23.8	73.9
1482	C2	GS3.1_167.04	GS3.1_167	700.8	16.0	10.0	11.1	13.5	65.3	25.0	74.8
1483	C2	GS3.1_167.05	GS3.1_167	763.0	16.5	10.0	11.0	14.4	64.7	26.6	74.6
1484	C2	GS3.1_167.06	GS3.1_167	886.6	17.0	10.5	11.3	13.8	67.3	22.3	70.2
1485	C2	GS3.1_34.01	GS3.1_34	847.6	19.5	9.0	8.5	9.4	68.6	19.3	65.2
1486	C2	GS3.1_34.02	GS3.1_34	850.7	19.0	10.0	9.4	13.5	67.2	22.5	71.2
1487	C2	GS3.1_34.03	GS3.1_34	802.9	20.0	9.5	8.7	11.6	66.9	22.1	72.3
1488	C2	GS3.1_34.04	GS3.1_34	947.4	21.0	11.0	8.7	10.9	65.8	23.3	69.5
1489	C2	GS3.1_34.05	GS3.1_34	576.6	18.5	9.0	10.4	12.1	65.2	22.3	72.4
1490	C2	GS3.1_34.06	GS3.1_34	764.8	21.0	10.0	10.5	13.2	65.5	23.0	70.0
1491	C2	GS3.1_163.01	GS3.1_163	988.2	17.0	10.5	11.0	14.5	63.3	26.6	72.0
1492	C2	GS3.1_163.02	GS3.1_163	745.8	18.0	9.5	12.2	13.8	62.2	26.1	68.6
1493	C2	GS3.1_163.03	GS3.1_163	874.4	16.5	10.0	12.4	14.5	64.9	27.1	71.4
1494	C2	GS3.1_163.04	GS3.1_163	768.8	18.5	9.5	12.2	15.6	63.4	27.4	70.8
1495	C2	GS3.1_163.05	GS3.1_163	618.4	15.0	9.0	12.0	15.4	63.1	26.4	69.1
1496	C2	GS3.1_163.06	GS3.1_163	540.4	16.0	8.5	11.2	15.2	61.5	25.6	69.3
1497	C2	GS3.1_161.01	GS3.1_161	657.3	14.5	9.0	11.1	13.6	67.8	24.2	71.0
1498	C2	GS3.1_161.02	GS3.1_161	723.4	15.0	9.0	11.0	12.1	64.2	24.7	68.9
1499	C2	GS3.1_161.03	GS3.1_161	824.8	15.0	9.5	11.9	13.6	65.8	25.5	66.3
1500	C2	GS3.1_161.04	GS3.1_161	828.6	15.0	10.0	10.0	11.3	64.2	23.8	70.2
1501	C2	GS3.1_161.05	GS3.1_161	843.5	14.5	10.5	11.8	12.9	64.6	28.1	68.3
1502	C2	GS3.1_161.06	GS3.1_161	656.1	13.5	9.5	11.1	14.8	70.0	22.8	67.8
1503	C2	GS3.1_89.01	GS3.1_89	1288.8	18.0	11.0	11.7	13.3	68.9	22.7	70.4
1504	C2	GS3.1_89.02	GS3.1_89	798.6	14.0	11.0	12.1	15.1	67.1	23.6	71.5
1505	C2	GS3.1_89.03	GS3.1_89	1777.6	19.0	13.0	9.8	11.2	63.6	24.6	71.3
1506	C2	GS3.1_78.01	GS3.1_78	812.3	14.5	10.5	10.6	11.7	63.7	24.2	71.2
1507	C2	GS3.1_78.02	GS3.1_78	926.3	15.0	11.0	11.7	14.2	68.9	23.8	76.7
1508	C2	GS3.1_78.03	GS3.1_78	748.1	14.0	10.5	11.0	13.4	67.2	23.2	75.5
1509	C2	GS3.1_78.04	GS3.1_78	594.0	14.5	9.5	10.6	11.7	65.6	22.5	71.1
1510	C2	GS3.1_78.05	GS3.1_78	794.3	15.5	9.0	10.6	12.3	64.7	25.9	72.6
1511	C2	GS3.1_78.06	GS3.1_78	822.4	15.0	10.5	9.3	12.1	66.9	23.3	72.7
1512	C2	GS3.1_29.01	GS3.1_29	780.1	22.0	10.0	9.5	11.1	63.5	24.8	70.9
1513	C2	GS3.1_29.02	GS3.1_29	756.1	21.0	9.5	8.8	10.1	65.3	22.6	67.0
1514	C2	GS3.1_29.03	GS3.1_29	1292.3	25.0	11.0	7.1	8.5	65.1	21.0	65.8
1515	C2	GS3.1_29.04	GS3.1_29	684.8	20.0	9.0	8.9	11.2	65.7	23.7	68.1
1516	C2	GS3.1_29.05	GS3.1_29	833.2	20.0	10.0	10.3	14.6	66.3	23.5	71.9
1517	C2	GS3.1_29.06	GS3.1_29	851.2	22.5	9.5	8.5	11.1	65.3	24.1	69.0
1518	C2	GS3.1_19.01	GS3.1_19	1094.8	18.0	10.5	11.9	24.2	68.8	24.0	73.5
1519	C2	GS3.1_19.02	GS3.1_19	899.8	15.5	11.0	11.7	13.9	67.3	24.9	67.3
1520	C2	GS3.1_19.03	GS3.1_19	1007.4	18.0	10.5	9.3	9.7	66.5	22.9	71.1
1521	C2	GS3.1_19.04	GS3.1_19	1059.5	17.0	11.0	11.2	12.6	66.5	24.7	73.5
1522	C2	GS3.1_19.05	GS3.1_19	1077.7	18.0	11.5	11.3	14.4	68.4	22.2	70.8
1523	C2	GS3.1_26.01	GS3.1_26	643.2	16.0	9.5	10.5	11.8	64.7	22.2	69.7
1524	C2	GS3.1_26.02	GS3.1_26	822.8	16.0	9.5	10.8	13.2	67.3	22.1	67.1
1525	C2	GS3.1_26.03	GS3.1_26	992.6	16.0	10.5	9.5	12.9	67.5	22.9	70.0
1526	C2	GS3.1_26.04	GS3.1_26	771.8	16.0	9.5	10.7	13.7	64.6	24.7	74.5
1527	C2	GS3.1_26.05	GS3.1_26	695.4	15.5	10.0	11.0	13.3	63.3	24.0	71.0
1528	C2	GS3.1_26.06	GS3.1_26	554.6	15.5	8.5	10.7	13.3	61.5	26.8	73.2
1529	C2	GS3.1_165.01	GS3.1_165	808.1	16.0	10.0	10.2	14.2	65.2	24.2	74.0
1530	C2	GS3.1_165.02	GS3.1_165	734.1	15.5	10.0	10.1	13.1	66.4	22.9	74.4
1531	C2	GS3.1_165.03	GS3.1_165	562.5	14.0	9.5	10.9	15.8	67.4	25.2	75.1
1532	C2	GS3.1_165.04	GS3.1_165	840.2	18.0	9.5	11.1	14.3	63.6	24.7	71.9
1533	C2	GS3.1_28.01	GS3.1_28	588.0	15.5	8.5	10.7	11.9	63.0	23.0	65.2
1534	C2	GS3.1_28.02	GS3.1_28	882.7	16.0	10.0	11.8	4.7	63.3	24.7	70.3
1535	C2	GS3.1_28.03	GS3.1_28	491.8	14.5	7.5	12.4	13.4	64.4	24.2	68.2
1536	C2	GS3.1_28.04	GS3.1_28	549.8	12.5	9.5	12.5	15.7	64.9	22.6	71.0
1537	C2	GS3.1_28.05	GS3.1_28	802.5	15.0	9.5	11.5	13.7	62.4	23.6	69.1
1538	C2	GS3.1_70.01	GS3.1_70	1039.4	16.0	11.5	10.3	12.4	64.9	29.0	65.5
1539	C2	GS3.1_70.02	GS3.1_70	644.4	15.0	10.0	9.1	10.0	63.1	25.1	69.6
1540	C2	GS3.1_70.03	GS3.1_70	604.1	14.0	10.0	10.6	13.9	65.1	27.5	69.8
1541	C2	GS3.1_70.04	GS3.1_70	651.5	14.5	9.5	7.4	8.1	68.1	22.3	63.5
1542	C2	GS3.1_70.05	GS3.1_70	605.7	14.0	10.0	9.0	9.6	65.2	23.3	66.4
1543	C2	GS3.1_70.06	GS3.1_70	594.0	14.0	9.5	8.6	9.1	68.2	21.0	64.8
1544	C2	GS3.1_150.01	GS3.1_150	605.0	15.5	8.5	12.0	14.2	67.0	23.6	76.4
1545	C2	GS3.1_150.02	GS3.1_150	731.1	16.0	9.0	8.9	17.0	69.3	21.2	77.7
1546	C2	GS3.1_150.03	GS3.1_150	859.6	16.5	10.0	10.0	14.3	67.6	25.0	77.2
1547	C2	GS3.1_150.04	GS3.1_150	746.0	15.0	9.5	11.6	15.0	66.1	22.8	72.3
1548	C2	GS3.1_150.05	GS3.1_150	667.2	15.5	8.5	11.7	14.0	66.6	23.3	76.3
1549	C2	GS3.1_150.06	GS3.1_150	580.9	14.5	9.0	12.5	15.5	66.5	25.2	76.1
1550	C2	GS3.1_71.01	GS3.1_71	664.2	15.5	9.0	13.0	20.1	65.9	27.3	77.0
1551	C2	GS3.1_71.02	GS3.1_71	890.3	17.0	10.5	12.9	17.9	66.2	27.3	77.5
1552	C2	GS3.1_71.03	GS3.1_71	579.1	13.5	9.0	14.2	18.8	65.3	29.4	75.7
1553	C2	GS3.1_71.04	GS3.1_71	677.4	16.0	9.0	13.5	16.5	63.1	25.0	74.1
1554	C2	GS3.1_71.05	GS3.1_71	590.0	15.0	9.0	14.4	17.0	63.7	29.7	75.0
1555	C2	GS3.1_82.01	GS3.1_82	789.9	16.0	10.0	10.9	15.3	63.1	24.4	72.9
1556	C2	GS3.1_82.02	GS3.1_82	814.3	15.0	11.0	12.0	15.5	62.2	25.0	71.5
1557	C2	GS3.1_82.03	GS3.1_82	928.9	18.0	10.5	11.9	14.3	60.7	24.4	68.7
1558	C2	GS3.1_82.04	GS3.1_82	838.2	17.0	10.0	11.2	16.7	63.7	24.8	73.1
1559	C2	GS3.1_82.05	GS3.1_82	952.5	16.0	10.5	11.0	14.1	64.1	24.4	72.4
1560	C2	GS3.1_82.06	GS3.1_82	1277.4	19.0	11.5	9.9	12.0	64.9	23.5	71.4
1561	C2	GS3.1_146.01	GS3.1_146	573.2	14.5	9.0	12.6	14.0	65.8	23.7	67.6
1562	C2	GS3.1_146.02	GS3.1_146	603.4	14.5	8.5		14.0	64.8	25.6	70.6
1563	C2	GS3.1_146.03	GS3.1_146	720.3	16.0	10.0	12.3	15.1	65.6	24.8	73.6
1564	C2	GS3.1_146.04	GS3.1_146	496.2	14.5	8.5	11.1	15.2	64.5	24.9	71.1
1565	C2	GS3.1_146.05	GS3.1_146	707.2	15.5	9.5	12.2	14.1	65.4	24.3	68.7
1566	C2	GS3.1_146.06	GS3.1_146	853.6	15.0	10.0	11.7	16.2	64.4	24.9	71.5
1567	C2	GS3.1_157.01	GS3.1_157	1228.6	19.5	11.0	12.1	15.2	61.7	29.7	70.5
1568	C2	GS3.1_157.02	GS3.1_157	1411.0	20.5	11.5	11.6	16.0	65.1	27.3	73.8
1569	C2	GS3.1_84.01	GS3.1_84	779.9	17.0	10.0	10.0	12.1	62.9	24.9	68.5
1570	C2	GS3.1_84.02	GS3.1_84	969.8	18.5	10.5	9.9	12.4	63.8	25.4	70.5
1571	C2	GS3.1_84.03	GS3.1_84	944.8	17.5	10.0	10.1	11.1	66.4	22.9	68.0
1572	C2	GS3.1_84.04	GS3.1_84	769.5	17.5	9.5	10.5	12.7	68.2	21.9	67.5
1573	C2	GS3.1_84.05	GS3.1_84	844.0	17.5	10.0	11.2	14.6	65.9	25.0	69.7
1574	C2	GS3.1_84.06	GS3.1_84	715.1	18.0	9.0	10.5	12.1	63.4	24.9	67.6
1575	C2	GS3.1_52.01	GS3.1_52	573.2	17.5	10.0	10.7	13.4	66.5	21.3	65.6
1576	C2	GS3.1_52.02	GS3.1_52	596.6	15.5	9.5	10.5	11.9	68.5	19.4	61.4
1577	C2	GS3.1_52.03	GS3.1_52	530.7	15.5	9.0	11.2	12.5	68.3	21.0	64.9
1578	C2	GS3.1_52.04	GS3.1_52	902.0	17.5	10.0	10.6	13.3	66.2	21.6	63.6
1579	C2	GS3.1_52.05	GS3.1_52	627.7	16.5	10.0	10.8	12.6	66.4	21.3	66.1
1580	C2	GS3.1_152.01	GS3.1_152	1324.0	18.0	12.0	11.1	14.2	66.0	25.1	74.7
1581	C2	GS3.1_152.02	GS3.1_152	938.1	16.5	11.0	11.3	15.4	64.9	25.9	73.7
1582	C2	GS3.1_152.03	GS3.1_152	1055.3	16.5	11.5	11.7	14.0	66.0	24.6	72.8
1583	C2	GS3.1_152.04	GS3.1_152	1125.3	17.5	12.0	10.0	11.9	62.9	24.4	70.4
1584	C2	GS3.1_74.01	GS3.1_74	623.8	14.5	9.5	11.9	14.3	63.0	27.4	74.7
1585	C2	GS3.1_74.02	GS3.1_74	583.2	14.0	9.0	11.6	13.9	64.5	24.9	72.9
1586	C2	GS3.1_74.03	GS3.1_74	962.4	14.5	10.5	12.0	14.6	63.2	25.8	73.1
1587	C2	GS3.1_74.04	GS3.1_74	844.9	14.5	10.0	11.1	13.5	65.9	25.0	74.1
1588	C2	GS3.1_74.05	GS3.1_74	854.2	14.0	10.5	12.3	14.1	65.7	26.4	74.8
1589	C2	GS3.1_74.06	GS3.1_74	1062.6	15.5	11.0	10.8	13.9	64.9	27.0	74.7
1590	C2	GS3.1_33.01	GS3.1_33	851.4	17.0	9.5	11.8	13.3	60.9	24.6	68.6
1591	C2	GS3.1_33.02	GS3.1_33	779.3	16.5	9.5	12.2	14.2	59.6	27.5	69.8
1592	C2	GS3.1_33.03	GS3.1_33	722.4	16.0	9.0	11.2	12.7	58.9	28.8	69.0
1593	C2	GS3.1_33.04	GS3.1_33	827.5	16.5	9.5	11.1	12.4	60.8	26.4	67.3
1594	C2	GS3.1_33.05	GS3.1_33	663.8	14.5	9.5	10.6	10.6	63.4	25.9	69.7
1595	C2	GS3.1_33.06	GS3.1_33	806.0	15.5	9.5		14.9	61.2	26.7	69.6
1596	C2	GS3.1_75.01	GS3.1_75	854.5	21.5	10.0	10.7	18.2	67.5	25.5	76.0
1597	C2	GS3.1_75.02	GS3.1_75	886.5	19.0	10.5	10.4	14.7	66.2	28.4	75.3
1598	C2	GS3.1_75.03	GS3.1_75	1048.7	21.5	10.0	10.1	14.6	65.0	27.6	74.0
1599	C2	GS3.1_75.04	GS3.1_75	842.6	19.0	10.0	11.7	14.3	64.5	27.5	76.2
1600	C2	GS3.1_75.05	GS3.1_75	816.0	18.5	9.5	11.1	13.5	64.7	25.4	71.9
1601	C2	GS3.1_75.06	GS3.1_75	1077.0	21.0	11.0	11.4	15.0	64.5	25.2	73.1
1602	C2	GS3.1_144.01	GS3.1_144	835.8	15.0	10.5	10.3	15.8	68.2	21.9	72.6
1603	C2	GS3.1_144.02	GS3.1_144	764.7	15.0	10.0	11.2	14.9	65.4	21.2	71.5
1604	C2	GS3.1_144.03	GS3.1_144	640.3	17.0	9.5	11.7	16.0	65.6	23.2	70.8
1605	C2	GS3.1_144.04	GS3.1_144	906.0	16.5	10.5	11.2	15.1	66.6	24.2	75.3
1606	C2	GS3.1_144.05	GS3.1_144	950.6	16.0	10.5	12.2	15.4	68.4	22.3	74.1
1607	C2	GS3.1_144.06	GS3.1_144	808.3	17.0	10.5	11.6	15.0	64.0	22.2	71.3
1608	C2	GS3.1_159.01	GS3.1_159	736.6	19.5	9.5	7.8	8.9	64.4	23.3	68.1
1609	C2	GS3.1_159.02	GS3.1_159	463.0	16.0	8.0	9.5	11.5	64.3	23.5	65.4
1610	C2	GS3.1_159.03	GS3.1_159	937.0	19.5	10.0	9.5	9.1	64.4	22.8	67.2
1611	C2	GS3.1_159.04	GS3.1_159	544.8	17.0	8.0	9.7	10.4	64.9	23.7	66.6
1612	C2	GS3.1_76.01	GS3.1_76	807.1	19.5	10.0	11.7	15.1	64.5	26.9	70.4
1613	C2	GS3.1_76.02	GS3.1_76	690.8	18.0	8.5	11.6	13.2	62.2	26.7	71.6
1614	C2	GS3.1_76.03	GS3.1_76	733.8	18.0	9.0	11.4	15.8	66.1	26.8	74.6
1615	C2	GS3.1_76.04	GS3.1_76	623.2	17.0	8.5	11.3	15.3	62.9	28.5	73.2
1616	C2	GS3.1_76.05	GS3.1_76	868.4	19.5	10.0	10.7	13.3	63.6	27.8	72.8
1617	C2	GS3.1_76.06	GS3.1_76	796.0	20.5	9.0	11.1	13.6	63.0	26.1	72.5
1618	C2	GS3.1_22.01	GS3.1_22	898.3	15.5	10.5	10.8	12.5	63.7	22.5	69.8
1619	C2	GS3.1_22.02	GS3.1_22	1077.5	16.5	10.5	11.2	12.8	64.7	24.8	68.6
1620	C2	GS3.1_22.03	GS3.1_22	1184.5	15.5	11.0	11.7	11.6	65.3	21.3	67.5
1621	C2	GS3.1_22.04	GS3.1_22	1056.5	16.0	10.0	10.7	12.2	64.0	20.4	65.7
1622	C2	GS3.1_61.01	GS3.1_61	718.4	16.5	10.5	12.5	15.9	65.9	22.5	73.5
1623	C2	GS3.1_61.02	GS3.1_61	1079.6	17.5	10.5	12.5	15.1	67.4	23.5	73.4
1624	C2	GS3.1_61.03	GS3.1_61	1041.7	18.5	11.0	13.6	15.6	64.7	25.1	74.6
1625	C2	GS3.1_50.01	GS3.1_50	1041.0	16.5	11.5	11.9	16.1	66.4	24.7	70.6
1626	C2	GS3.1_50.02	GS3.1_50	825.1	14.5	11.0	12.5	15.0	66.5	25.2	70.8
1627	C2	GS3.1_50.03	GS3.1_50	1405.2	17.5	12.5	11.6	12.9	66.6	25.0	71.6
1628	C2	GS3.1_50.04	GS3.1_50	930.7	14.0	11.5	12.5	13.8	67.1	26.4	73.6
1629	C2	GS3.1_50.05	GS3.1_50	1163.5	16.0	12.0	11.2	12.0	67.3	22.2	68.5
1630	C2	GS3.1_50.06	GS3.1_50	1072.4	16.5	11.5	12.7	13.8	62.7	27.5	69.3
1631	C2	GS3.1_44.01	GS3.1_44	892.8	19.5	10.5	10.1	11.7	63.5	21.0	71.6
1632	C2	GS3.1_44.02	GS3.1_44	680.0	16.5	10.0	12.1	15.4	65.5	23.9	72.9
1633	C2	GS3.1_44.03	GS3.1_44	716.1	15.5	10.0	10.6	10.7	65.1	20.4	66.9
1634	C2	GS3.1_35.01	GS3.1_35	1143.4	16.5	11.0	10.0	11.7	64.1	27.5	72.0
1635	C2	GS3.1_35.02	GS3.1_35	1311.1	17.0	12.0	10.5	11.6	66.4	24.8	72.0
1636	C2	GS3.1_35.03	GS3.1_35	1094.0	15.0	11.5	10.3	11.0	67.9	23.0	67.6
1637	C2	GS3.1_35.04	GS3.1_35	1227.7	16.5	11.5	8.9	10.4	66.4	26.4	71.3
1638	C2	GS3.1_35.05	GS3.1_35	591.0	13.5	9.0	13.3	16.5	65.9	27.5	71.5
1639	C2	GS3.1_35.06	GS3.1_35	1025.1	15.0	11.5	10.6	12.2	65.3	24.4	70.5
1640	C2	GS3.1_162.01	GS3.1_162	830.7	16.5	9.5	10.8	13.7	63.2	26.3	74.1
1641	C2	GS3.1_162.02	GS3.1_162	824.7	18.0	10.0	11.3	16.6	62.6	28.0	73.3
1642	C2	GS3.1_162.03	GS3.1_162	771.7	16.0	10.0	10.3	14.6	67.1	24.0	72.6
1643	C2	GS3.1_162.04	GS3.1_162	903.3	17.0	10.5	11.2	15.1	63.6	27.9	73.7
1644	C2	GS3.1_162.05	GS3.1_162	899.6	17.0	10.0		14.4	65.7	26.6	73.2
1645	C2	GS3.1_162.06	GS3.1_162	884.2	16.5	10.5	10.2	13.1	60.5	26.8	70.3
1646	C2	GS3.1_91.01	GS3.1_91	672.2	15.5	10.0	9.5	9.6	69.0	22.6	59.1
1647	C2	GS3.1_142.01	GS3.1_142	863.1	15.0	10.5	12.7	17.9	62.2	29.9	72.5
1648	C2	GS3.1_142.02	GS3.1_142	824.8	14.0	10.5	12.2	15.7	63.3	25.4	72.1
1649	C2	GS3.1_142.03	GS3.1_142	792.1	15.0	10.5	13.7	15.7	64.4	26.5	71.6
1650	C2	GS3.1_142.04	GS3.1_142	809.8	13.5	10.5	12.9	14.2	64.3	23.5	70.9
1651	C2	GS3.1_142.05	GS3.1_142	644.9	14.5	9.0	13.1	17.0	60.4	28.2	72.7
1652	C2	GS3.1_142.06	GS3.1_142	814.4	15.0	10.5	13.0	16.1	61.1	28.1	71.3
1653	C2	GS3.1_7.01	GS3.1_7	1194.9	17.5	10.5	9.3	10.1	66.3	24.6	73.4
1654	C2	GS3.1_7.02	GS3.1_7	1082.1	18.5	10.0	9.6	9.6	63.8	23.9	68.6
1655	C2	GS3.1_7.03	GS3.1_7	1080.7	17.0	10.5	10.1	11.1	66.8	23.4	68.8
1656	C2	GS3.1_132.01	GS3.1_132	876.0	16.5	10.5	10.7	9.1	64.3	26.6	70.9
1657	C2	GS3.1_132.02	GS3.1_132	868.0	16.0	10.5	10.0	12.0	64.9	28.0	72.5
1658	C2	GS3.1_132.03	GS3.1_132	1119.9	17.5	11.0	9.8	10.8	65.6	26.9	71.9
1659	C2	GS3.1_132.04	GS3.1_132	1039.9	17.5	11.0	10.3	11.9	64.3	27.5	71.6
1660	C2	GS3.1_132.05	GS3.1_132	755.3	15.0	10.0	10.4	11.7	65.5	26.1	68.4
1661	C2	GS3.1_132.06	GS3.1_132	933.3	16.5	10.5	10.0	11.7	62.9	26.1	68.4
1662	C2	GS3.1_175.01	GS3.1_175	846.3	16.0	10.5	10.9	13.8	65.2	26.5	74.9
1663	C2	GS3.1_175.02	GS3.1_175	669.2	14.5	9.5	10.0	13.1	66.8	23.6	69.3
1664	C2	GS3.1_175.03	GS3.1_175	709.8	15.5	9.5	11.5	14.0	66.9	25.5	76.1
1665	C2	GS3.1_175.04	GS3.1_175	648.8	15.0	10.0	11.3	13.3	66.1	26.7	71.4
1666	C2	GS3.1_175.05	GS3.1_175	990.6	16.0	11.0	10.7	12.8	67.9	25.2	74.2
1667	C2	GS3.1_175.06	GS3.1_175	851.7	15.0	10.0	11.8	13.7	67.5	24.8	72.6
1668	C2	GS3.1_178.01	GS3.1_178	722.7	15.0	9.0	11.3	12.5	63.0	25.1	70.1
1669	C2	GS3.1_178.02	GS3.1_178	658.1	14.5	9.0	11.5	15.0	63.0	26.7	69.5
1670	C2	GS3.1_178.03	GS3.1_178	892.0	15.0	10.0	11.1	10.9	62.3	25.1	66.5
1671	C2	GS3.1_178.04	GS3.1_178	881.2	14.5	10.0	11.0	12.6	64.2	23.8	70.5
1672	C2	GS3.1_178.05	GS3.1_178	591.3	15.0	9.0	11.4	14.8	64.4	25.5	67.3
1673	C2	GS3.1_178.06	GS3.1_178	845.8	16.0	9.5	11.1	11.8	63.0	26.2	66.7
1674	C2	GS3.1_18.01	GS3.1_18	925.2	15.0	10.5	12.7	15.1	64.7	27.1	71.1
1675	C2	GS3.1_18.02	GS3.1_18	899.1	16.0	10.5	12.6	14.3	64.6	25.7	69.1
1676	C2	GS3.1_18.03	GS3.1_18	760.3	14.0	10.0	11.6	13.8	63.2	28.5	70.3
1677	C2	GS3.1_18.04	GS3.1_18	884.7	16.0	10.0	11.4	14.3	64.4	27.7	73.7
1678	C2	GS3.1_18.05	GS3.1_18	772.6	14.0	10.5	11.5	12.9	65.1	24.8	68.0
1679	C2	GS3.1_18.06	GS3.1_18	918.3	15.0	10.5	12.7	15.9	61.9	30.2	72.5
1680	C2	GS3.1_92.01	GS3.1_92	932.4	17.5	10.0	8.8	8.9	67.1	20.8	61.8
1681	C2	GS3.1_92.02	GS3.1_92	746.2	17.0	9.5	8.7	10.0	68.1	21.4	62.4
1682	C2	GS3.1_92.03	GS3.1_92	1037.5	18.5	11.0	8.6	9.3	63.9	22.5	66.0
1683	C2	GS3.1_92.04	GS3.1_92	975.5	17.0	10.5	11.6	11.5	63.9	23.2	69.5
1684	C2	GS3.1_92.05	GS3.1_92	590.5	15.0	9.5	10.1	9.9	66.3	21.8	62.3
1685	C2	GS3.1_92.06	GS3.1_92	575.4	15.5	9.0	11.6	12.2	66.5	24.0	69.7
1686	C2	GS3.1_151.01	GS3.1_151	504.3	14.5	9.0	13.4	14.4	65.6	27.0	70.9
1687	C2	GS3.1_151.02	GS3.1_151	858.1	15.5	10.0	12.2	12.7	64.7	21.8	67.6
1688	C2	GS3.1_151.03	GS3.1_151	865.3	18.0	10.0	13.4	15.0	64.5	25.6	68.5
1689	C2	GS3.1_151.04	GS3.1_151	908.5	17.0	10.0	12.3	13.5	65.1	26.6	69.6
1690	C2	GS3.1_151.05	GS3.1_151	829.8	16.0	10.5	12.3	15.0	60.6	24.6	73.1
1691	C2	GS3.1_151.06	GS3.1_151	766.2	16.0	10.0	11.4	14.0	66.8	21.4	68.1
1692	C2	GS3.1_103.01	GS3.1_103	934.0	18.0	10.5	9.2	9.2	69.9	18.3	56.3
1693	C2	GS3.1_103.02	GS3.1_103	605.9	15.5	10.0	8.6	8.7	69.9	19.8	59.2
1694	C2	GS3.1_85.01	GS3.1_85	895.2	16.5	10.0	11.7	12.7	64.6	25.5	71.0
1695	C2	GS3.1_85.02	GS3.1_85	943.3	15.0	11.0	11.0	15.0	67.9	21.3	67.9
1696	C2	GS3.1_85.03	GS3.1_85	1174.2	18.0	11.0	10.5	10.8	63.9	24.2	70.7
1697	C2	GS3.1_85.04	GS3.1_85	545.8	12.5	9.0	10.4	11.7	68.3	23.5	66.2
1698	C2	GS3.1_85.05	GS3.1_85	897.6	14.5	11.0	10.2	12.2	69.1	21.5	64.3
1699	C2	GS3.1_85.06	GS3.1_85	989.8	16.0	10.5	11.3	12.4	65.5	22.7	68.3
1700	C2	GS3.1_177.01	GS3.1_177	763.7	18.0	9.5	11.1	13.2	60.9	26.6	68.9
1701	C2	GS3.1_177.02	GS3.1_177	679.1	18.0	9.0	13.3	15.7	61.7	26.6	67.4
1702	C2	GS3.1_177.03	GS3.1_177	752.1	17.0	9.5	12.7	15.8	61.4	27.0	69.8
1703	C2	GS3.1_177.04	GS3.1_177	871.5	19.5	9.5	12.0		62.3	24.5	68.9
1704	C2	GS3.1_177.05	GS3.1_177	949.3	20.0	10.0	11.9	13.8	63.3	24.5	68.9
1705	C2	GS3.1_177.06	GS3.1_177	854.1	18.5	9.5	12.1	14.6	61.8	23.2	66.0
1706	C2	GS3.1_153.01	GS3.1_153	677.4	16.5	9.0	12.2	14.2	66.4	24.0	70.3
1707	C2	GS3.1_153.02	GS3.1_153	432.6	16.5	8.0	14.0	16.2	62.8	25.7	69.6
1708	C2	GS3.1_153.03	GS3.1_153	453.4	15.5	7.5	12.0	11.8	63.6	24.9	67.2
1709	C2	GS3.1_153.04	GS3.1_153	600.8	16.0	8.0	12.1	14.1	59.9	25.8	69.1
1710	C2	GS3.1_153.05	GS3.1_153	563.1	15.5	8.5	12.6	14.9	62.3	25.2	71.1
1711	C2	GS3.1_153.06	GS3.1_153	652.1	17.5	9.5	11.2	13.8	62.1	23.2	68.7
1712	C2	GS3.1_32.01	GS3.1_32	1075.4	16.0	11.0	13.4	17.3	65.3	26.4	73.9
1713	C2	GS3.1_32.02	GS3.1_32	1115.4	17.0	11.0	13.2	14.7	60.6	27.3	67.4
1714	C2	GS3.1_32.03	GS3.1_32	1098.8	15.0	11.0	13.9	16.1	65.0	27.7	73.3
1715	C2	GS3.1_32.04	GS3.1_32	1078.9	16.5	11.0	12.2	13.9	64.2	28.3	70.7
1716	C2	GS3.1_32.05	GS3.1_32	861.9	15.0	10.5	12.7	16.8	63.7	28.0	74.6
1717	C2	GS3.1_32.06	GS3.1_32	1224.2	16.5	12.0	12.8	17.8	63.9	27.8	73.2
1718	C2	GS3.1_40.01	GS3.1_40	640.7	14.5	10.0	9.0	9.8	66.1	24.9	68.9
1719	C2	GS3.1_40.02	GS3.1_40	1007.0	16.0	11.5	9.0	10.0	66.8	21.8	68.7
1720	C2	GS3.1_40.03	GS3.1_40	997.1	16.0	11.0	9.8	10.8	66.8	24.0	68.6
1721	C2	GS3.1_121.01	GS3.1_121	642.4	16.5	10.5	14.6	17.7	63.3	27.6	68.2
1722	C2	GS3.1_121.02	GS3.1_121	740.3	18.5	10.0	14.4	18.0	62.6	28.1	70.9
1723	C2	GS3.1_121.03	GS3.1_121	737.0	16.0	9.5	13.6	16.7	63.0	26.1	71.1
1724	C2	GS3.1_121.04	GS3.1_121	487.8	15.5	9.5	12.8	17.7	62.5	29.1	73.5
1725	C2	GS3.1_189.01	GS3.1_189	1020.9	19.0	10.0	12.4	14.5	64.0	27.2	72.8
1726	C2	GS3.1_189.02	GS3.1_189	1514.4	19.0	12.0	12.4	13.9	65.3	26.8	75.9
1727	C2	GS3.1_189.03	GS3.1_189	735.8	18.0	9.5	12.3	15.0	62.4	32.8	68.2
1728	C2	GS3.1_189.04	GS3.1_189	995.4	18.0	10.5	10.4	15.2	65.2	27.6	75.4
1729	C2	GS3.1_189.05	GS3.1_189	601.8	16.0	9.0	12.6	16.4	65.6	26.6	76.5
1730	C2	GS3.1_179.01	GS3.1_179	968.1	17.5	11.0	11.7	14.3	64.1	25.0	69.9
1731	C2	GS3.1_179.02	GS3.1_179	1071.3	18.5	11.0	11.9	13.9	62.1	28.9	68.1
1732	C2	GS3.1_179.03	GS3.1_179	874.3	17.0	10.0	13.7	15.0	63.1	28.2	69.3
1733	C2	GS3.1_179.04	GS3.1_179	875.7	18.0	10.5	12.1	14.1	63.1	26.3	66.0
1734	C2	GS3.1_179.05	GS3.1_179	822.1	17.0	9.5	12.5	14.2	63.4	26.6	70.2
1735	C2	GS3.1_179.06	GS3.1_179	1118.0	17.5	11.5	12.1	15.0	64.3	27.4	70.4
1736	C2	GS3.1_140.01	GS3.1_140	958.0	16.5	10.0	13.5	16.6	65.0	28.6	76.2
1737	C2	GS3.1_140.02	GS3.1_140	578.6	15.0	9.0	11.6	14.0	62.8	26.9	72.5
1738	C2	GS3.1_140.03	GS3.1_140	854.8	15.5	10.0	12.8	15.6	64.7	24.4	71.1
1739	C2	GS3.1_140.04	GS3.1_140	751.3	17.5	10.0	12.6	16.5	63.7	27.0	69.2
1740	C2	GS3.1_140.05	GS3.1_140	755.7	16.0	9.5	10.1	12.3	63.2	26.4	71.6
1741	C2	GS3.1_140.06	GS3.1_140	564.6	15.5	8.5	10.6	12.5	61.6	24.6	68.1
1742	C2	GS3.1_126.01	GS3.1_126	642.0	16.0	9.0	10.6	12.0	62.1	26.6	72.5
1743	C2	GS3.1_126.02	GS3.1_126	726.3	16.0	10.0	10.4	14.0	65.9	22.6	69.4
1744	C2	GS3.1_126.03	GS3.1_126	940.0	16.5	11.0	11.2	12.7	65.8	24.1	69.3
1745	C2	GS3.1_126.04	GS3.1_126	614.6	16.0	9.0	11.0	13.9	64.8	24.3	72.2
1746	C2	GS3.1_126.05	GS3.1_126	847.4	16.0	10.0	11.3	13.0	67.3	22.9	70.7
1747	C2	GS3.1_126.06	GS3.1_126	683.0	15.0	10.0	11.0	13.1	63.6	23.3	70.0
1748	C2	GS3.1_137.01	GS3.1_137	917.3	20.0	10.5	11.6	13.0	65.0	26.9	72.4
1749	C2	GS3.1_137.02	GS3.1_137	1357.6	20.5	11.5	10.1	12.2	65.0	25.2	71.1
1750	C2	GS3.1_137.03	GS3.1_137	787.3	17.0	10.0	10.4	12.0	64.7	25.8	70.8
1751	C2	GS3.1_137.04	GS3.1_137	1161.3	21.0	10.5	11.4	13.3	64.2	28.5	75.5
1752	C2	GS3.1_97.01	GS3.1_97	568.6	13.5	9.5	11.6	15.2	63.3	27.4	73.7
1753	C2	GS3.1_97.02	GS3.1_97	911.7	17.0	10.5	13.0	16.6	66.9	25.2	73.7
1754	C2	GS3.1_97.03	GS3.1_97	771.8	15.5	9.5	12.6	18.1	65.4	26.5	76.5
1755	C2	GS3.1_97.04	GS3.1_97	1174.9	17.5	9.5	12.7	16.9	64.6	24.3	72.8
1756	C2	GS3.1_97.05	GS3.1_97	820.0	15.5	10.0	10.8	13.9	64.0	24.9	71.5
1757	C2	GS3.1_97.06	GS3.1_97	1032.8	18.5	10.0	13.2	17.3	65.9	25.5	74.2
1758	C2	GS3.1_123.01	GS3.1_123	410.2	13.0	8.5	13.2	15.5	66.2	25.1	67.4
1759	C2	GS3.1_123.02	GS3.1_123	574.3	15.0	10.0	11.9	14.7	65.0	27.4	67.0
1760	C2	GS3.1_123.03	GS3.1_123	771.3	16.5	10.0	12.7	13.5	64.7	25.3	68.4
1761	C2	GS3.1_53.01	GS3.1_53	442.4	13.5	9.0	9.5	10.7	69.4	23.4	63.6
1762	C2	GS3.1_25.02	GS3.1_25	557.5	14.0	8.5	8.8	9.3	66.8	25.5	67.3
1763	C2	GS3.1_25.03	GS3.1_25	505.0	13.0	8.5	10.1	10.8	66.2	24.8	68.2
1764	C2	GS3.1_25.04	GS3.1_25	813.4	16.5	9.5	9.4	10.3	67.3	21.9	61.9
1765	C2	GS3.1_25.05	GS3.1_25	848.5	15.5	9.0	8.9	9.1	69.9	18.3	60.6
1766	C2	GS3.1_25.06	GS3.1_25	567.4	14.5	9.0	8.6	8.8	69.6	22.0	62.1
1767	C2	GS3.1_115.01	GS3.1_115	758.9	14.5	9.5	11.6	12.2	62.2	27.1	72.4
1768	C2	GS3.1_115.02	GS3.1_115	1056.3	15.0	10.0	12.8	14.5	63.7	26.4	72.9
1769	C2	GS3.1_115.03	GS3.1_115	891.8	15.5	10.5	11.4	15.6	63.1	27.3	73.4
1770	C2	GS3.1_115.04	GS3.1_115	801.8	14.0	10.0	12.1	14.9	64.5	26.8	74.5
1771	C2	GS3.1_115.05	GS3.1_115	852.6	13.5	10.0	12.0	15.1	63.9	26.4	73.2
1772	C2	GS3.1_128.01	GS3.1_128	729.5	16.5	9.0	13.6	16.9	62.4	26.7	71.7
1773	C2	GS3.1_128.02	GS3.1_128	623.3	17.5	9.0	13.6	18.2	65.0	24.8	72.4
1774	C2	GS3.1_128.03	GS3.1_128	666.7	17.5	9.0	10.1	14.5	63.5	26.2	72.1
1775	C2	GS3.1_128.04	GS3.1_128	938.0	18.5	10.0	13.0	17.5	64.7	27.5	73.8
1776	C2	GS3.1_79.01	GS3.1_79	919.3	17.5	9.5	7.7	8.0	66.9	24.6	69.1
1777	C2	GS3.1_79.02	GS3.1_79	709.9	14.5	9.5	8.7	8.9	65.9	25.5	70.0
1778	C2	GS3.1_79.03	GS3.1_79	982.2	17.5	10.5	8.2	8.3	66.7	24.5	69.4
1779	C2	GS3.1_79.04	GS3.1_79	938.3	16.5	9.5	7.4	7.5	67.8	23.5	68.1
1780	C2	GS3.1_185.01	GS3.1_185	862.8	14.5	9.0	11.0	15.3	65.8	25.0	75.4
1781	C2	GS3.1_185.02	GS3.1_185	1169.1	16.0	10.5	9.6	13.3	64.9	25.6	75.6
1782	C2	GS3.1_185.03	GS3.1_185	999.3	15.0	10.0	10.6	14.3	66.3	23.9	75.8
1783	C2	GS3.1_185.04	GS3.1_185	864.6	14.5	9.0	10.2	13.4	64.9	25.3	75.1
1784	C2	GS3.1_185.05	GS3.1_185	873.8	15.0	9.5	11.2	13.3	62.7	24.4	72.4
1785	C2	GS3.1_185.06	GS3.1_185	596.1	15.0	8.0	10.9	16.0	63.1	27.0	72.8
1786	C2	GS3.1_11.01	GS3.1_11	945.8	15.5	10.0	13.2	14.9	60.8	27.4	68.7
1787	C2	GS3.1_11.02	GS3.1_11	673.6	16.5	8.0	12.5	15.1	61.5	25.3	67.5
1788	C2	GS3.1_11.03	GS3.1_11	713.8	14.5	9.5	12.2	13.8	60.5	30.3	71.1
1789	C2	GS3.1_11.04	GS3.1_11	676.4	15.0	9.0	13.0	14.1	60.9	25.7	65.8
1790	C2	GS3.1_11.05	GS3.1_11	1053.6	16.5	9.5	11.9	13.8	63.3	27.8	71.1
1791	C2	GS3.1_11.06	GS3.1_11	892.4	16.0	9.0	12.2	13.1	60.9	28.2	71.1
1792	C2	GS3.1_8.01	GS3.1_8	1254.8	20.5	10.5	12.9	16.7	64.5	28.3	74.9
1793	C2	GS3.1_8.02	GS3.1_8	862.3	18.5	10.0	13.6	16.6	62.8	30.5	75.1
1794	C2	GS3.1_8.03	GS3.1_8	989.3	20.5	10.5	12.1	15.4	62.4	27.3	71.5
1795	C2	GS3.1_8.04	GS3.1_8	1074.6	19.5	10.5	13.7	16.3	64.4	27.6	74.6
1796	C2	GS3.1_8.05	GS3.1_8	1067.3	20.5	10.5	13.6	17.4	64.6	29.3	75.0
1797	C2	GS3.1_8.06	GS3.1_8	975.9	19.0	10.5	12.3	16.3	64.2	28.6	73.7
1798	C2	GS3.1_67.01	GS3.1_67	871.3	17.5	11.0	11.5	15.4	61.9	31.8	67.3
1799	C2	GS3.1_67.02	GS3.1_67	760.4	15.5	10.5	12.7	15.8	66.1	28.7	75.5
1800	C2	GS3.1_67.03	GS3.1_67	899.1	15.0	11.0	12.1	14.5	66.9	28.6	71.1
1801	C2	GS3.1_67.04	GS3.1_67	1071.3	18.0	10.5	11.8	16.5	65.7	28.3	74.9
1802	C2	GS3.1_67.05	GS3.1_67	832.9	15.5	10.0	12.6	16.1	65.8	29.2	74.4
1803	C2	GS3.1_67.06	GS3.1_67	892.1	16.0	11.0	13.0	14.6	65.0	28.5	73.4
1804	C2	GS3.1_176.01	GS3.1_176	848.0	13.5	10.5	12.0	14.7	63.4	25.9	72.2
1805	C2	GS3.1_176.02	GS3.1_176	717.6	15.0	9.5	10.3	12.0	64.5	25.2	72.6
1806	C2	GS3.1_176.03	GS3.1_176	782.2	13.0	9.5	11.7	13.5	67.4	25.4	71.9
1807	C2	GS3.1_176.04	GS3.1_176	688.4	13.0	9.5	12.5	13.7	64.5	25.1	71.8
1808	C2	GS3.1_176.05	GS3.1_176	609.3	12.5	9.5	12.0	14.0	63.7	27.1	72.9
1809	C2	GS3.1_176.06	GS3.1_176	971.8	13.5	11.0	12.1	13.8	65.0	27.7	72.5
1810	C2	GS3.1_14.01	GS3.1_14	762.4	19.0	8.5	12.9	14.5	60.9	29.3	70.9
1811	C2	GS3.1_14.02	GS3.1_14	576.1	18.0	8.0	12.1	13.6	58.4	27.5	67.7
1812	C2	GS3.1_14.03	GS3.1_14	752.7	18.0	9.0	12.7	17.7	60.4	28.4	72.7
1813	C2	GS3.1_14.04	GS3.1_14	880.1	20.0	8.5	10.6	13.1	62.7	28.1	70.0
1814	C2	GS3.1_14.05	GS3.1_14	883.0	19.0	9.0	12.8	12.0	60.6	28.6	73.0
1815	C2	GS3.1_56.01	GS3.1_56	1055.5	17.5	10.5	12.9	14.7	64.9	26.8	72.9
1816	C2	GS3.1_56.02	GS3.1_56	1175.6	19.5	10.5	11.0	13.4	61.7	25.3	69.1
1817	C2	GS3.1_56.03	GS3.1_56	814.8	16.0	10.0	12.7	15.2	64.1	28.0	73.4
1818	C2	GS3.1_56.04	GS3.1_56	1177.2	18.0	10.5	12.1	14.1	63.3	27.9	73.7
1819	C2	GS3.1_56.05	GS3.1_56	1072.5	17.0	10.5	12.0	14.7	64.4	26.6	76.0
1820	C2	GS3.1_56.06	GS3.1_56	675.4	15.5	9.5	12.1	14.7	62.7	29.1	71.4
1821	C2	GS3.1_130.01	GS3.1_130	833.6	15.5	10.0	12.0	16.9	64.8	30.5	73.2
1822	C2	GS3.1_130.02	GS3.1_130	717.0	15.0	9.5	12.4	14.5	65.0	29.0	71.1
1823	C2	GS3.1_130.03	GS3.1_130	698.6	15.0	9.5	12.4	16.4	63.9	29.5	73.9
1824	C2	GS3.1_130.04	GS3.1_130	701.7	15.0	10.0	12.5	17.2	63.1	34.4	68.8
1825	C2	GS3.1_130.05	GS3.1_130	693.6	14.5	10.0	12.8	16.4	64.2	29.4	72.6
1826	C2	GS3.1_130.06	GS3.1_130	771.5	16.5	10.0	11.9	15.4	63.6	28.8	72.3
1827	C2	GS3.1_181.01	GS3.1_181	1086.0	17.0	11.0	12.0	15.1	64.8	26.2	71.4
1828	C2	GS3.1_181.02	GS3.1_181	908.9	15.5	10.5	12.4	15.4	65.2	25.2	72.3
1829	C2	GS3.1_181.03	GS3.1_181	882.7	16.0	10.0	9.4	15.7	66.5	25.6	67.1
1830	C2	GS3.1_181.04	GS3.1_181	866.3	16.5	10.5	13.2	15.2	61.8	27.6	70.6
1831	C2	GS3.1_181.05	GS3.1_181	876.8	16.0	10.0	12.6	14.2	65.4	26.4	72.0
1832	C2	GS3.1_181.06	GS3.1_181	822.3	15.0	10.0	12.5	15.0	64.4	26.9	70.4
1833	C2	GS3.1_125.01	GS3.1_125	534.2	13.0	8.5	11.8	15.4	64.4	27.6	73.9
1834	C2	GS3.1_125.02	GS3.1_125	668.0	13.0	9.0	10.9	13.1	63.2	26.7	72.4
1835	C2	GS3.1_125.03	GS3.1_125	853.4	15.5	10.0	10.6	13.6	63.9	28.5	75.2
1836	C2	GS3.1_125.04	GS3.1_125	849.5	14.0	10.0	12.4	13.9	64.9	28.5	75.4
1837	C2	GS3.1_125.05	GS3.1_125	633.1	14.0	9.0	12.2	15.9	64.7	27.3	75.5
1838	C2	GS3.1_125.06	GS3.1_125	665.9	14.0	9.0	10.9	14.8	65.5	28.2	77.2
1839	C2	GS3.1_87.01	GS3.1_87	585.5	17.0	9.5	7.7	8.9	65.6	24.5	61.1
1840	C2	GS3.1_87.02	GS3.1_87	633.2	16.5	9.5	11.5	13.3	64.1	27.2	65.2
1841	C2	GS3.1_87.03	GS3.1_87	601.4	17.0	9.5	10.5	11.8	65.3	24.2	62.9
1842	C2	GS3.1_129.01	GS3.1_129	629.6	16.0	9.0	10.8	11.8	65.3	22.4	62.9
1843	C2	GS3.1_129.02	GS3.1_129	626.4	16.0	9.0	10.4	11.7	62.1	21.9	66.8
1844	C2	GS3.1_108.01	GS3.1_108	544.8	13.0	9.0	12.0	14.5	63.5	28.3	74.2
1845	C2	GS3.1_108.02	GS3.1_108	583.6	14.0	9.5	12.4	14.4	62.3	28.0	70.3
1846	C2	GS3.1_108.03	GS3.1_108	780.0	14.5	11.0	12.0	14.2	64.9	25.3	71.8
1847	C2	GS3.1_108.04	GS3.1_108	762.6	15.5	10.0	11.3	13.2	64.1	27.8	71.5
1848	C2	GS3.1_108.05	GS3.1_108	625.9	15.0	9.0	11.7	12.9	62.6	28.1	72.6
1849	C2	GS3.1_108.06	GS3.1_108	998.7	14.5	10.5	11.8	13.8	65.4	27.3	74.3
1850	C2	GS3.1_10.01	GS3.1_10	671.0	15.5	9.5	11.9	13.7	61.7	34.2	63.6
1851	C2	GS3.1_10.02	GS3.1_10	786.5	16.0	9.5	10.9	12.4	63.0	27.8	66.5
1852	C2	GS3.1_10.03	GS3.1_10	544.1	16.0	9.0	10.7	12.1	64.4	26.1	67.7
1853	C2	GS3.1_10.04	GS3.1_10	920.8	18.0	10.5	8.2	8.8	65.0	23.2	66.9
1854	C2	GS3.1_10.05	GS3.1_10	926.0	17.0	10.5	9.6	10.7	64.6	24.2	67.3
1855	C2	GS3.1_10.06	GS3.1_10	782.5	17.0	9.5	10.6	11.7	64.7	25.2	68.7
1856	C2	GS3.1_59.01	GS3.1_59	818.7	18.0	10.0	10.8	12.0	63.8	26.7	71.2
1857	C2	GS3.1_59.02	GS3.1_59	878.5	17.5	10.5	11.6	12.6	65.0	27.1	68.4
1858	C2	GS3.1_59.03	GS3.1_59	815.7	16.0	10.0	12.3	13.6	62.3	27.8	72.0
1859	C2	GS3.1_59.04	GS3.1_59	709.8	16.5	10.0	11.9	13.2	62.4	27.7	67.4
1860	C2	GS3.1_59.05	GS3.1_59	811.2	18.0	10.5	11.9	14.7	64.0	27.5	73.0
1861	C2	GS3.1_59.06	GS3.1_59	552.4	15.5	9.0	12.9	13.4	62.5	28.6	70.6
1862	C2	GS3.1_96.01	GS3.1_96	778.1	14.5	9.5	13.0	15.5	65.0	26.6	73.0
1863	C2	GS3.1_96.02	GS3.1_96	450.9	13.0	8.0	12.4	16.5	61.5	27.2	70.2
1864	C2	GS3.1_96.03	GS3.1_96	700.7	14.5	9.0	12.2	13.2	62.5	28.6	72.8
1865	C2	GS3.1_96.04	GS3.1_96	671.8	15.0	9.0	12.7	14.8	61.1	28.4	70.1
1866	C2	GS3.1_96.05	GS3.1_96	989.4	15.0	10.0	11.6	13.1	63.4	28.6	71.4
1867	C2	GS3.1_96.06	GS3.1_96	711.0	14.0	9.5	11.3	13.2	63.6	27.8	70.8
1868	C2	GS3.1_171.01	GS3.1_171	714.3	20.0	9.0	12.9	15.1	62.1	24.8	67.7
1869	C2	GS3.1_171.02	GS3.1_171	798.0	19.5	10.0	11.9	14.7	62.2	24.5	70.7
1870	C2	GS3.1_171.03	GS3.1_171	939.5	20.0	10.0	12.4	16.3	64.9	25.3	71.0
1871	C2	GS3.1_171.04	GS3.1_171	869.8	20.5	9.5	12.2	15.5	64.5	26.4	72.4
1872	C2	GS3.1_171.05	GS3.1_171	1013.8	21.0	10.0	12.9	14.5	63.5	22.7	67.2
1873	C2	GS3.1_171.06	GS3.1_171	722.4	20.5	9.5	12.0	17.1	63.3	24.6	69.6
1874	C2	GS3.1_141.01	GS3.1_141	799.0	16.0	10.0	13.0	15.4	61.6	27.9	72.6
1875	C2	GS3.1_141.02	GS3.1_141	780.2	15.0	10.0	12.6	17.1	63.7	27.6	76.2
1876	C2	GS3.1_141.03	GS3.1_141	1091.8	15.0	11.0	12.3	14.9	64.2	23.7	72.0
1877	C2	GS3.1_141.04	GS3.1_141	979.0	16.5	11.0	12.6	15.9	62.0	31.2	71.7
1878	C2	GS3.1_141.05	GS3.1_141	957.5	15.5	11.0	13.2	15.4	63.4	29.8	76.8
1879	C2	GS3.1_141.06	GS3.1_141	743.2	14.0	10.5	11.4	13.6	64.4	27.4	75.6
1880	C2	GS3.1_191.01	GS3.1_191	819.4	16.5	10.0	12.2	16.0	61.7	31.5	69.2
1881	C2	GS3.1_191.02	GS3.1_191	1223.9	17.5	11.5	12.0	14.9	64.3	27.8	74.5
1882	C2	GS3.1_191.03	GS3.1_191	1317.8	17.5	11.5	12.5	14.8	64.5	28.4	74.3
1883	C2	GS3.1_191.04	GS3.1_191	977.6	18.5	11.0	12.8	16.8	62.2	28.8	72.3
1884	C2	GS3.1_191.05	GS3.1_191	1292.3	19.5	11.0	11.5	16.3	61.5	29.9	71.6
1885	C2	GS3.1_191.06	GS3.1_191	1397.2	19.5	11.5	12.6	15.7	62.3	29.4	72.6
1886	C2	GS3.1_111.02	GS3.1_111	690.0	16.0	9.5	13.1	14.4	64.1	28.8	61.7
1887	C2	GS3.1_111.03	GS3.1_111	691.2	18.0	9.5	11.6	12.9	63.1	27.8	61.2
1888	C2	GS3.1_111.04	GS3.1_111	700.5	17.0	9.5	12.9	16.1	65.0	29.4	62.0
1889	C2	GS3.1_138.01	GS3.1_138	701.8	13.0	10.0	13.6	15.6	61.0	26.4	70.1
1890	C2	GS3.1_138.02	GS3.1_138	783.6	14.0	10.0	13.4	16.2	60.6	25.4	68.0
1891	C2	GS3.1_138.03	GS3.1_138	663.2	13.0	9.5	11.9	14.7	62.1	28.9	69.9
1892	C2	GS3.1_138.04	GS3.1_138	898.3	15.5	10.5	14.8	17.6	64.6	29.1	72.3
1893	C2	GS3.1_138.05	GS3.1_138	844.9	13.5	10.5	12.2	15.4	62.9	26.9	69.3
1894	C2	GS3.1_138.06	GS3.1_138	728.2	13.0	10.5	12.4	15.1	63.2	26.5	71.7
1895	C2	GS3.1_117.01	GS3.1_117	1018.3	16.5	10.5	13.0	14.9	65.3	23.9	70.5
1896	C2	GS3.1_117.02	GS3.1_117	751.6	14.5	10.0	12.5	14.6	65.2	25.2	67.7
1897	C2	GS3.1_117.03	GS3.1_117	1161.0	16.0	11.0	11.9	13.9	66.2	23.6	70.5
1898	C2	GS3.1_117.04	GS3.1_117	752.6	15.0	9.5	11.7	13.0	64.5	25.8	65.8
1899	C2	GS3.1_117.05	GS3.1_117	949.1	15.5	9.5	11.6	14.5	66.1	24.2	70.3
1900	C2	GS3.1_117.06	GS3.1_117	823.5	16.0	9.5	12.1	15.1	63.4	24.0	68.5
1901	C2	GS3.1_105.01	GS3.1_105	744.4	15.0	9.5	11.0	11.8	67.7	24.3	61.7
1902	C2	GS3.1_105.02	GS3.1_105	1045.5	18.0	10.5	9.5	10.4	69.0	22.7	61.0
1903	C2	GS3.1_105.03	GS3.1_105	602.3	15.0	9.0	10.1	11.3	67.7	24.9	63.6
1904	C2	GS3.1_105.04	GS3.1_105	798.6	16.5	9.5	10.3	11.3	68.5	24.8	65.0
1905	C2	GS3.1_105.05	GS3.1_105	858.5	16.5	10.0	10.5	12.3	68.7	24.3	61.2
1906	C2	GS3.1_105.06	GS3.1_105	616.9	15.0	10.0	11.7	12.9	67.6	24.0	62.6
1907	C2	GS3.1_20.01	GS3.1_20	795.3	15.5	10.0	12.3	16.1	65.0	27.4	72.2
1908	C2	GS3.1_20.02	GS3.1_20	732.7	14.5	9.5	14.4	16.4	64.2	29.6	69.6
1909	C2	GS3.1_20.03	GS3.1_20	849.0	15.5	10.0	13.3	14.5	64.3	27.7	67.9
1910	C2	GS3.1_20.04	GS3.1_20	810.8	16.0	10.0	13.8	16.1	63.5	29.4	66.6
1911	C2	GS3.1_20.05	GS3.1_20	804.5	15.0	9.5	13.6	16.1	65.0	26.3	71.7
1912	C2	GS3.1_20.06	GS3.1_20	724.4	14.0	9.5	14.9	17.2	64.3	27.4	70.3
1913	C2	GS3.1_5.01	GS3.1_5	891.9	17.0	10.0	11.9	13.5	61.7	26.1	67.0
1914	C2	GS3.1_5.02	GS3.1_5	678.2	15.5	9.5	11.4	13.7	62.0	26.8	70.5
1915	C2	GS3.1_5.03	GS3.1_5	853.9	16.0	10.0	11.4	13.5	64.0	25.6	65.5
1916	C2	GS3.1_5.04	GS3.1_5	667.8	15.5	10.0	11.3	12.7	63.3	23.8	62.9
1917	C2	GS3.1_5.05	GS3.1_5	795.7	15.5	10.0	11.5	12.6	62.2	24.9	65.9
1918	C2	GS3.1_5.06	GS3.1_5	692.7	15.0	9.0	12.1	13.7	61.1	25.8	68.2
1919	C2	GS3.1_60.01	GS3.1_60	819.5	13.5	10.0	13.6	16.4	63.9	31.2	72.2
1920	C2	GS3.1_60.02	GS3.1_60	739.5	14.0	9.0	13.3	15.6	64.4	28.3	70.7
1921	C2	GS3.1_60.03	GS3.1_60	879.4	14.5	10.0	13.8	16.4	64.8	30.0	74.8
1922	C2	GS3.1_60.04	GS3.1_60	653.0	13.5	9.0	14.5	18.0	63.3	29.3	68.7
1923	C2	GS3.1_60.05	GS3.1_60	957.9	15.5	10.0	13.7	18.2	64.3	29.2	73.7
1924	C2	GS3.1_15.01	GS3.1_15	798.6	15.0	9.5	14.1	16.3	64.7	28.0	66.8
1925	C2	GS3.1_15.02	GS3.1_15	845.4	16.0	10.0	13.0	16.3	62.2	30.8	65.5
1926	C2	GS3.1_15.03	GS3.1_15	829.1	15.0	10.5	13.6	16.7	63.2	30.6	72.8
1927	C2	GS3.1_15.04	GS3.1_15	818.5	15.0	10.0	13.4	16.6	61.8	33.1	67.3
1928	C2	GS3.1_15.05	GS3.1_15	927.9	14.0	11.0	13.1	16.0	66.4	25.6	67.9
1929	C2	GS3.1_15.06	GS3.1_15	597.4	14.0	9.0	12.8	15.7	63.9	28.8	67.4
1930	C2	GS3.1_172.1	GS3.1_172	880.3	15.5	9.5	12.6	13.4	66.4	25.6	67.6
1931	C2	GS3.1_172.2	GS3.1_172	743.5	16.5	9.5	12.9	15.4	65.1	24.2	67.9
1932	C2	GS3.1_172.3	GS3.1_172	710.8	14.0	9.5	12.5	13.7	64.7	24.8	70.6
1933	C2	GS3.1_172.4	GS3.1_172	886.8	16.5	9.0	13.4	15.2	66.2	22.7	66.4
1934	C2	GS3.1_172.5	GS3.1_172	883.9	15.5	10.0	11.5	11.5	67.4	22.3	67.5
1935	C2	GS3.1_172.6	GS3.1_172	771.7	15.0	10.5	12.2	15.2	65.6	23.4	70.6
1936	C2	GS3.1_106.01	GS3.1_106	735.2	16.5	10.5	8.8	9.0	71.0	20.7	58.9
1937	C2	GS3.1_106.02	GS3.1_106	551.5	14.5	9.0	9.0	9.6	70.0	22.9	62.0
1938	C2	GS3.1_93.1	GS3.1_93	806.9	14.5	10.0	12.3	15.0	66.5	27.7	71.6
1939	C2	GS3.1_93.2	GS3.1_93	918.8	15.0	11.0	14.1	15.7	63.8	28.7	68.2
1940	C2	GS3.1_93.3	GS3.1_93	600.3	13.5	9.0	13.7	16.4	63.2	29.0	71.8
1941	C2	GS3.1_93.4	GS3.1_93	605.9	15.5	9.5	16.5	20.0	60.1	32.1	67.7
1942	C2	GS3.1_93.5	GS3.1_93	782.9	14.5	10.0	13.1	15.9	65.0	27.3	73.5
1943	C2	GS3.1_93.6	GS3.1_93	784.7	13.5	10.0	14.3	17.0	63.2	29.0	69.6
1944	C2	GS3.1_187.1	GS3.1_187	1102.1	17.5	13.0	12.4	14.0	65.5	24.9	65.1
1945	C2	GS3.1_187.2	GS3.1_187	725.6	15.5	9.5	13.1	15.5	63.6	27.0	65.9
1946	C2	GS3.1_187.3	GS3.1_187	1347.6	17.5	12.0	12.4	14.0	65.6	24.8	70.2
1947	C2	GS3.1_187.4	GS3.1_187	790.7	15.5	10.5	15.0	17.3	65.0	26.6	67.1
1948	C2	GS3.1_187.5	GS3.1_187	997.2	16.5	10.5	10.5	15.1	65.6	25.4	66.9
1949	C2	GS3.1_187.6	GS3.1_187	746.2	16.0	9.5	12.8	14.9	65.7	24.3	66.1
1950	C2	GS3.1_64.1	GS3.1_64	631.2	14.5	10.5	11.4	14.3	64.6	24.2	67.4
1951	C2	GS3.1_64.2	GS3.1_64	1185.9	17.5	17.5	10.1	11.7	67.3	23.9	65.6
1952	C2	GS3.1_64.3	GS3.1_64	918.2	18.0	10.5	11.3	12.5	64.9	24.9	67.5
1953	C2	GS3.1_64.4	GS3.1_64	898.2	16.0	10.5	12.4	14.0	65.1	24.4	68.6
1954	C2	GS3.1_64.5	GS3.1_64	849.7	16.0	10.5	12.8	15.2	63.4	26.1	70.7
1955	C2	GS3.1_64.6	GS3.1_64	1023.4	17.5	11.5	10.4	12.0	65.3	24.9	67.5
1956	C2	GS3.1_118.1	GS3.1_118	839.7	14.0	10.0	13.7	15.2	67.2	27.1	72.7
1957	C2	GS3.1_118.2	GS3.1_118	804.7	14.0	10.0	14.6	16.6	65.3	27.2	70.3
1958	C2	GS3.1_118.3	GS3.1_118	971.0	14.0	11.0	13.4	15.0	65.8	25.9	69.2
1959	C2	GS3.1_118.4	GS3.1_118	780.5	14.0	9.5	13.2	14.7	65.6	26.0	70.5
1960	C2	GS3.1_118.5	GS3.1_118	1208.1	15.0	10.5	13.0	14.5	65.4	26.6	68.5
1961	C2	GS3.1_118.6	GS3.1_118	834.4	14.0	11.0	14.3	16.6	64.7	26.2	68.0
1962	C2	GS3.1_124.1	GS3.1_124	821.9	19.0	10.5	11.2	13.0	62.0	23.1	63.5
1963	C2	GS3.1_124.2	GS3.1_124	639.0	19.0	9.5	10.3	12.6	65.4	23.0	65.6
1964	C2	GS3.1_124.3	GS3.1_124	777.2	18.5	10.0	10.3	10.2	65.0	25.3	65.8
1965	C2	GS3.1_124.4	GS3.1_124	595.3	18.0	9.5	11.1	13.1	65.0	25.0	68.8
1966	C2	GS3.1_124.5	GS3.1_124	782.7	17.5	10.5	11.5	13.2	65.8	26.8	68.9
1967	C2	GS3.1_131.1	GS3.1_131	802.5	18.0	10.0	7.6	8.1	69.2	22.1	57.9
1968	C2	GS3.1_131.2	GS3.1_131	754.7	17.0	9.5	8.5	9.4	69.3	21.3	55.9
1969	C2	GS3.1_131.3	GS3.1_131	504.4	15.5	8.5	9.0	9.8	69.8	21.8	60.1
1970	C2	GS3.1_131.4	GS3.1_131	746.2	15.5	9.5	9.3	9.4	68.7	24.1	58.9
1971	C2	GS3.1_131.5	GS3.1_131	849.5	17.5	10.5	7.9	8.0	69.5	21.4	58.6
1972	C2	GS3.1_131.6	GS3.1_131	627.1	15.0	9.5	9.7	9.8	70.6	22.3	56.7
1973	C2	GS3.1_114.1	GS3.1_114	928.3	7.0	10.0	13.0	14.6	61.7	29.5	65.7
1974	C2	GS3.1_114.2	GS3.1_114	1036.4	17.0	11.0	11.5	12.9	64.8	28.2	69.2
1975	C2	GS3.1_114.3	GS3.1_114	852.1	16.5	10.0	12.2	13.4	63.7	28.9	62.5
1976	C2	GS3.1_114.4	GS3.1_114	1023.8	17.5	11.0	13.5	16.0	63.0	29.3	68.1
1977	C2	GS3.1_114.5	GS3.1_114	1051.0	7.5	10.5	12.6	15.2	63.0	28.7	67.7
1978	C2	GS3.1_114.6	GS3.1_114	943.7	16.5	11.0	12.9	15.0	64.0	27.3	67.8
1979	C2	GS3.1_168.1	GS3.1_168	1251.5	16.5	11.0	12.0	14.3	67.6	21.1	67.9
1980	C2	GS3.1_168.2	GS3.1_168	567.6	14.0	9.5	13.5	15.3	65.4	23.8	63.8
1981	C2	GS3.1_168.3	GS3.1_168	568.9	13.5	9.0	13.2	15.7	64.7	22.4	64.7
1982	C2	GS3.1_168.4	GS3.1_168	605.6	13.5	9.5	13.1	17.6	65.7	22.7	64.1
1983	C2	GS3.1_168.5	GS3.1_168	1156.3	16.0	11.0	12.0	14.7	64.6	22.5	64.6
1984	C2	GS3.1_168.6	GS3.1_168	1262.6	5.5	12.0	12.1	13.6	65.3	23.0	61.9
1985	C2	GS3.1_107.1	GS3.1_107	839.8	19.0	10.0	12.6	14.2	62.6	23.2	57.9
1986	C2	GS3.1_107.2	GS3.1_107	685.1	19.0	9.5	12.0	14.7	63.5	27.7	74.2
1987	C2	GS3.1_107.3	GS3.1_107	750.9	18.0	10.5	11.9	14.6	63.6	27.6	73.2
1988	C2	GS3.1_107.4	GS3.1_107	906.9	20.0	10.0	11.5	14.0	65.1	27.3	71.0
1989	C2	GS3.1_135.2	GS3.1_135	768.1	18.5	9.5	9.9	10.0	70.1	22.7	60.5
1990	C2	GS3.1_135.3	GS3.1_135	574.8	16.0	9.5	9.4	10.1	69.2	23.5	63.3
1991	C2	GS3.1_135.4	GS3.1_135	545.0	16.5	9.0	10.9	11.9	68.0	22.0	62.2
1992	C2	GS3.1_135.5	GS3.1_135	673.2	17.0	10.0	9.4	10.0	69.2	22.7	58.9
1993	C2	GS3.1_135.6	GS3.1_135	553.3	16.0	9.5	10.4	13.2	67.6	23.7	61.1
1994	C2	GS3.1_66.1	GS3.1_66	831.8	16.5	10.5	9.3	9.5	69.9	22.3	58.5
1995	C2	GS3.1_66.2	GS3.1_66	521.8	15.5	9.0	10.3	11.5	68.2	23.6	64.2
1996	C2	GS3.1_66.3	GS3.1_66	828.3	17.0	10.0	11.3	10.9	68.8	21.3	57.4
1997	C2	GS3.1_66.4	GS3.1_66	827.7	17.0	10.0	9.8	10.3	70.6	21.3	58.9
1998	C2	GS3.1_169.1	GS3.1_169	499.6	12.5	8.5	9.6	15.8	67.3	27.6	73.1
1999	C2	GS3.1_169.2	GS3.1_169	719.2	15.0	9.5	12.3	16.7	69.0	23.9	76.5
[truncated: 1,884 more rows]
